# Supplementary material for: Codon Usage Analyses Reveal the Evolutionary Patterns among Plastid Genes of Saxifragales at a Larger-Sampling Scale
Source: MDPI journal article supplement (doi:10.3390/genes14030694), 2023-03-11

**Figure S1:** The PR2 plots of the 50 plastid genes among Saxifragales

***accD***

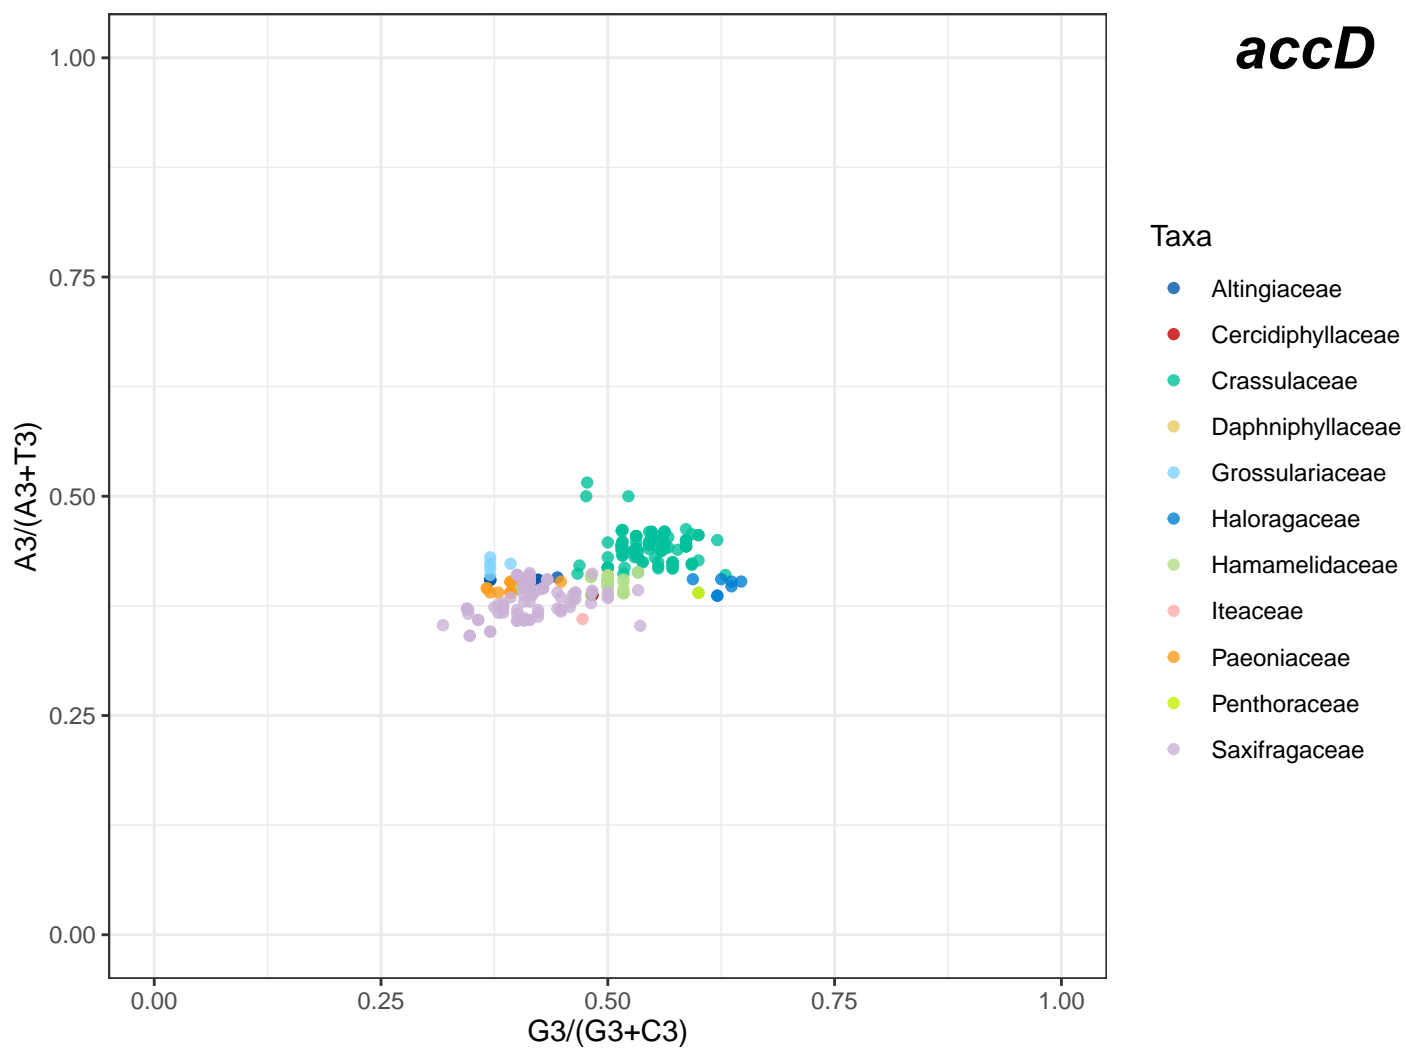

# *atpA*

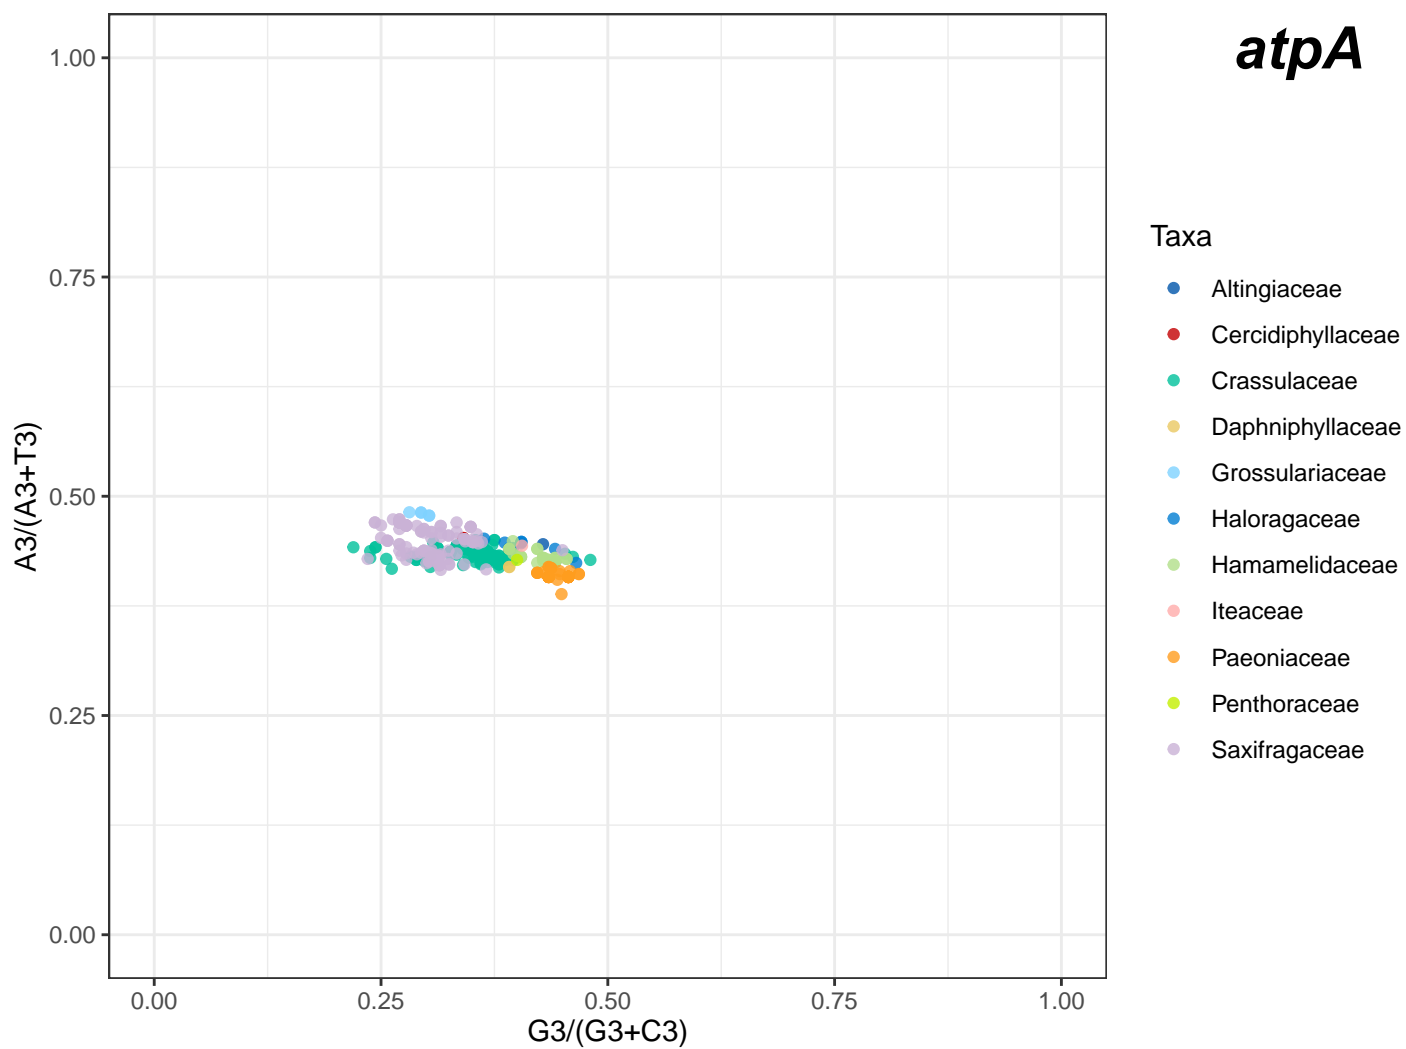

# *atpB*

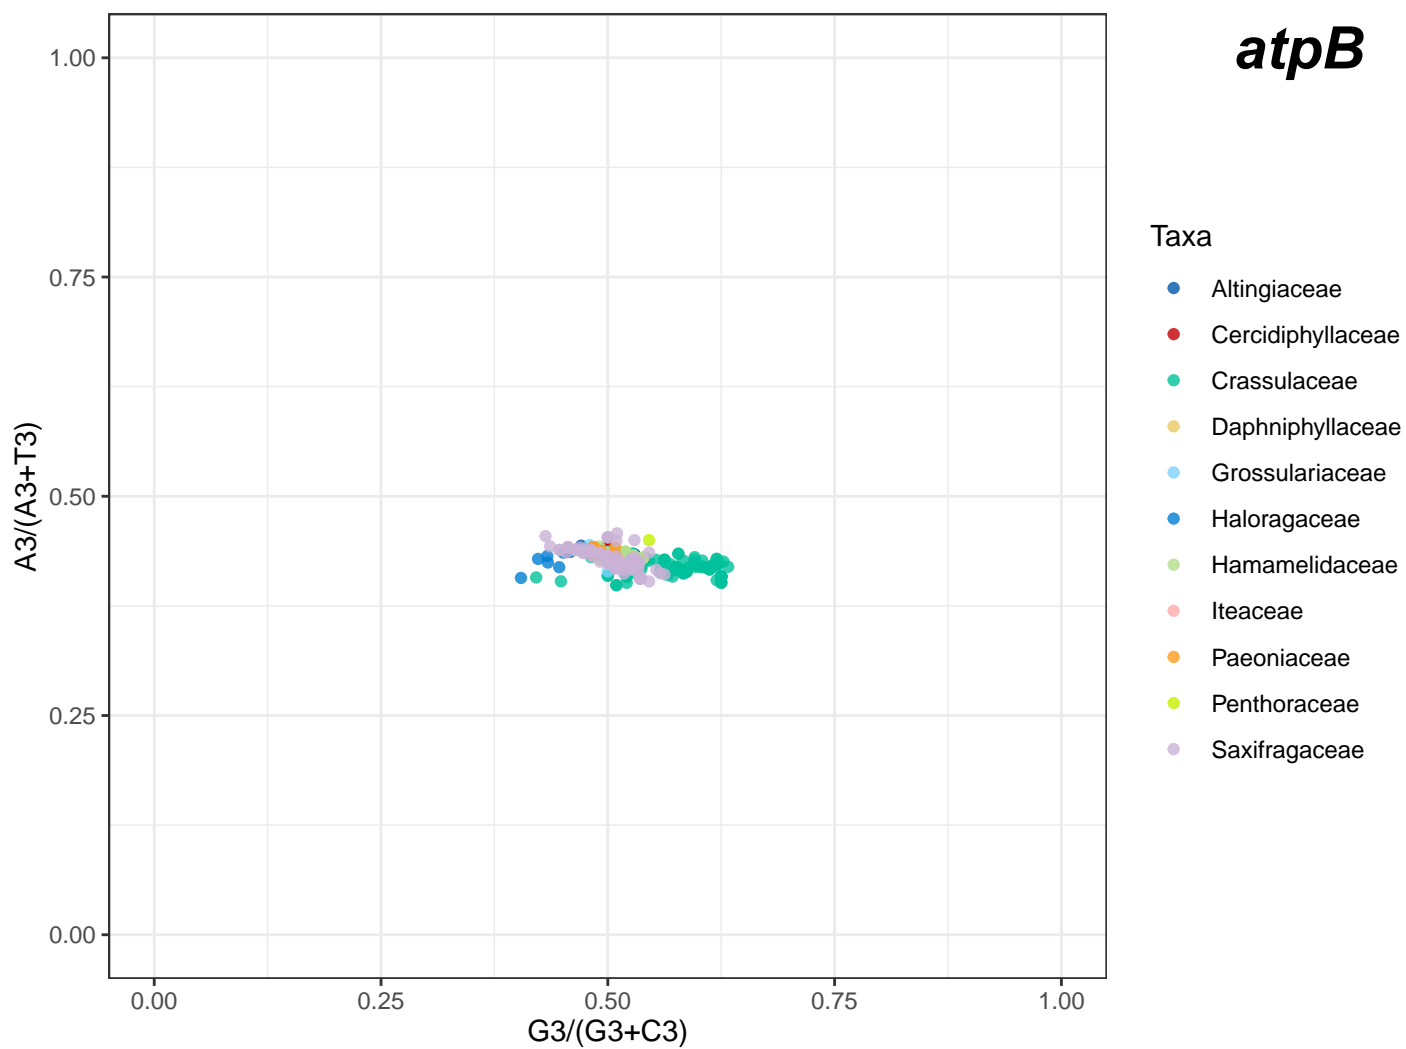

# *atpE*

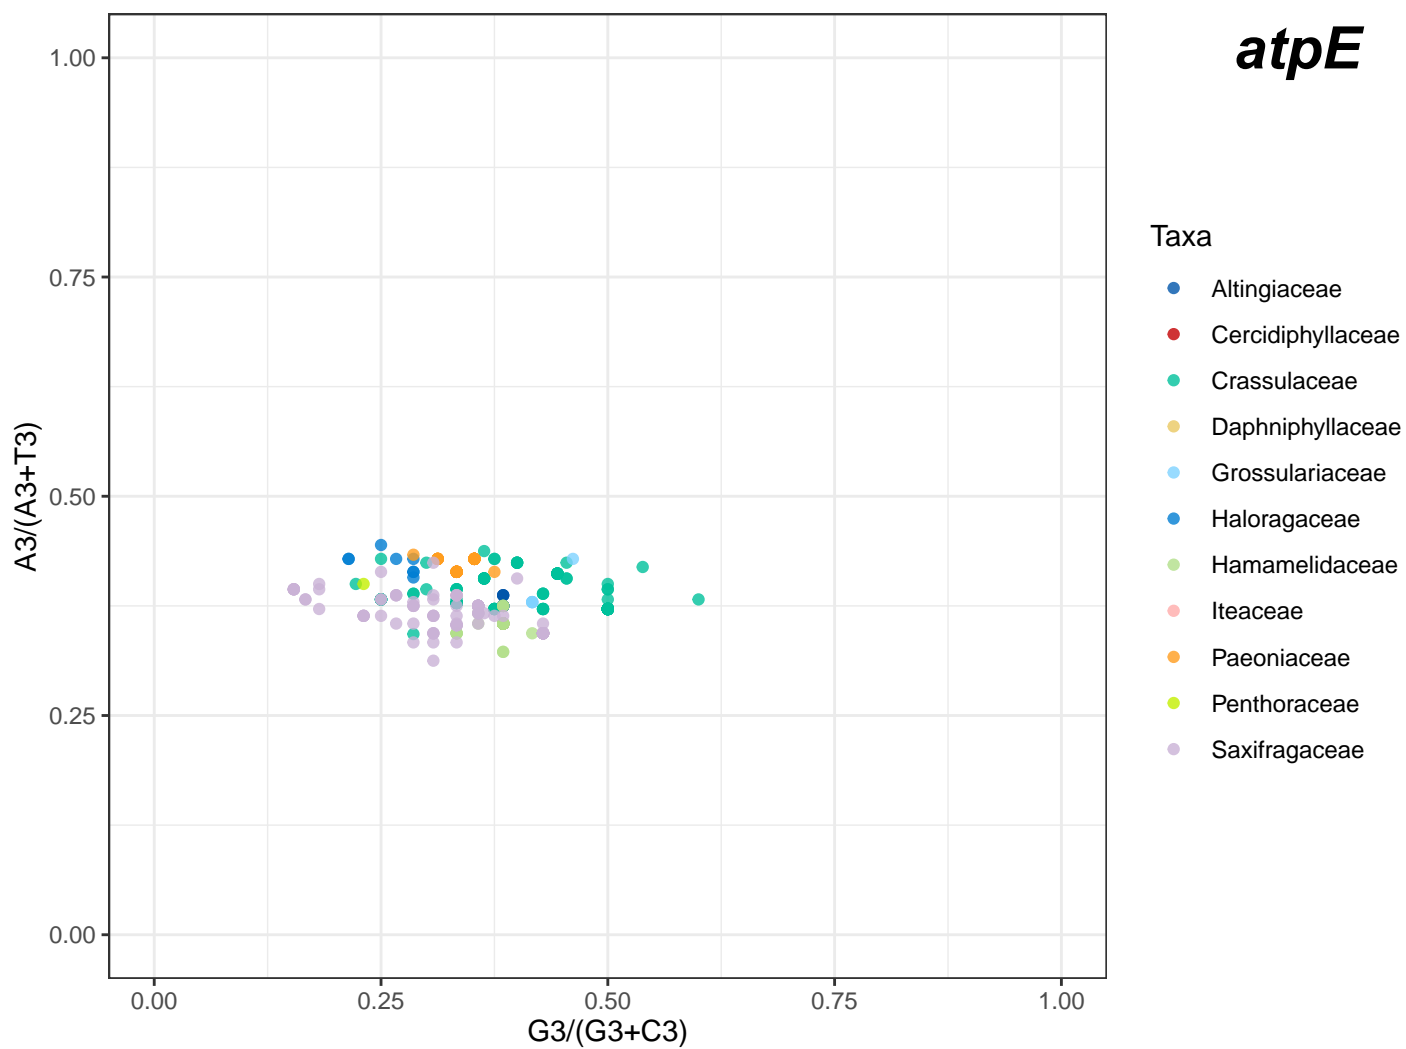

# *atpF*

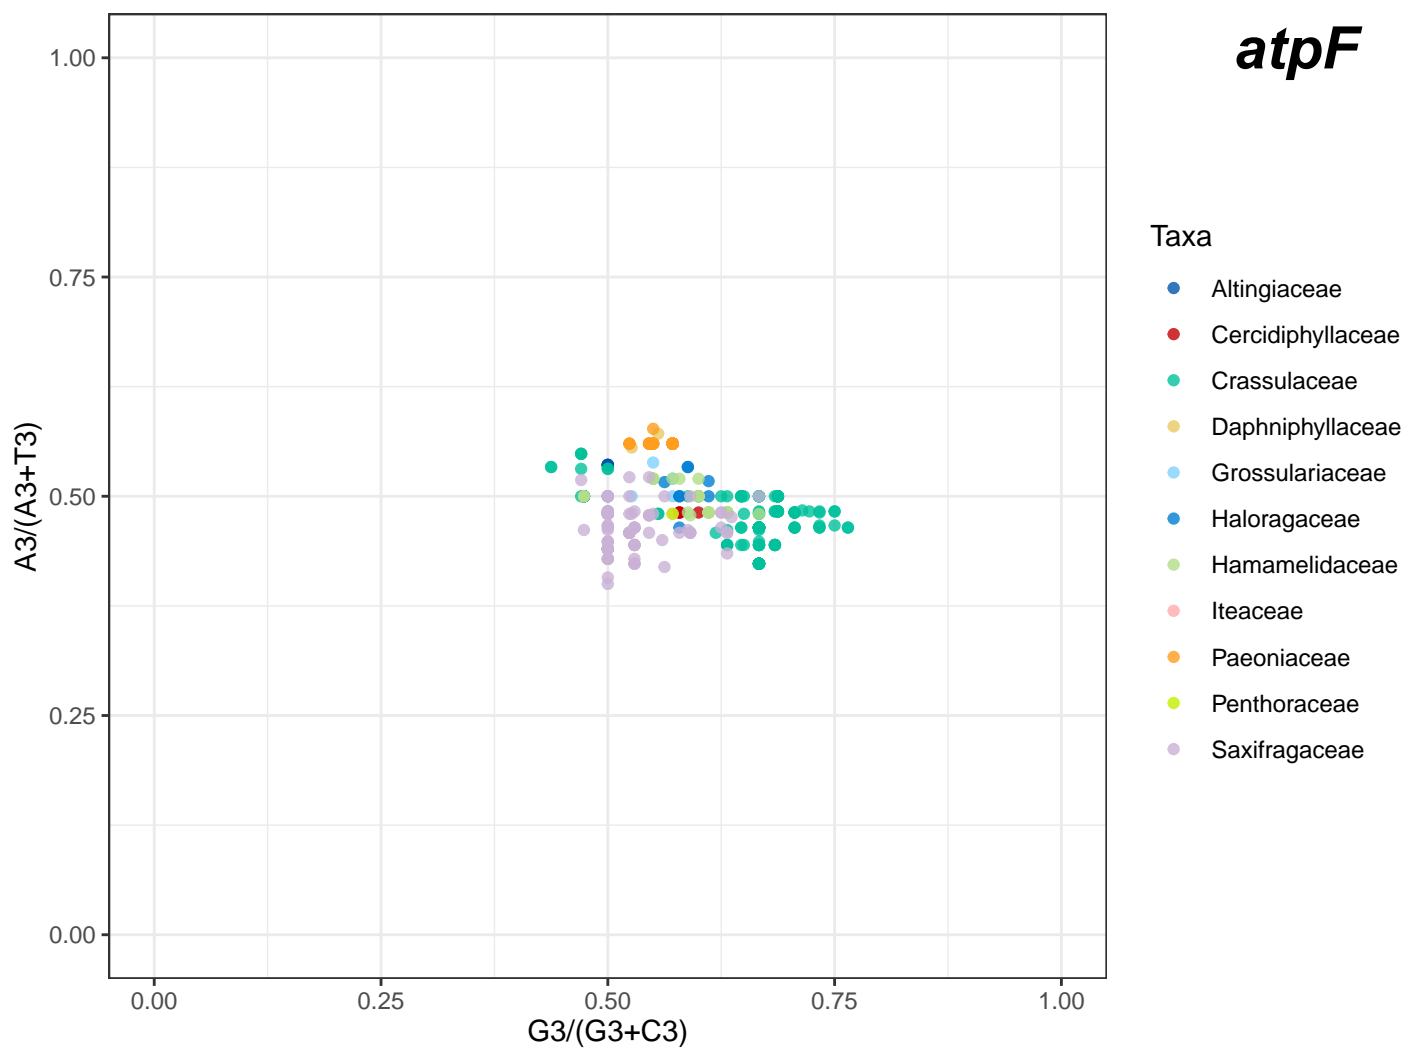

***atpl***

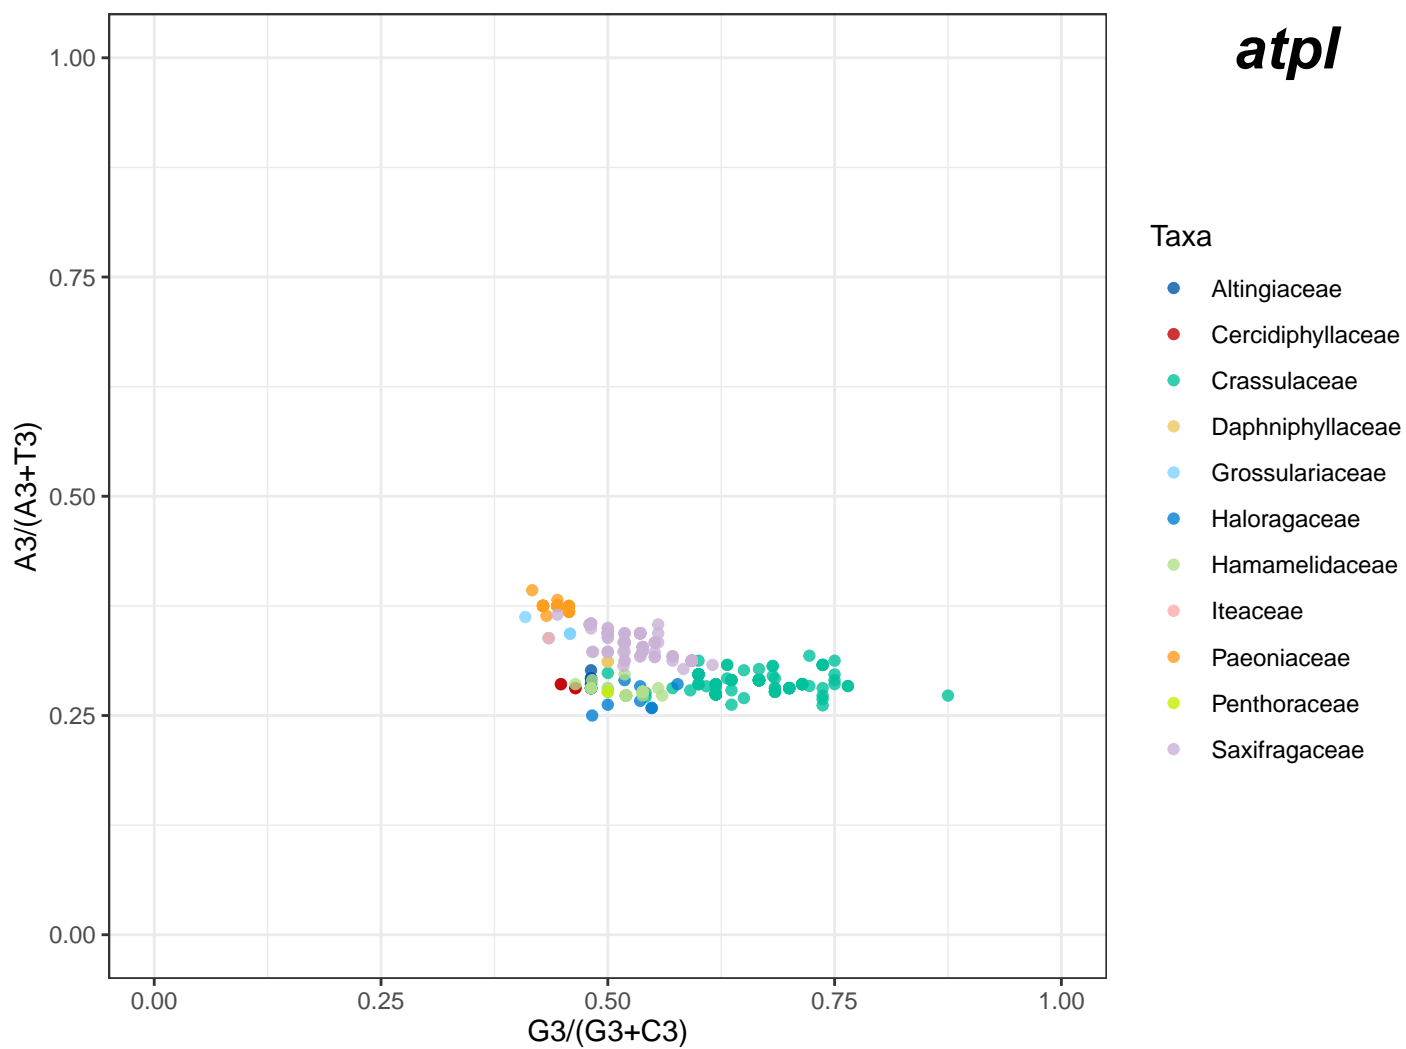

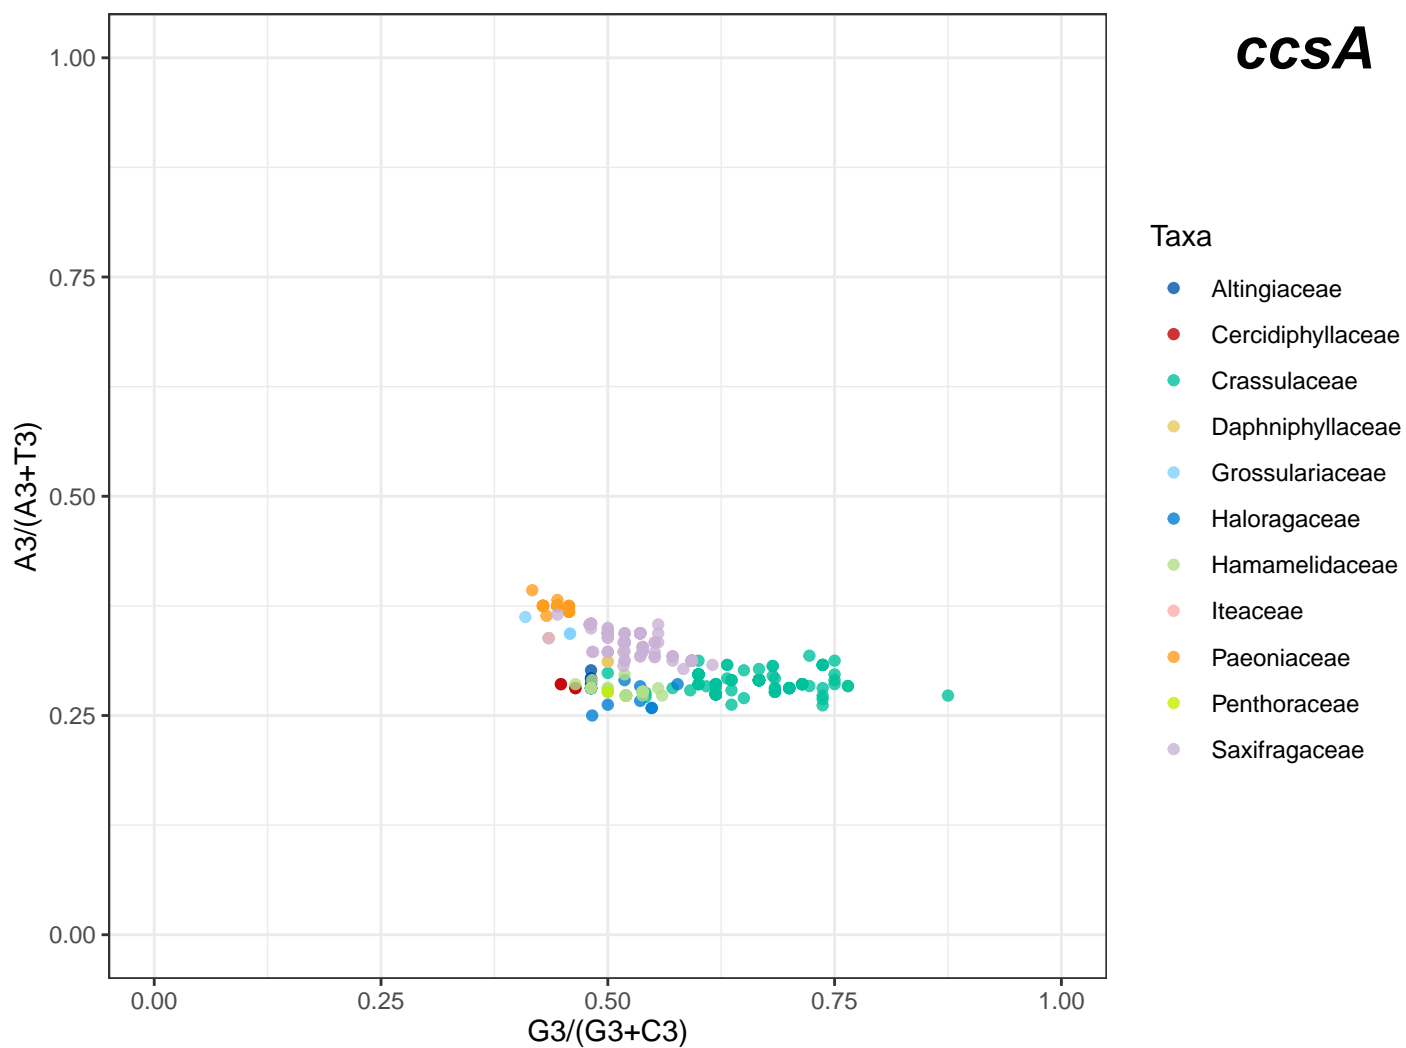



# *cemA*

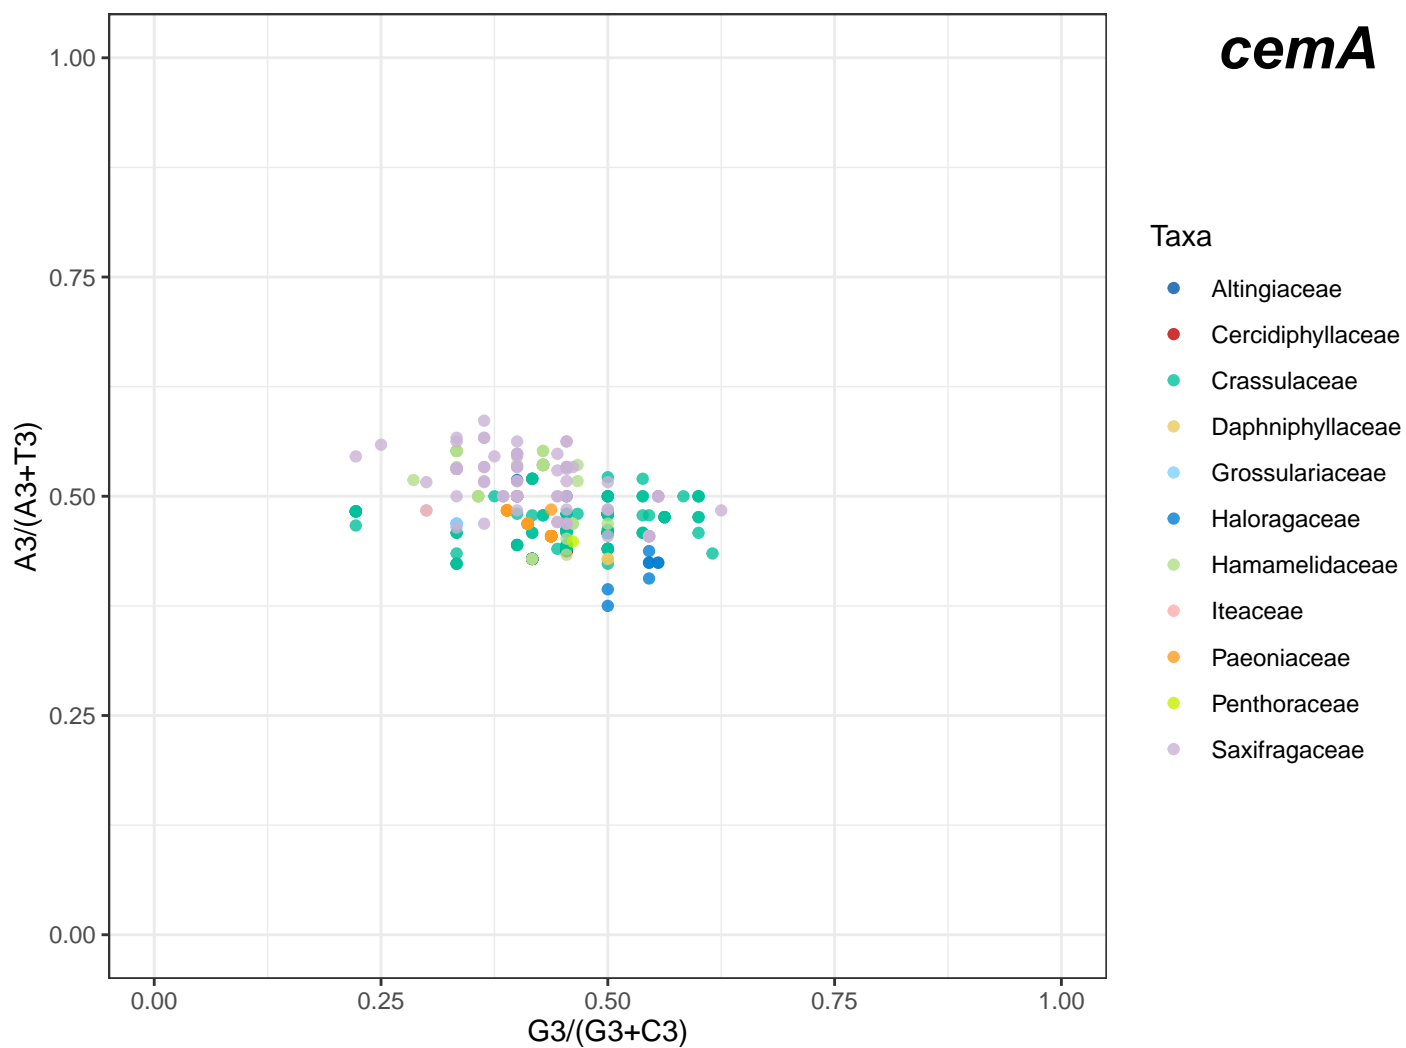

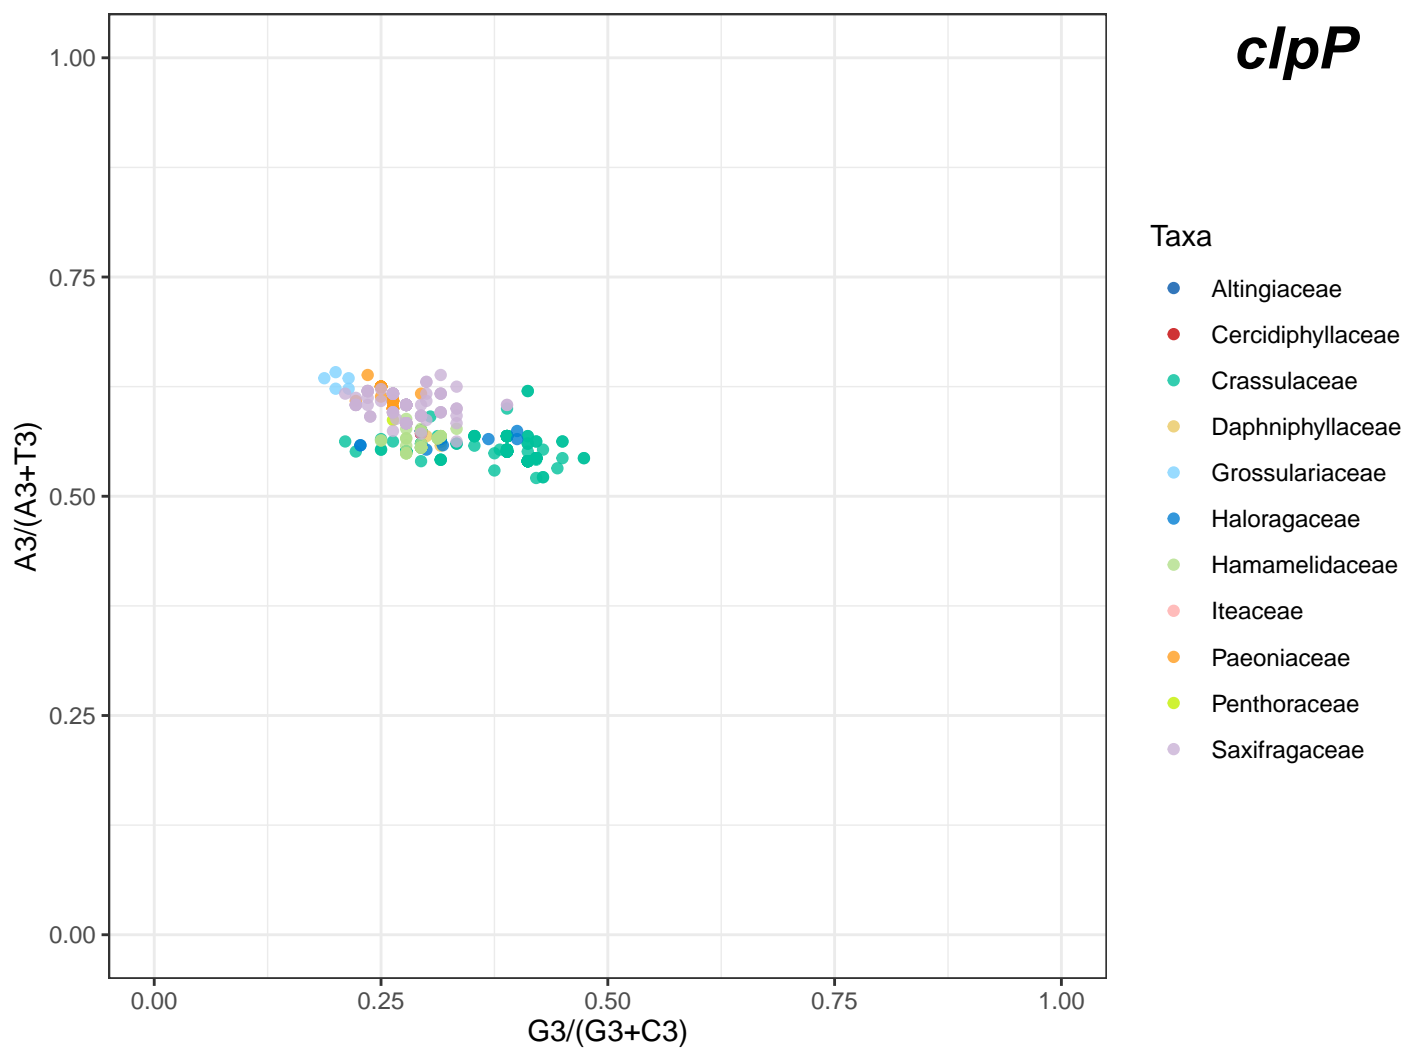

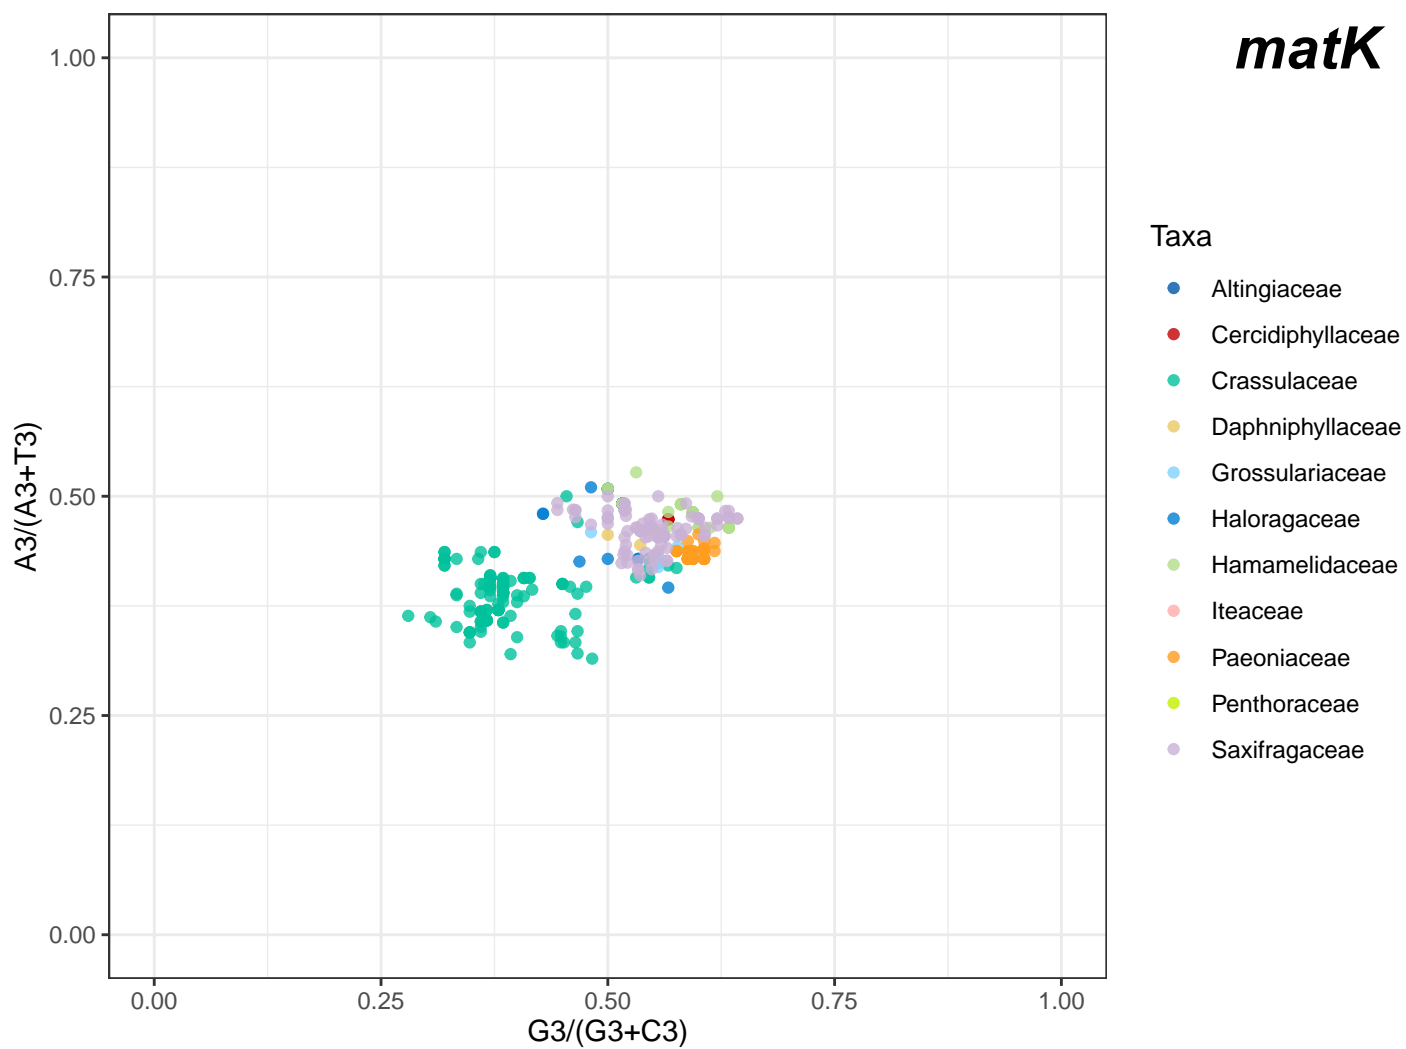

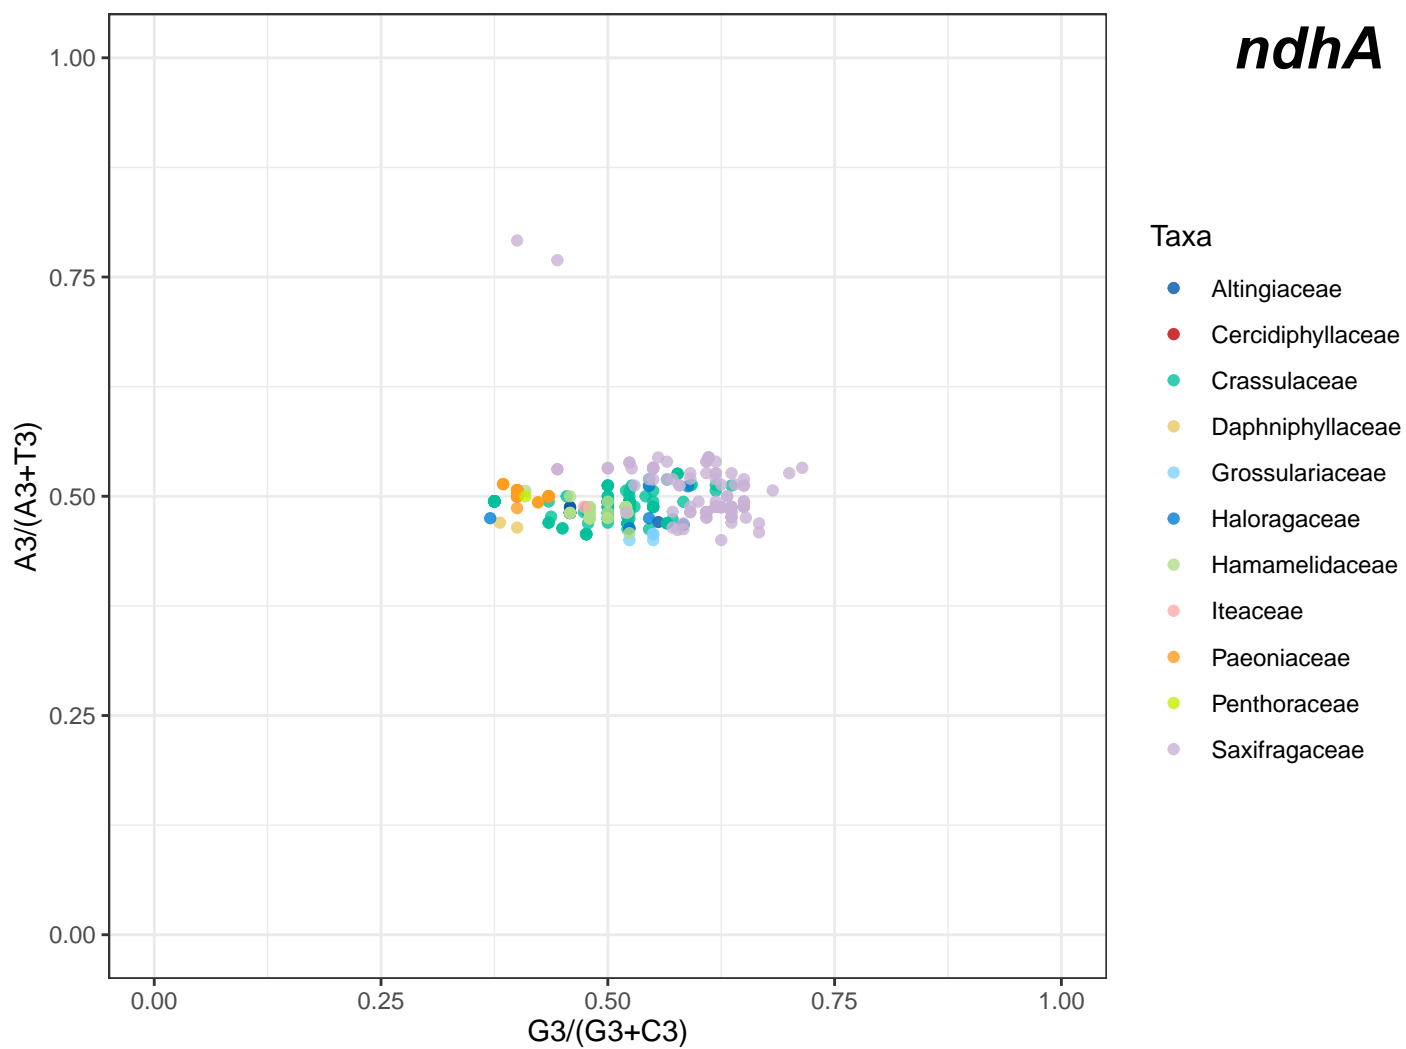

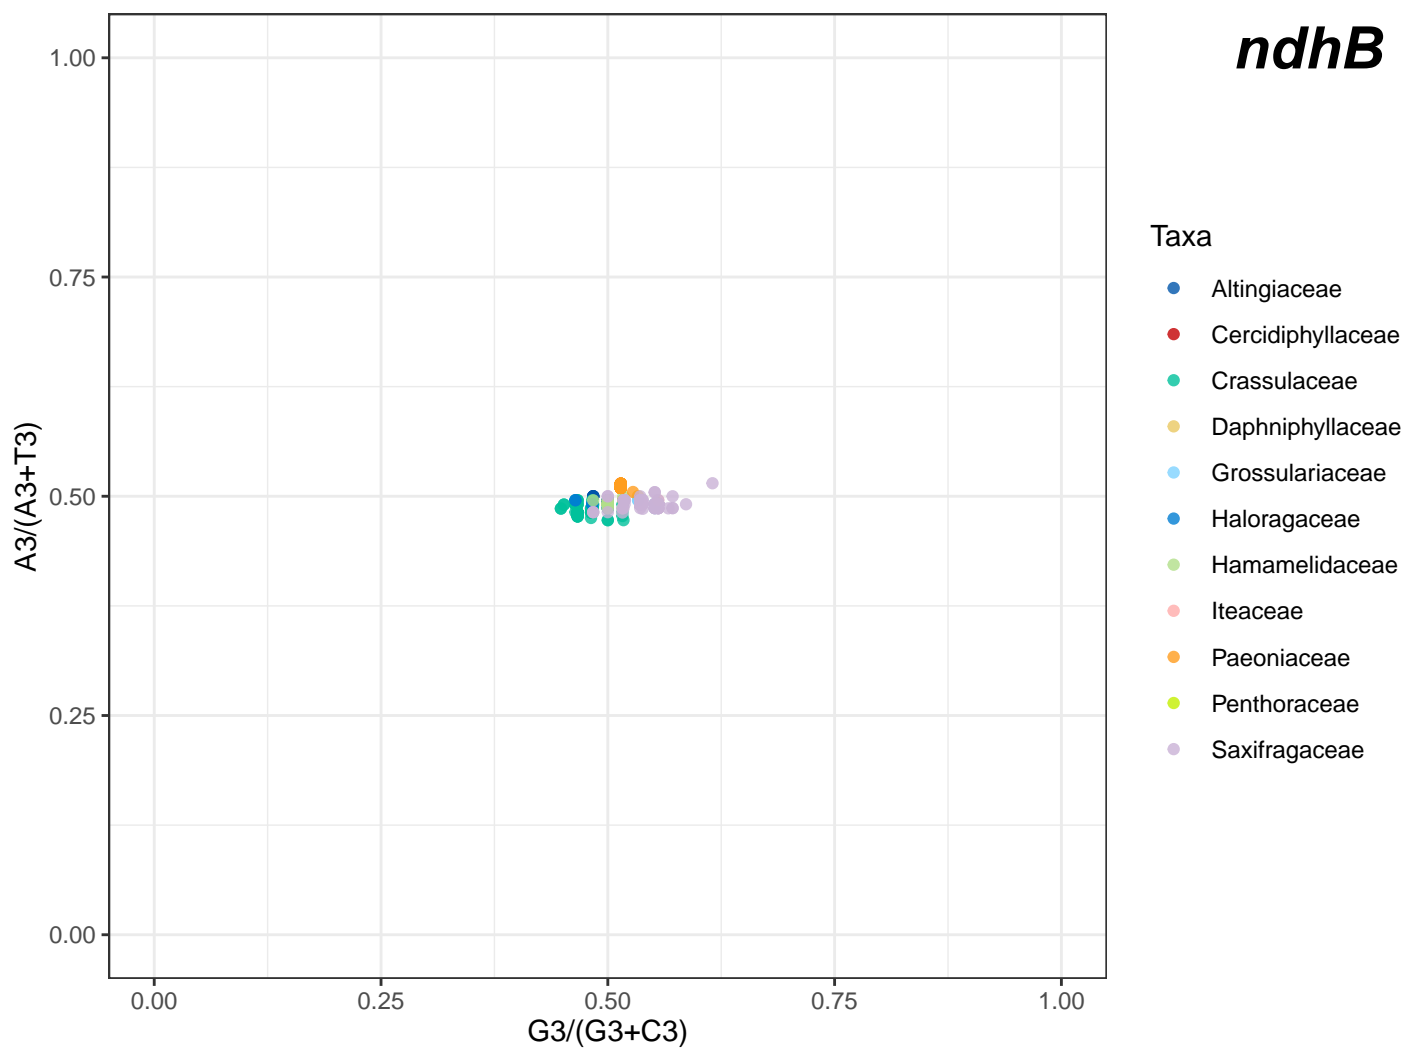



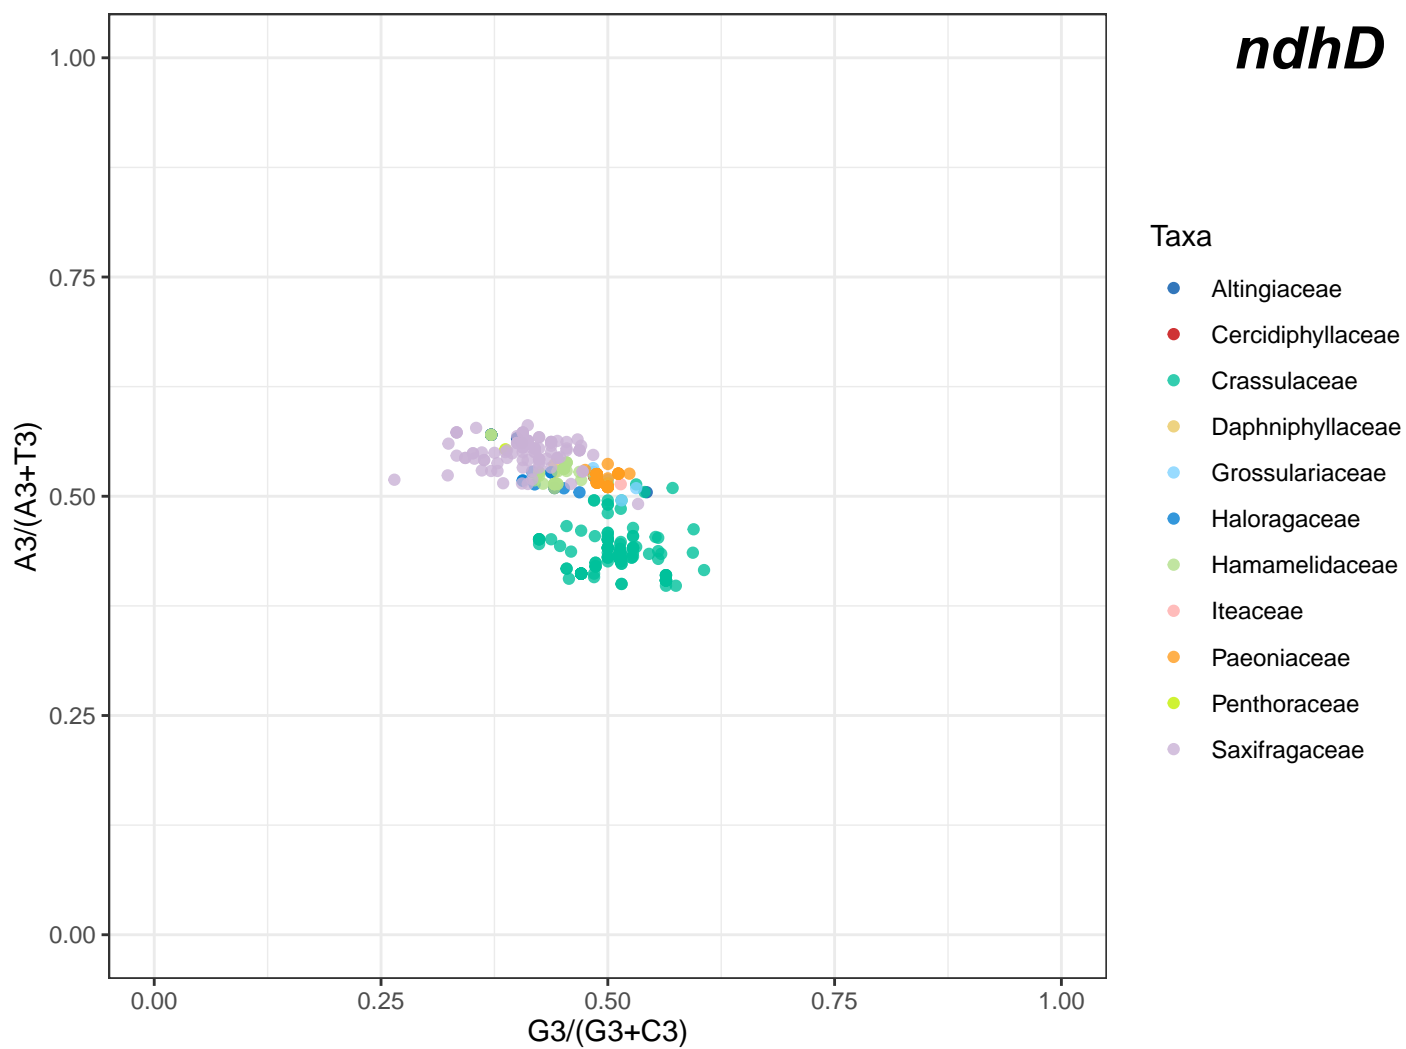

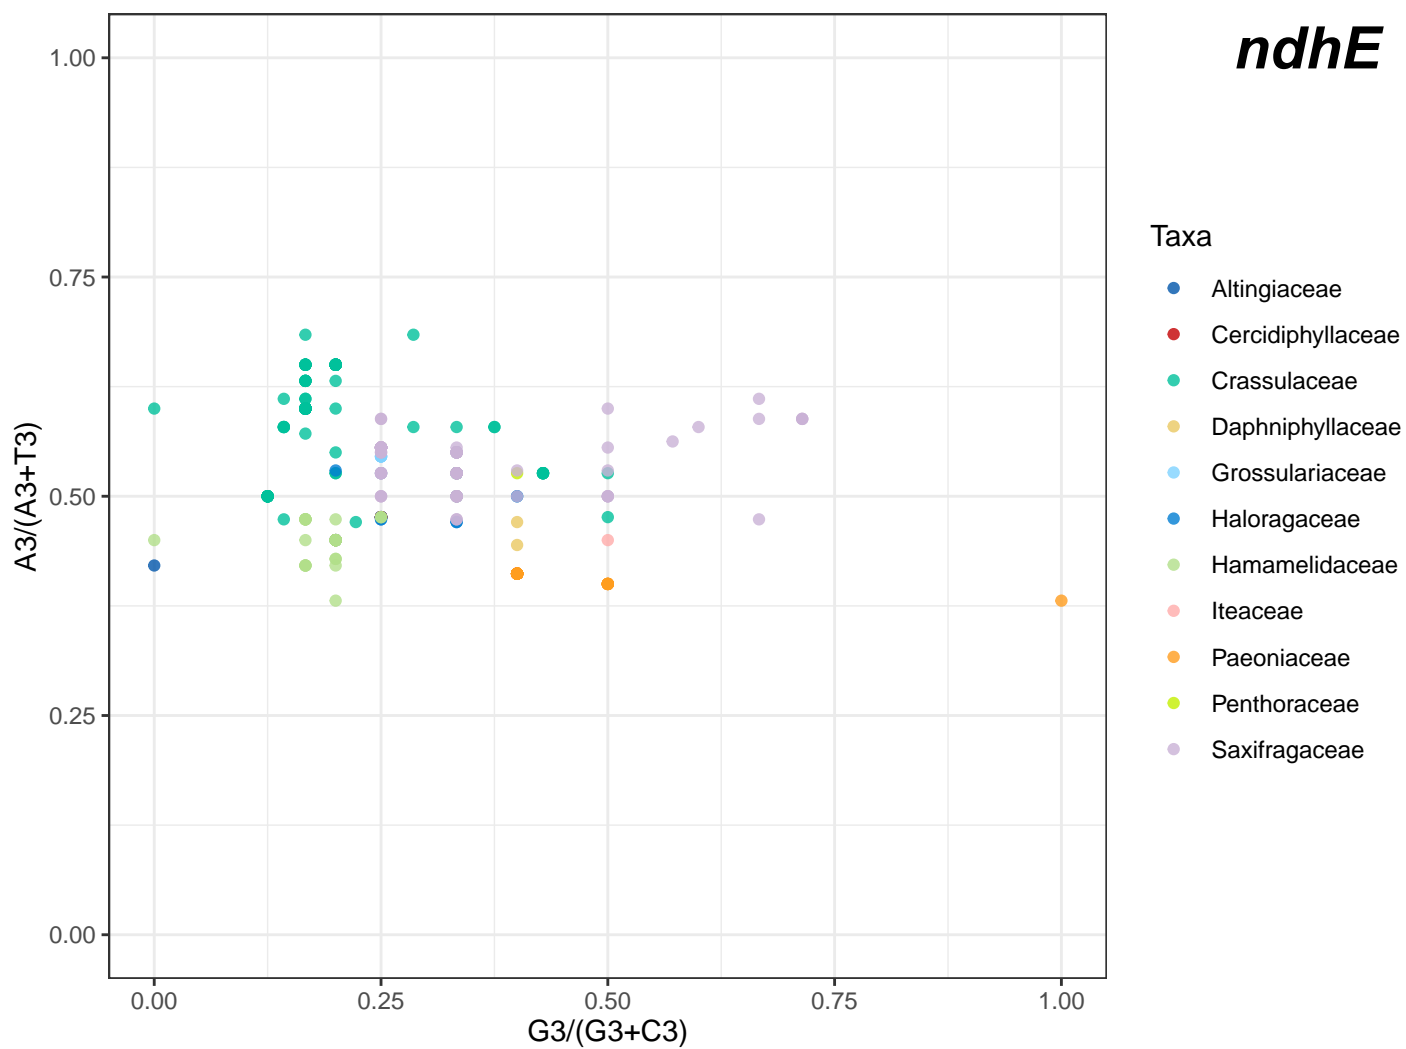



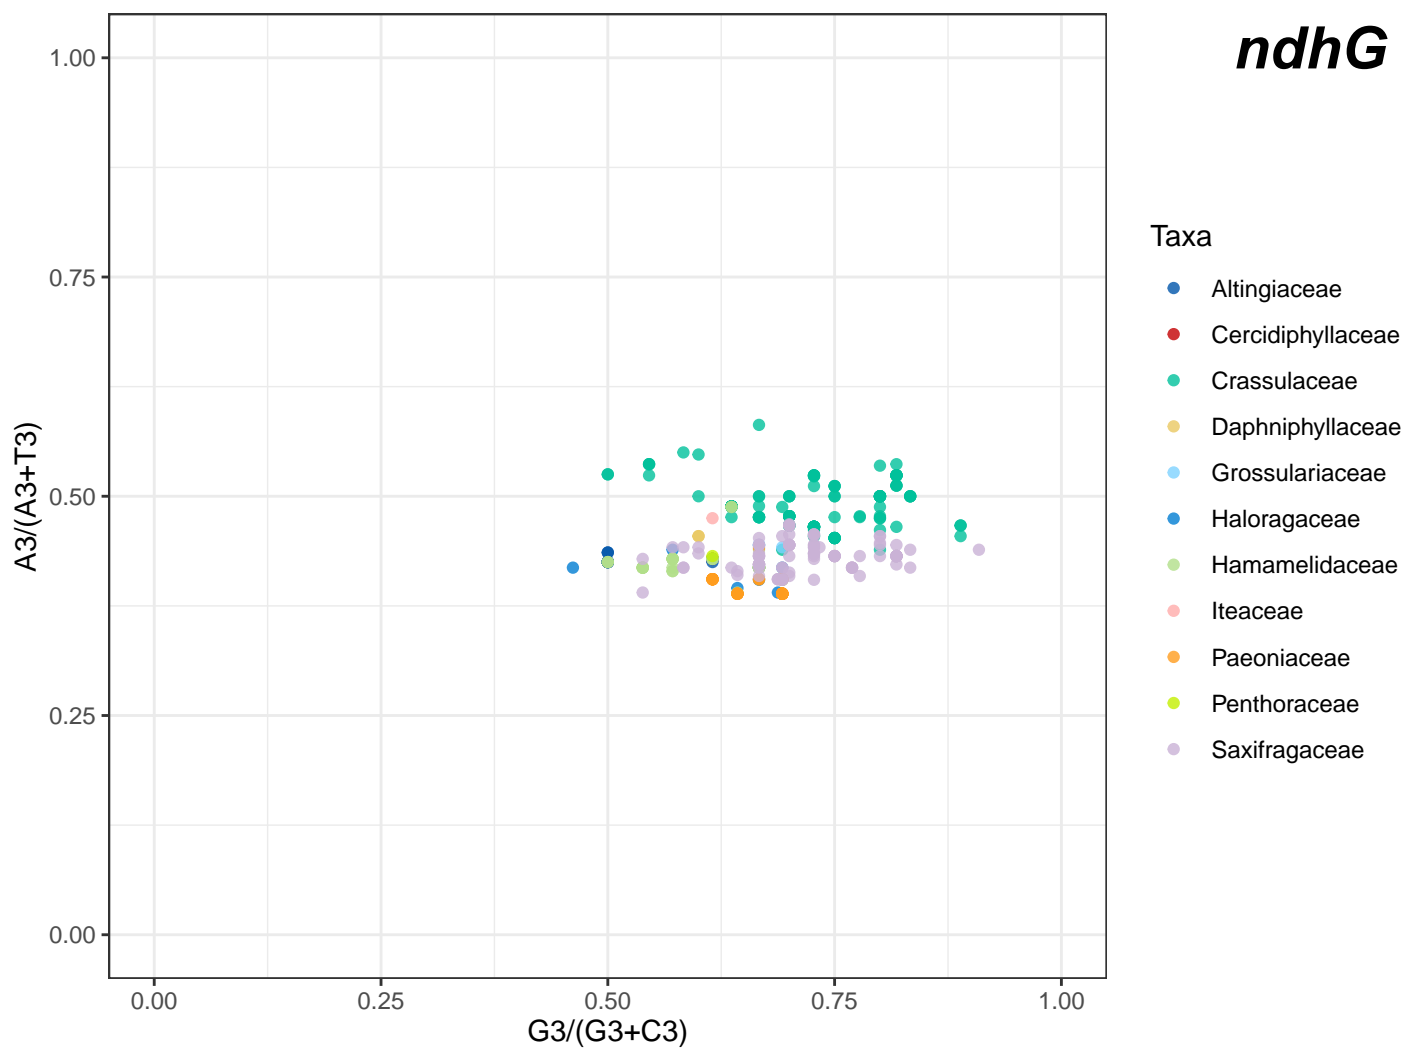

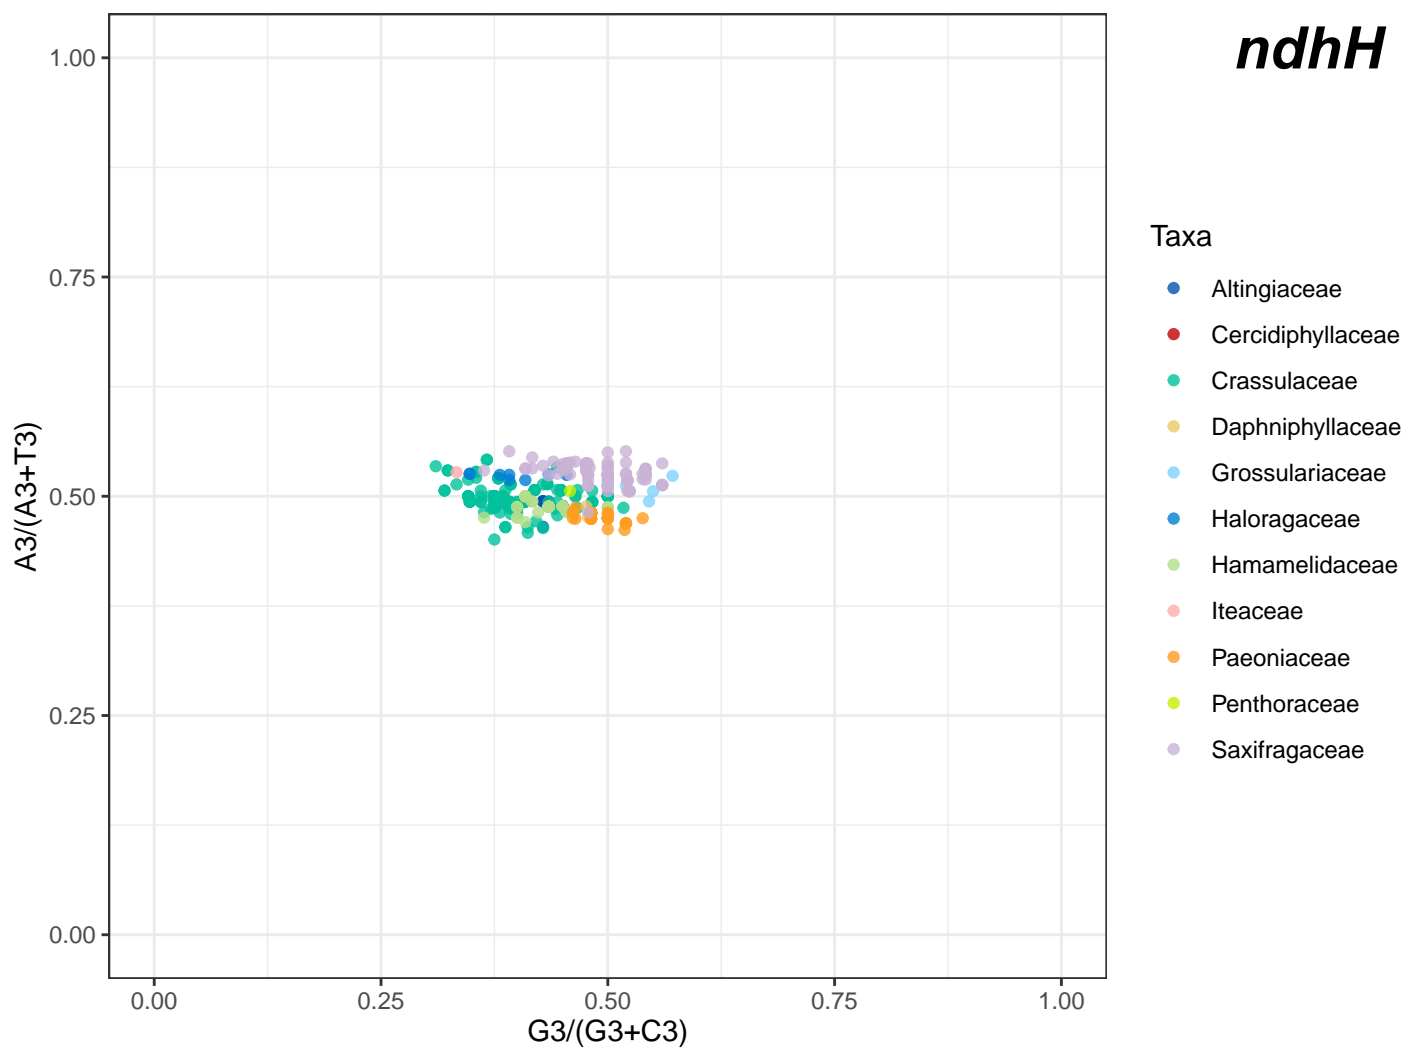

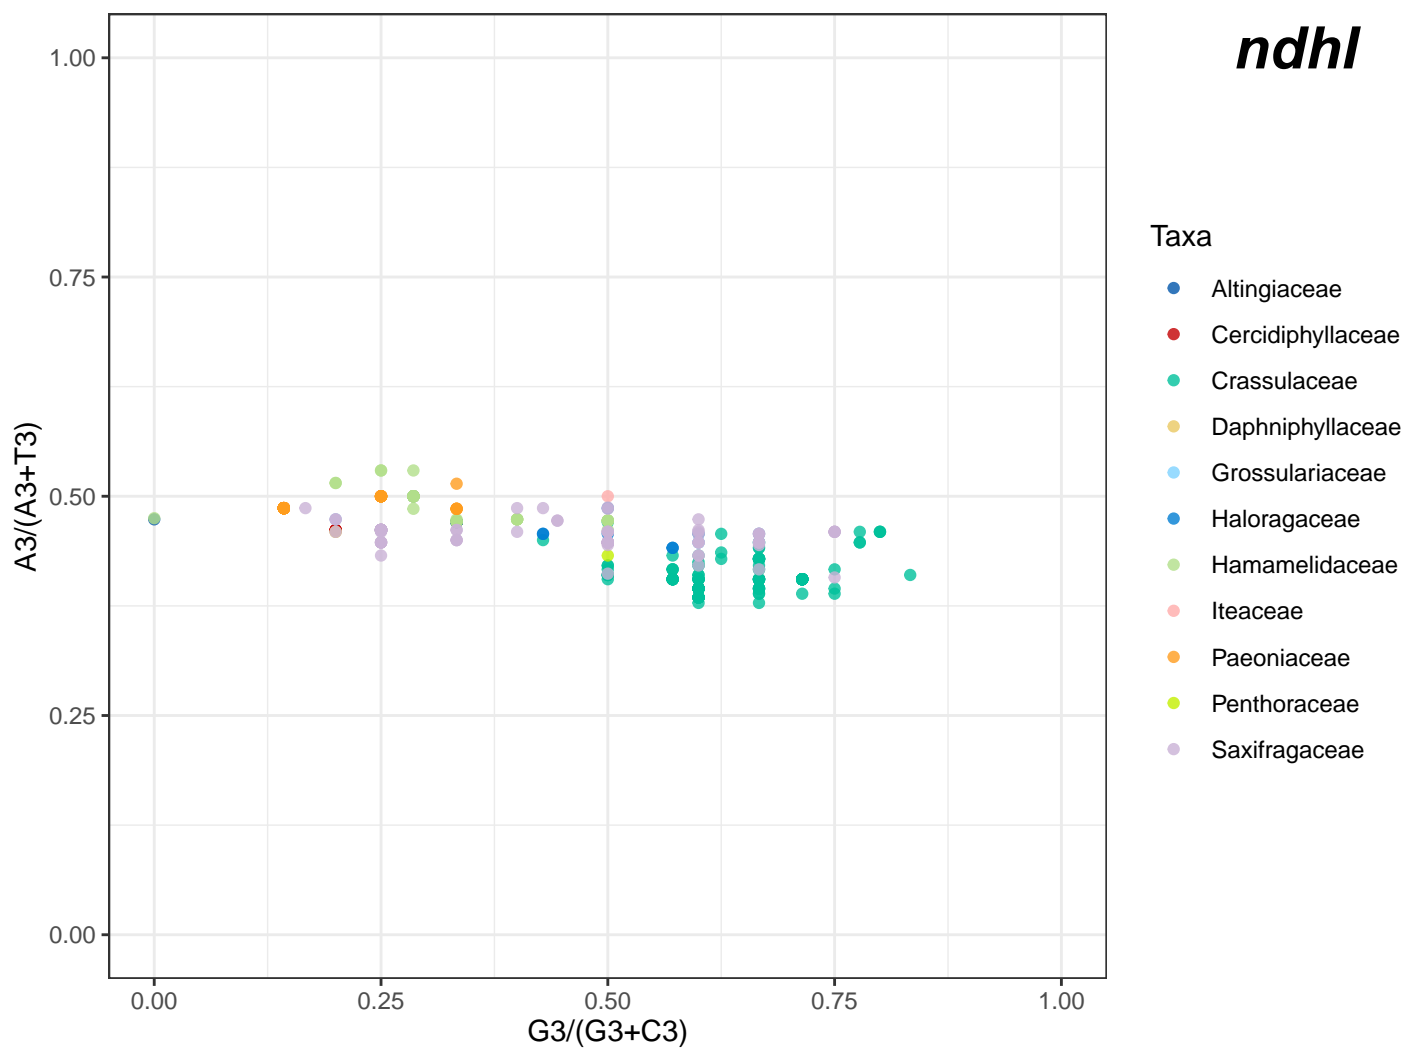

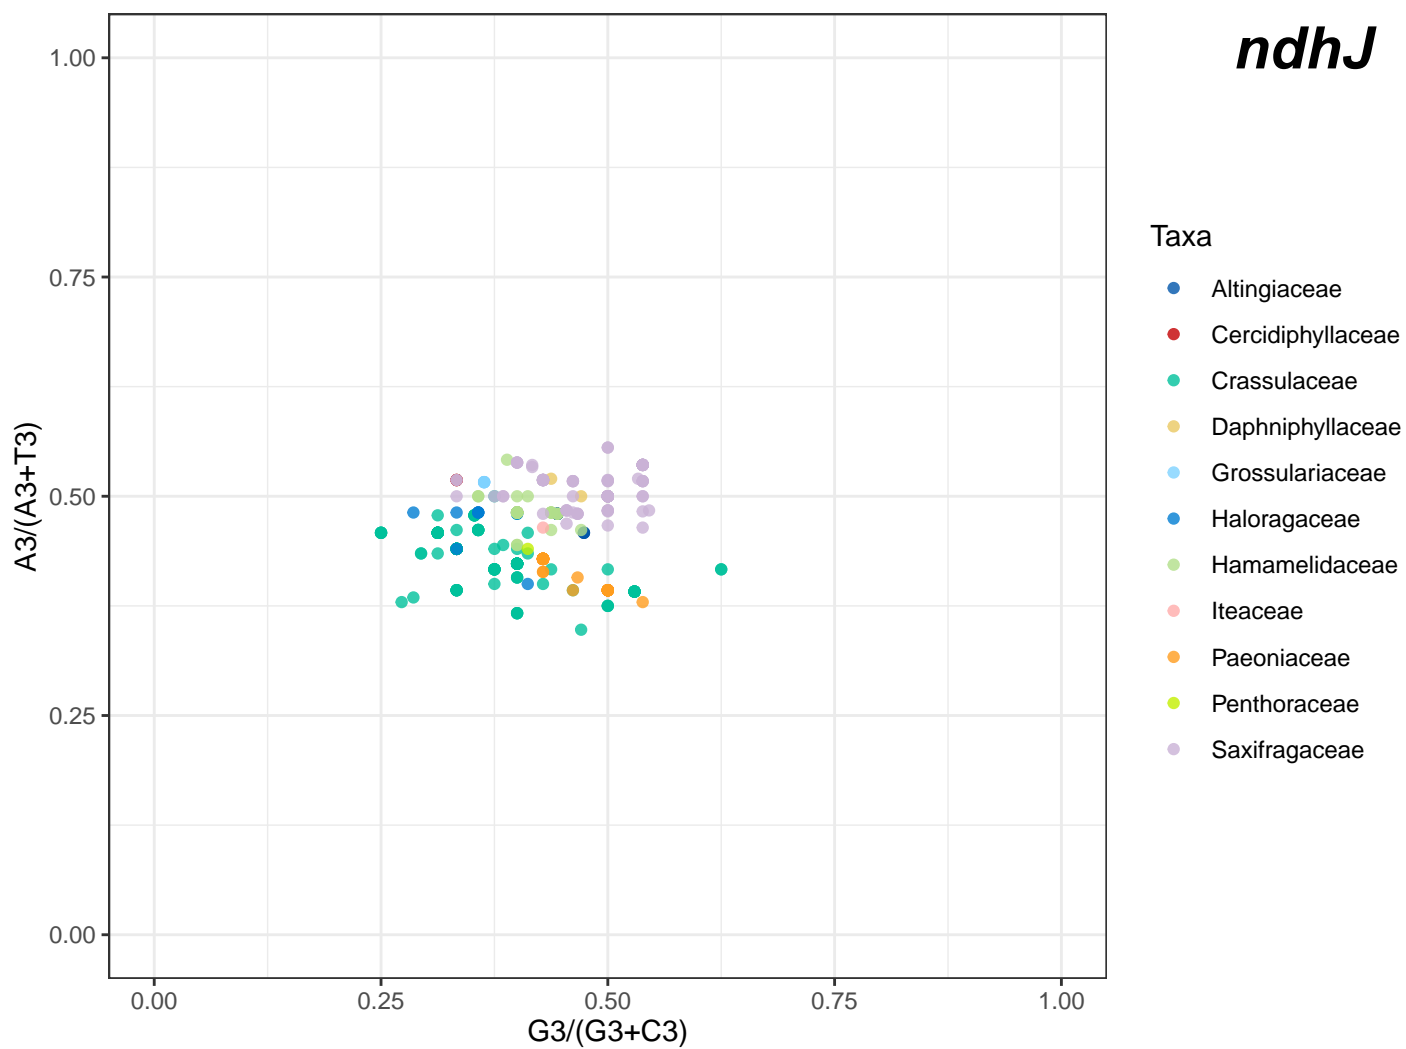

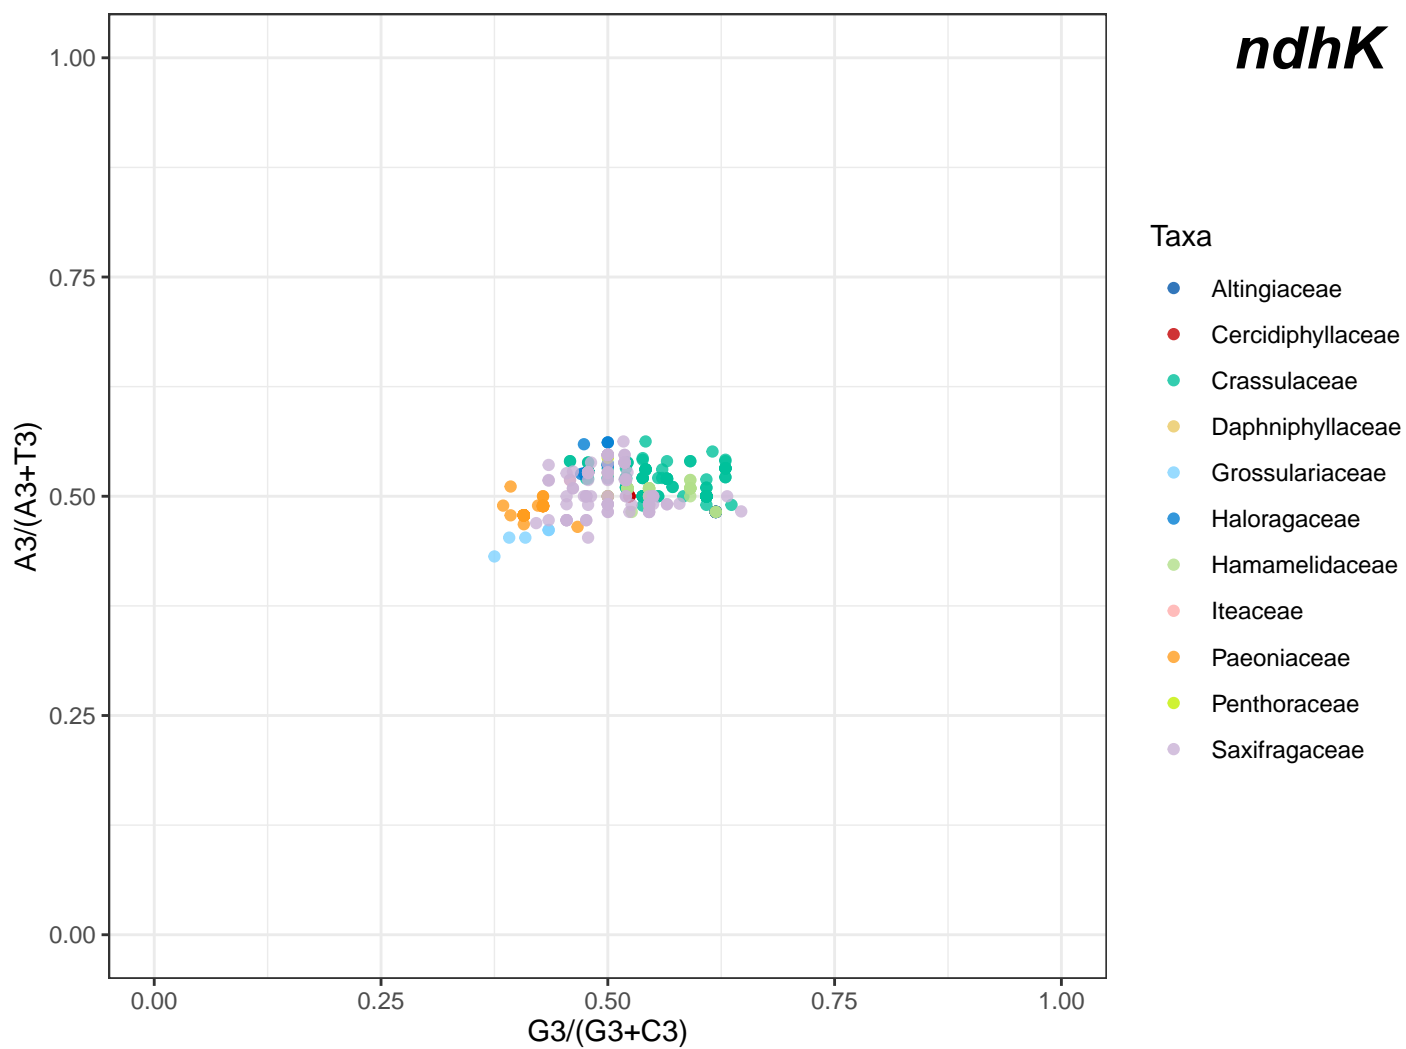

***pafil***

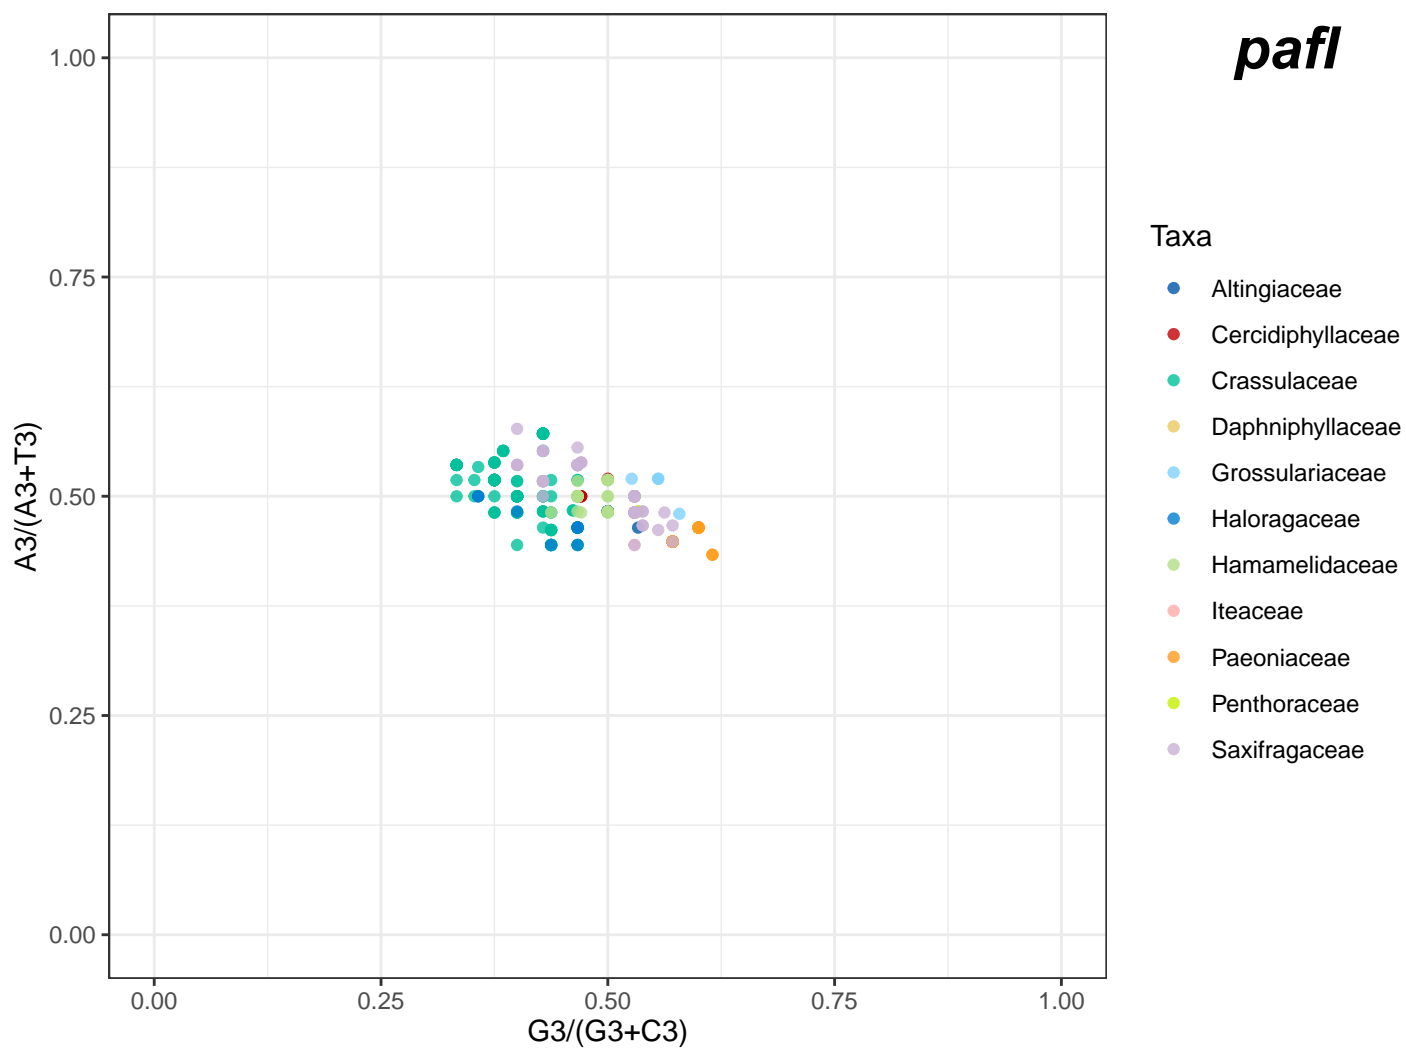

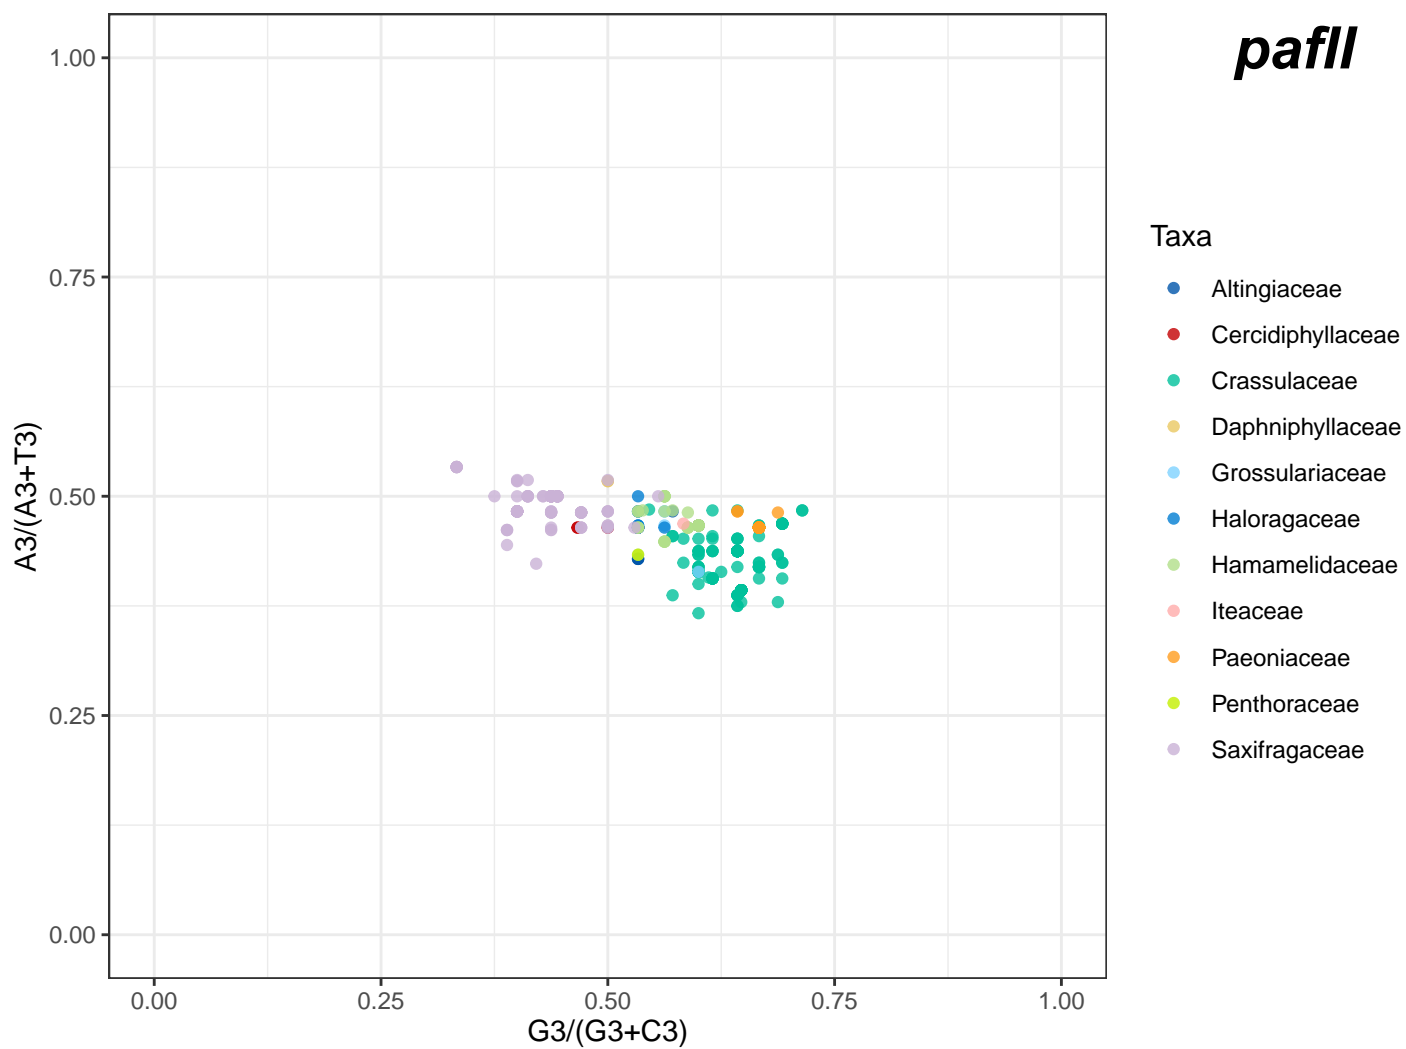

# *petA*

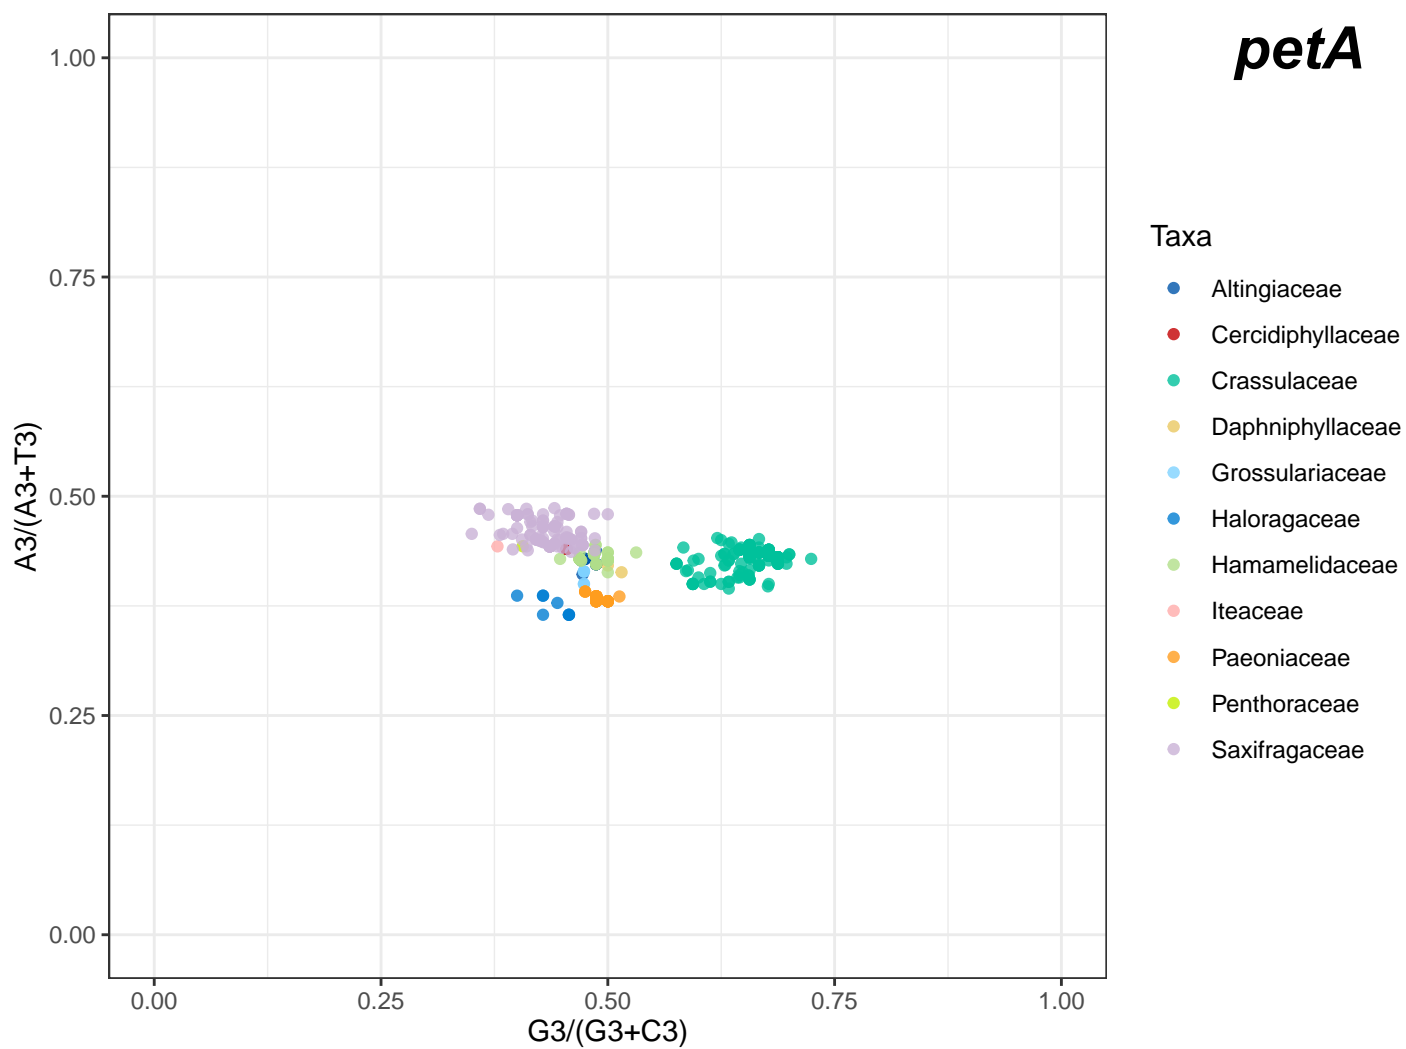



***petB***

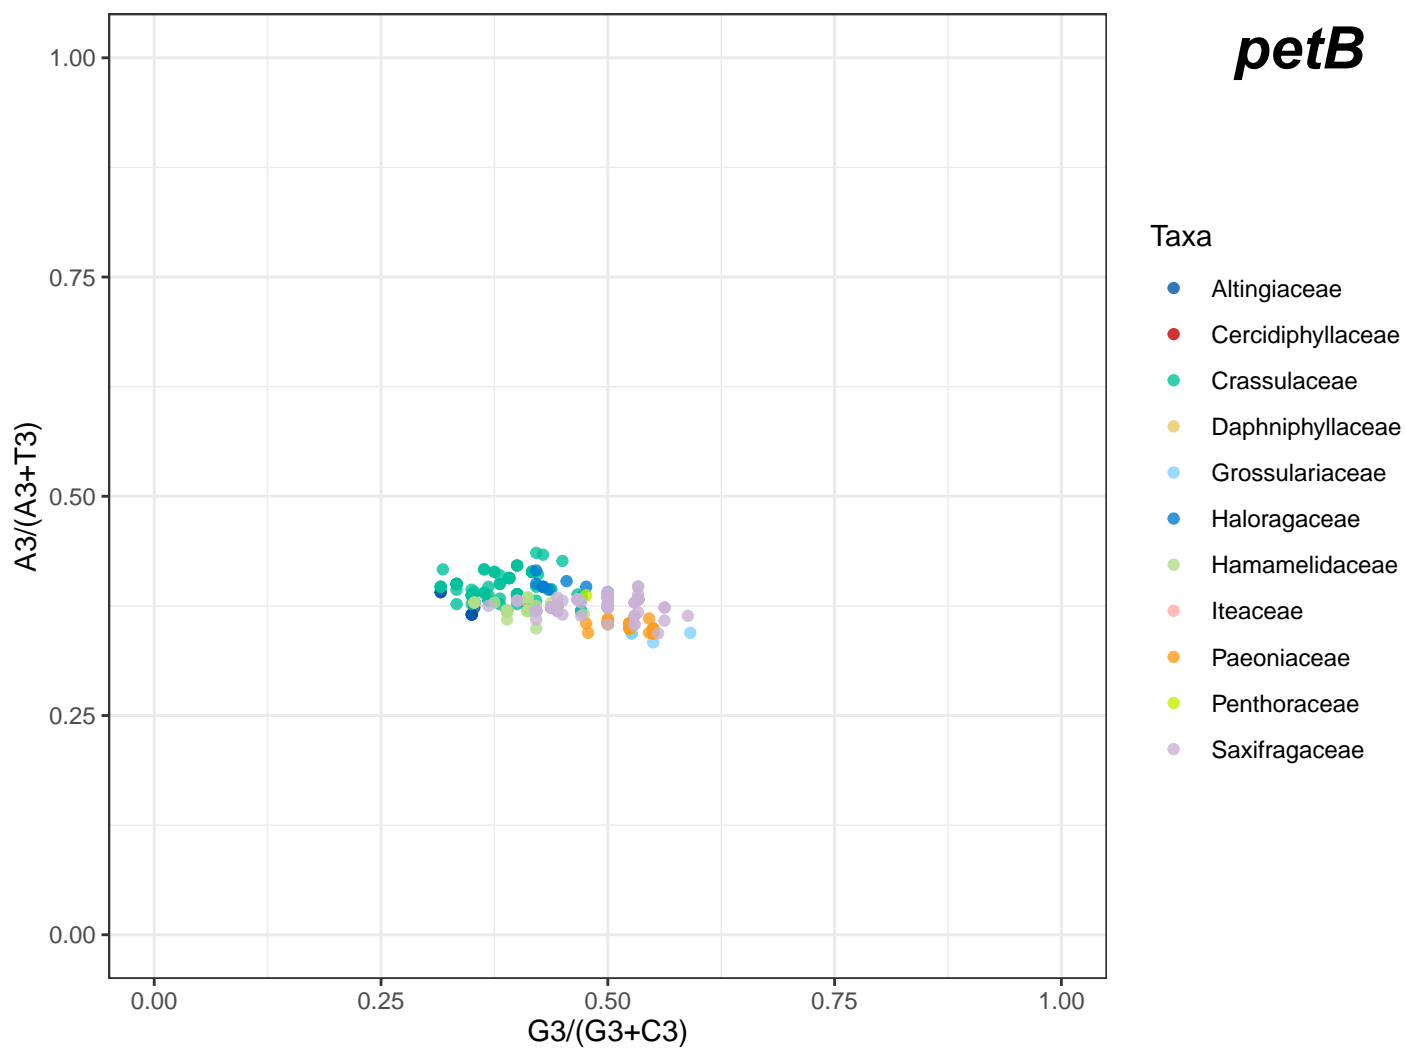

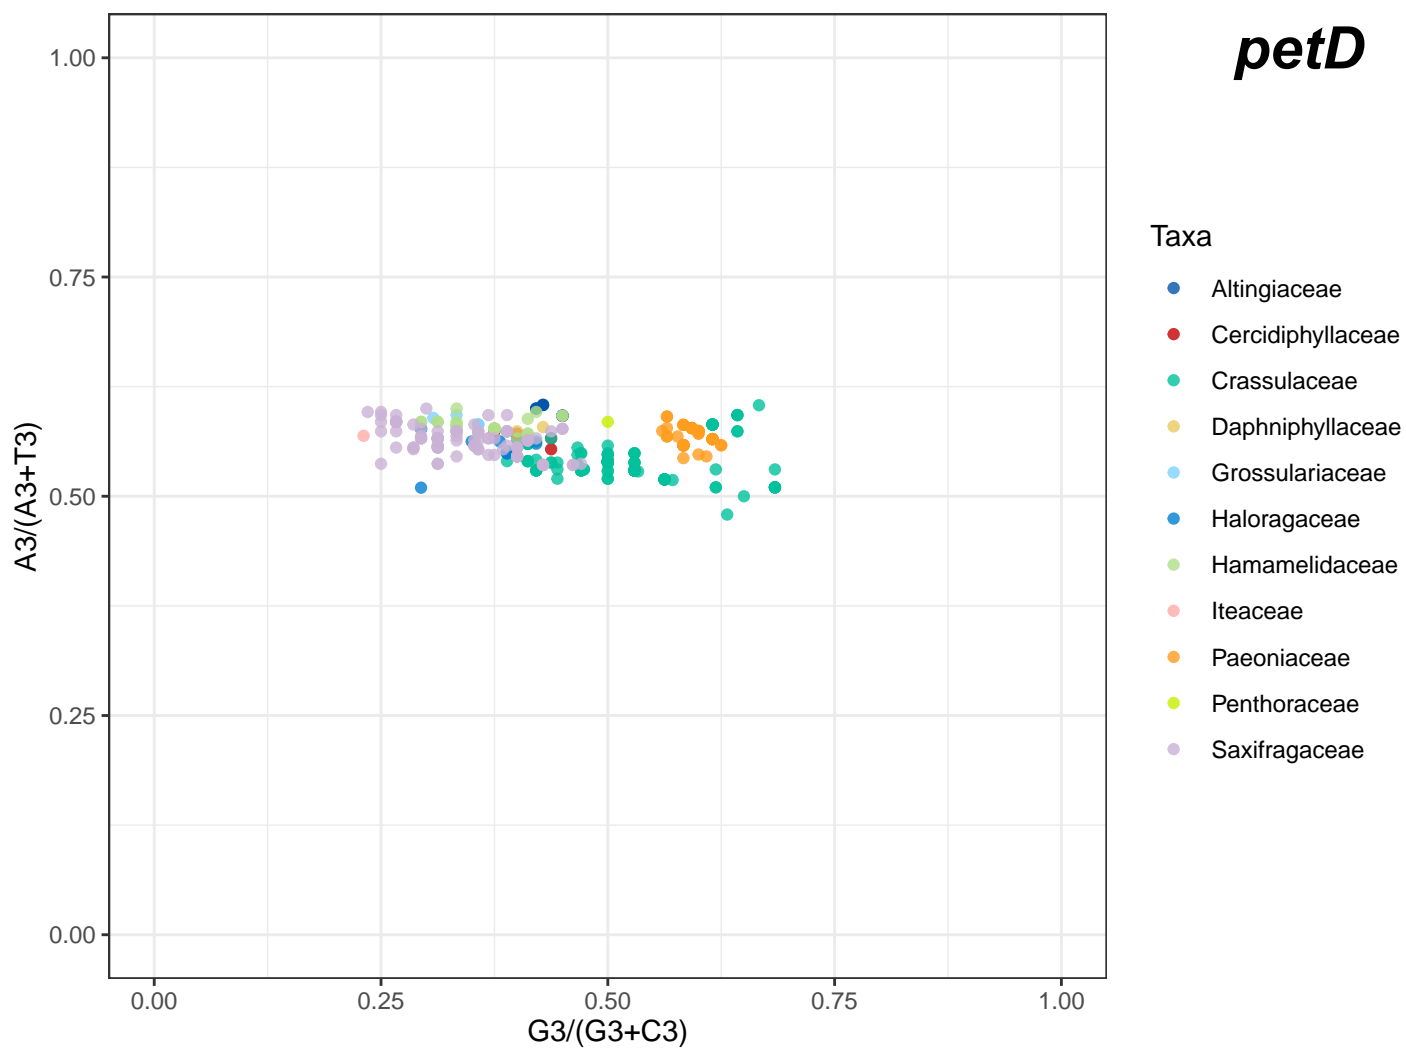

# *psaA*

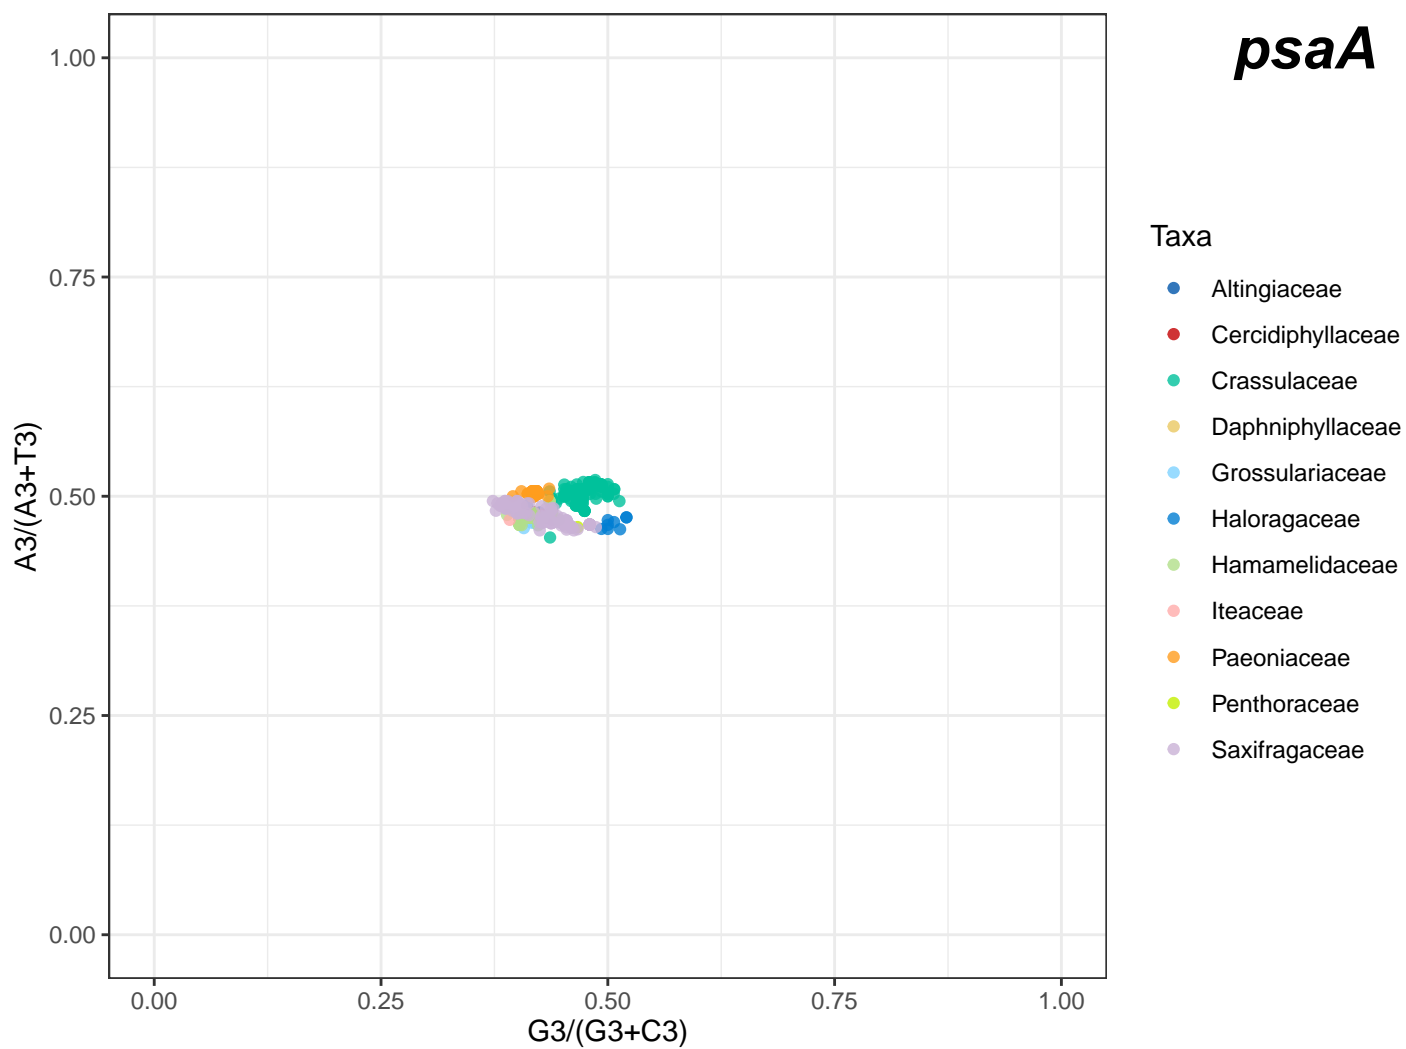

# *psaB*

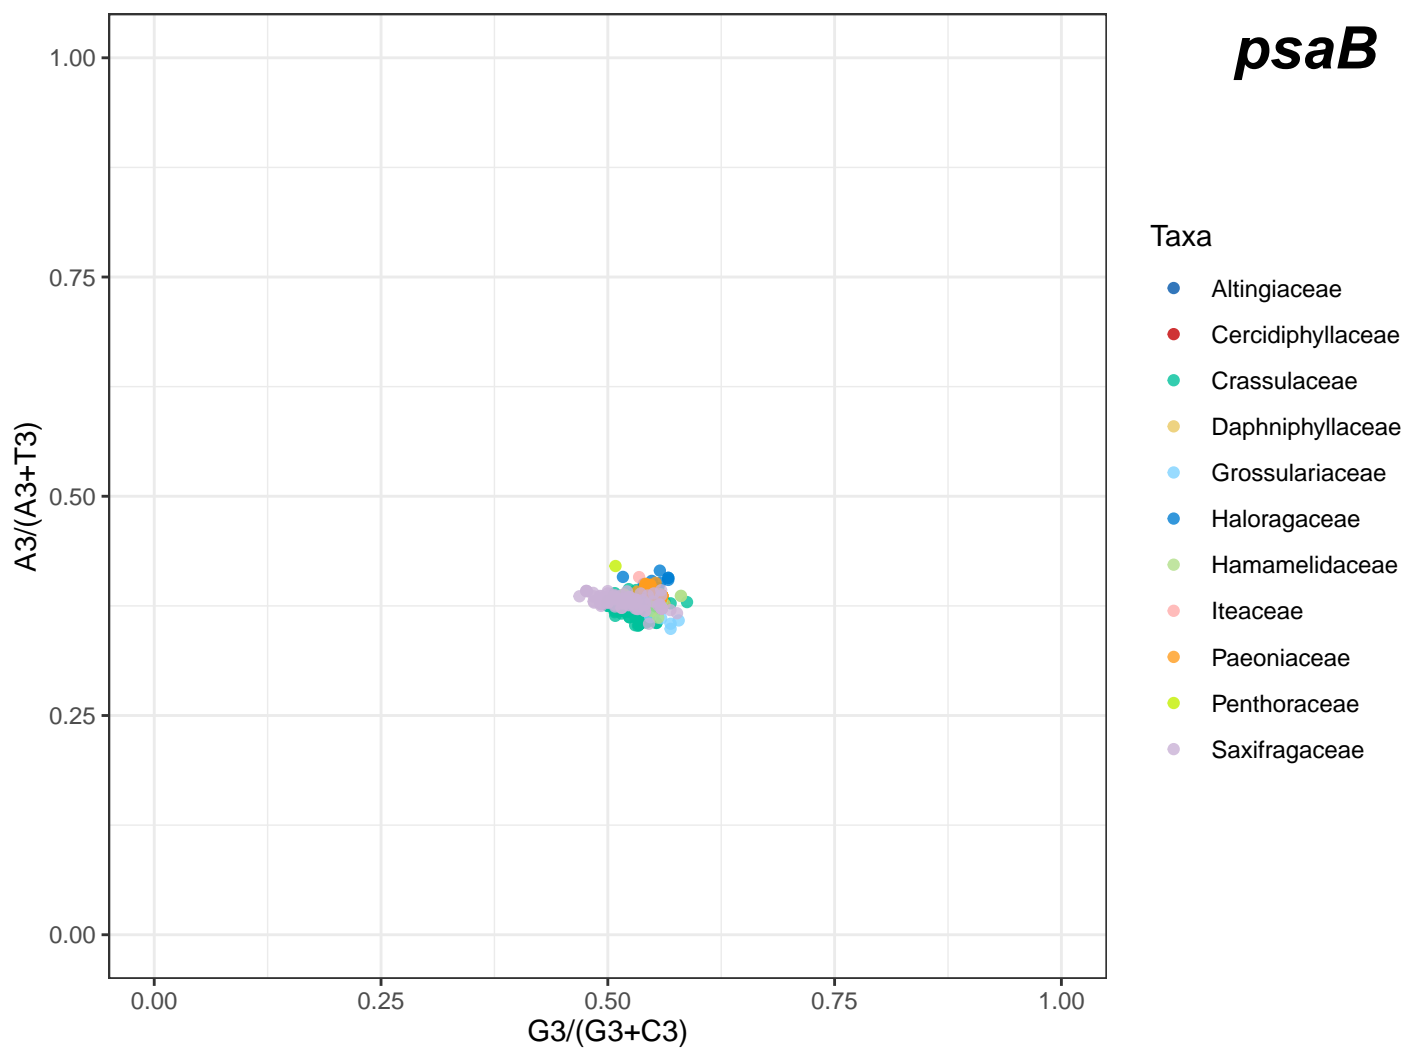

# *psbA*

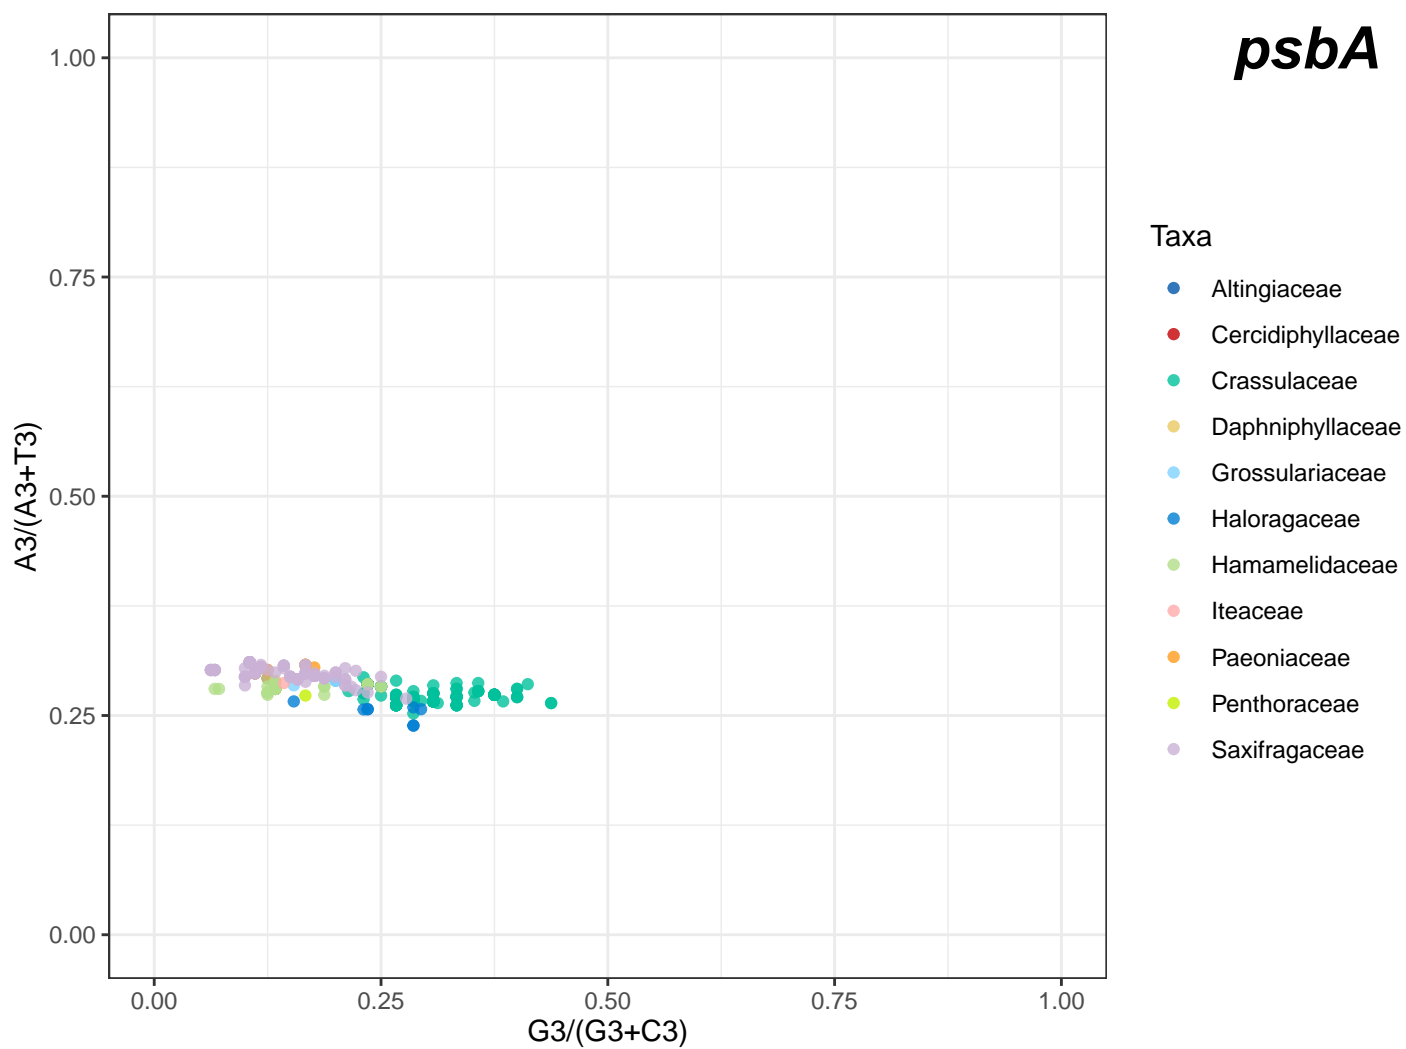

# *psbB*

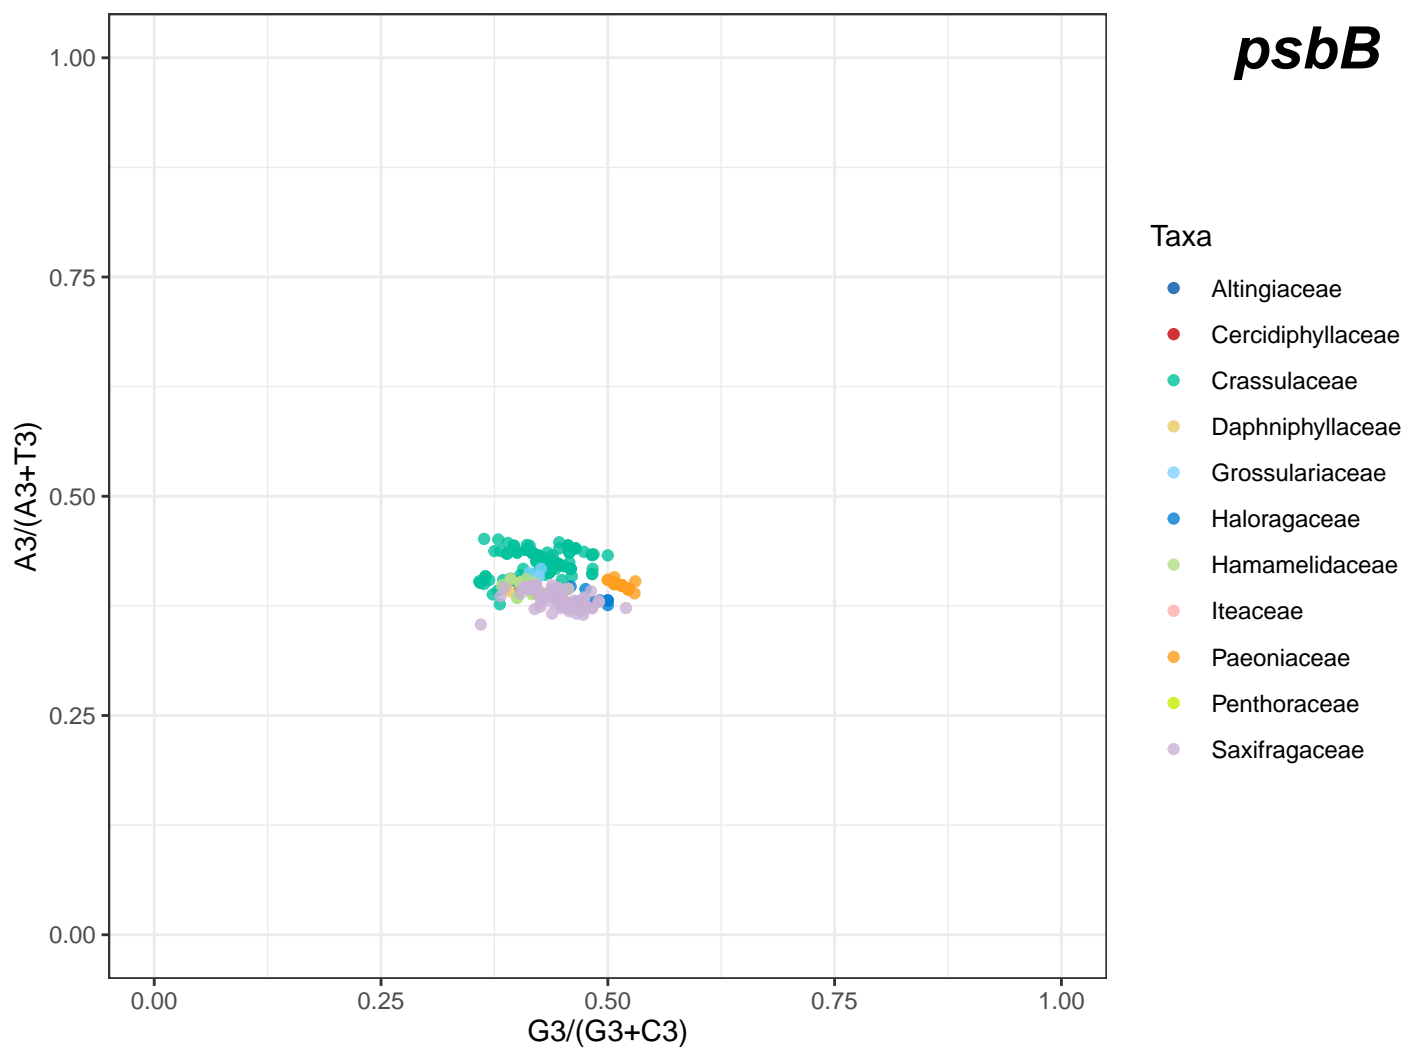

# *psbC*

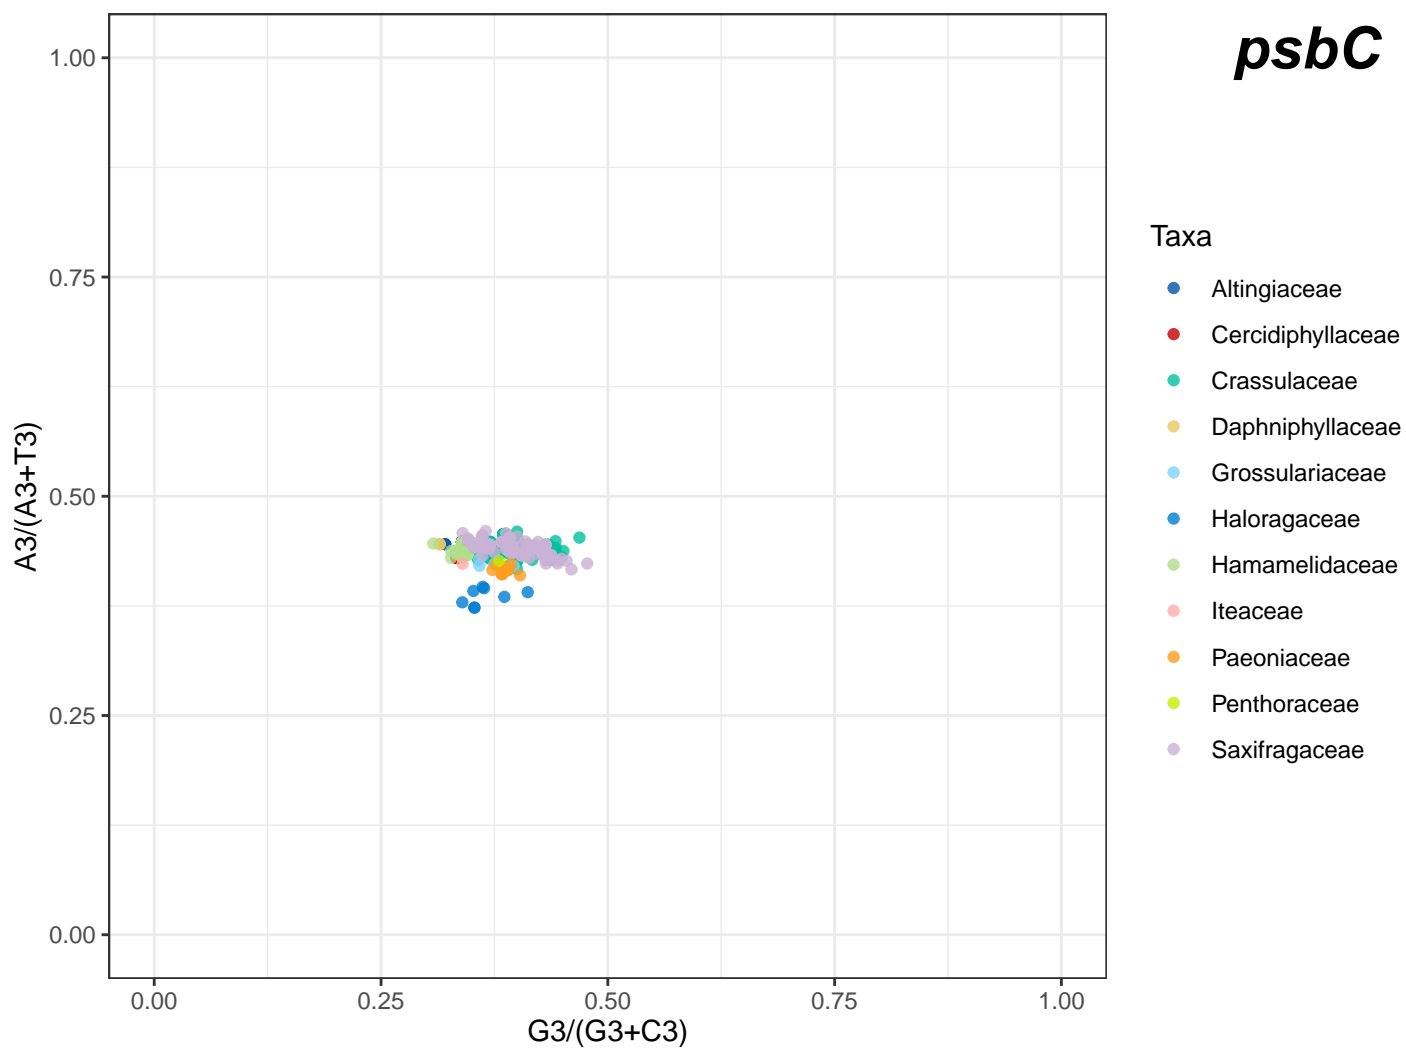

# *psbD*

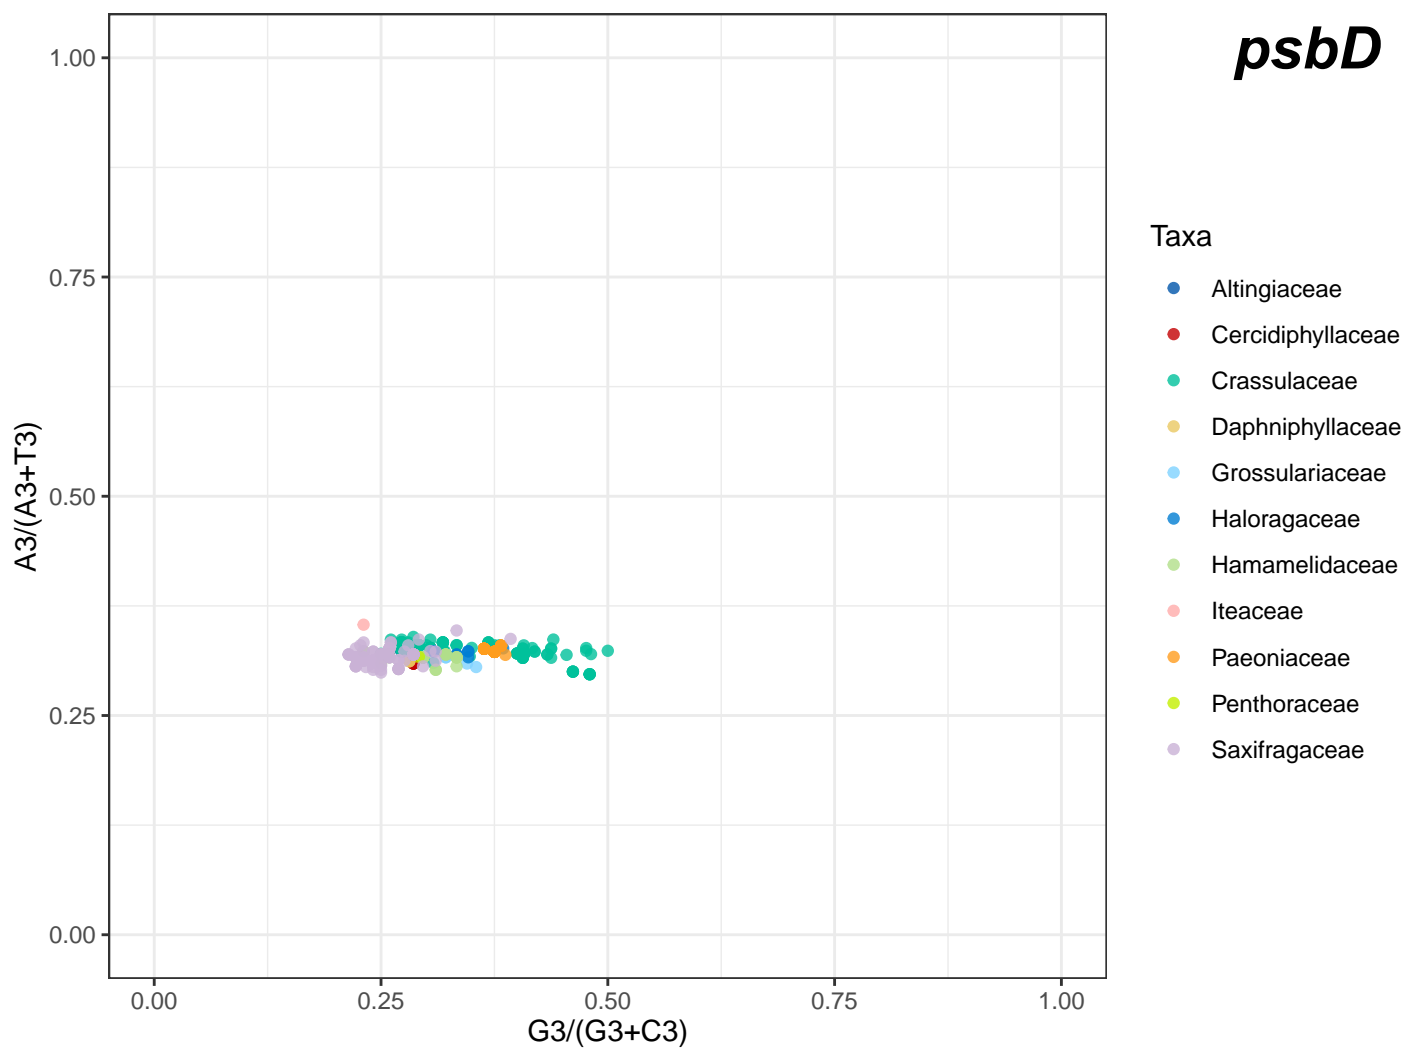



***rbcL***

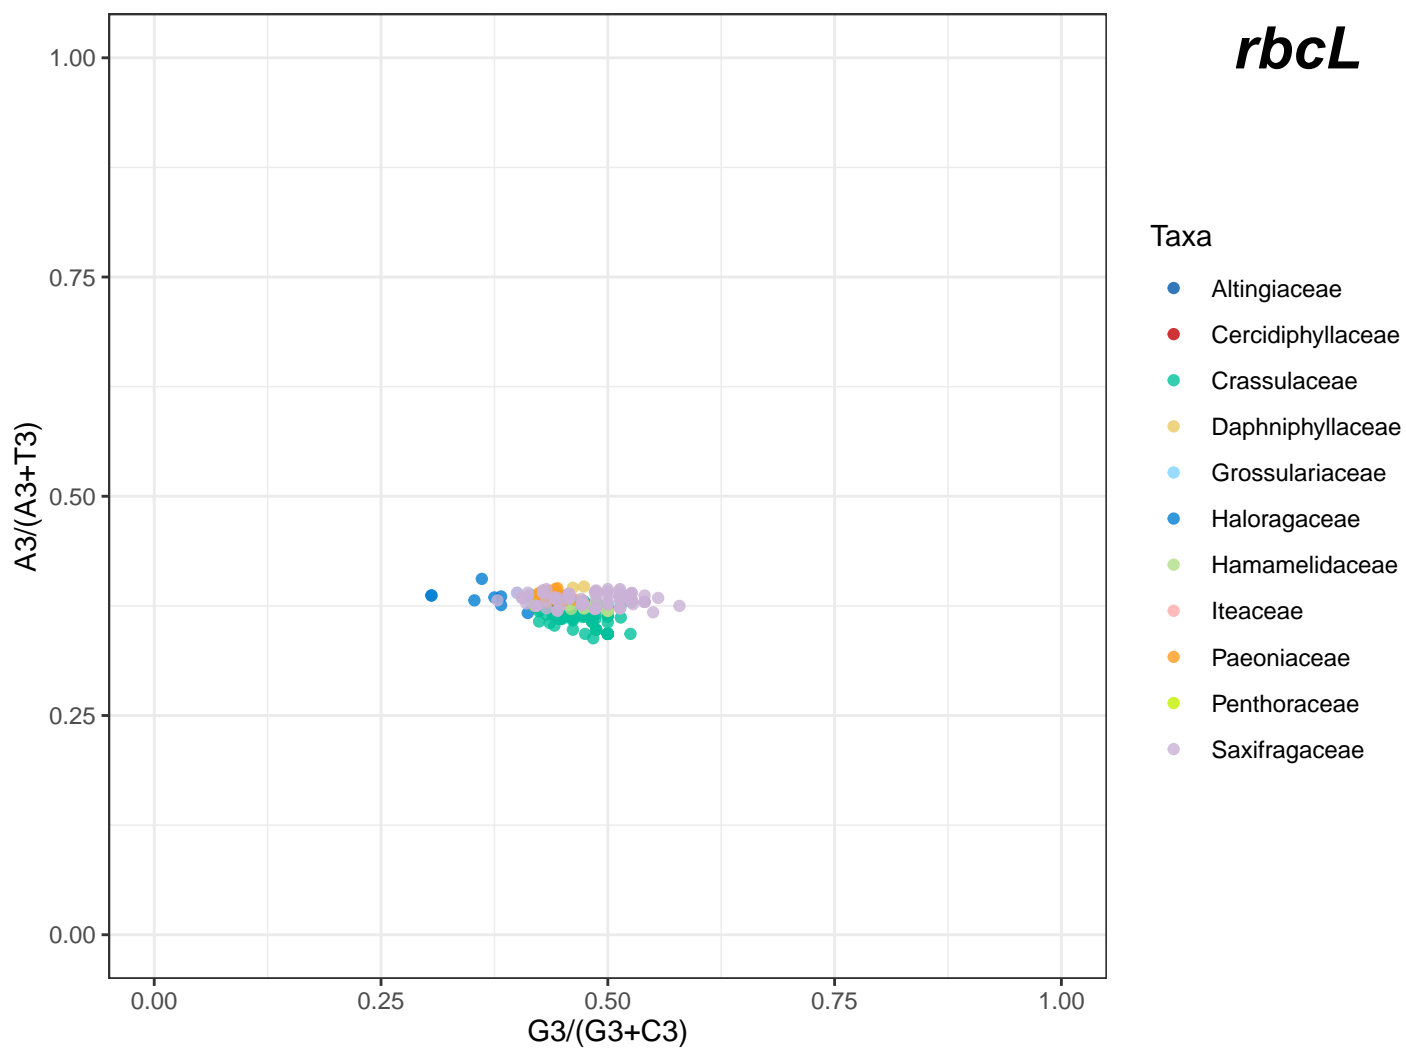

***rpl2***

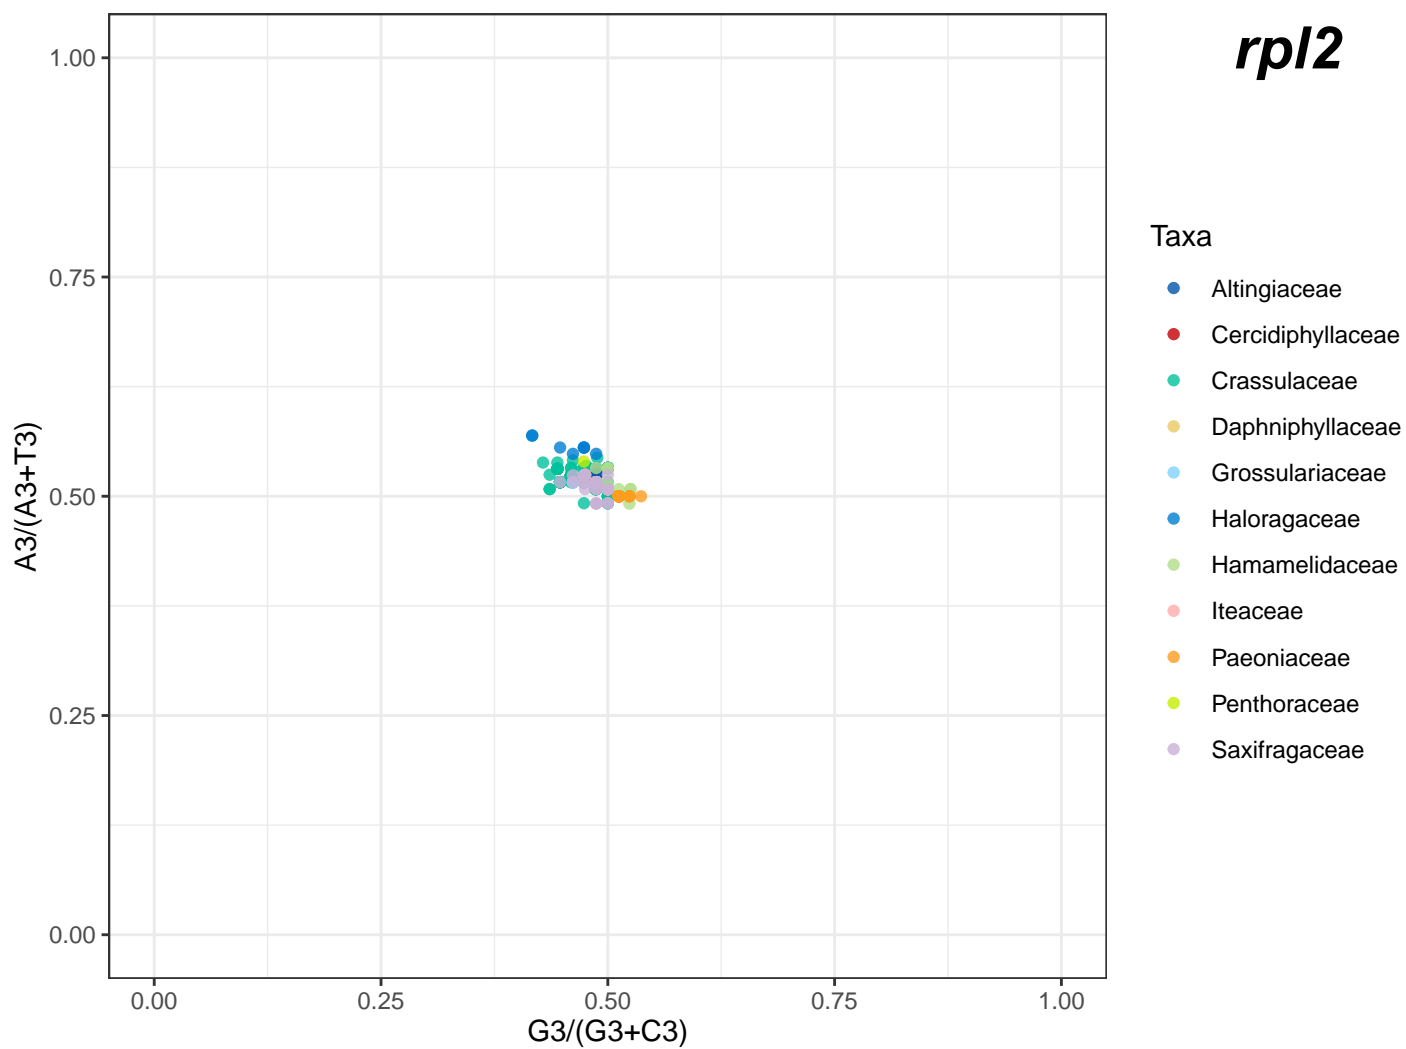

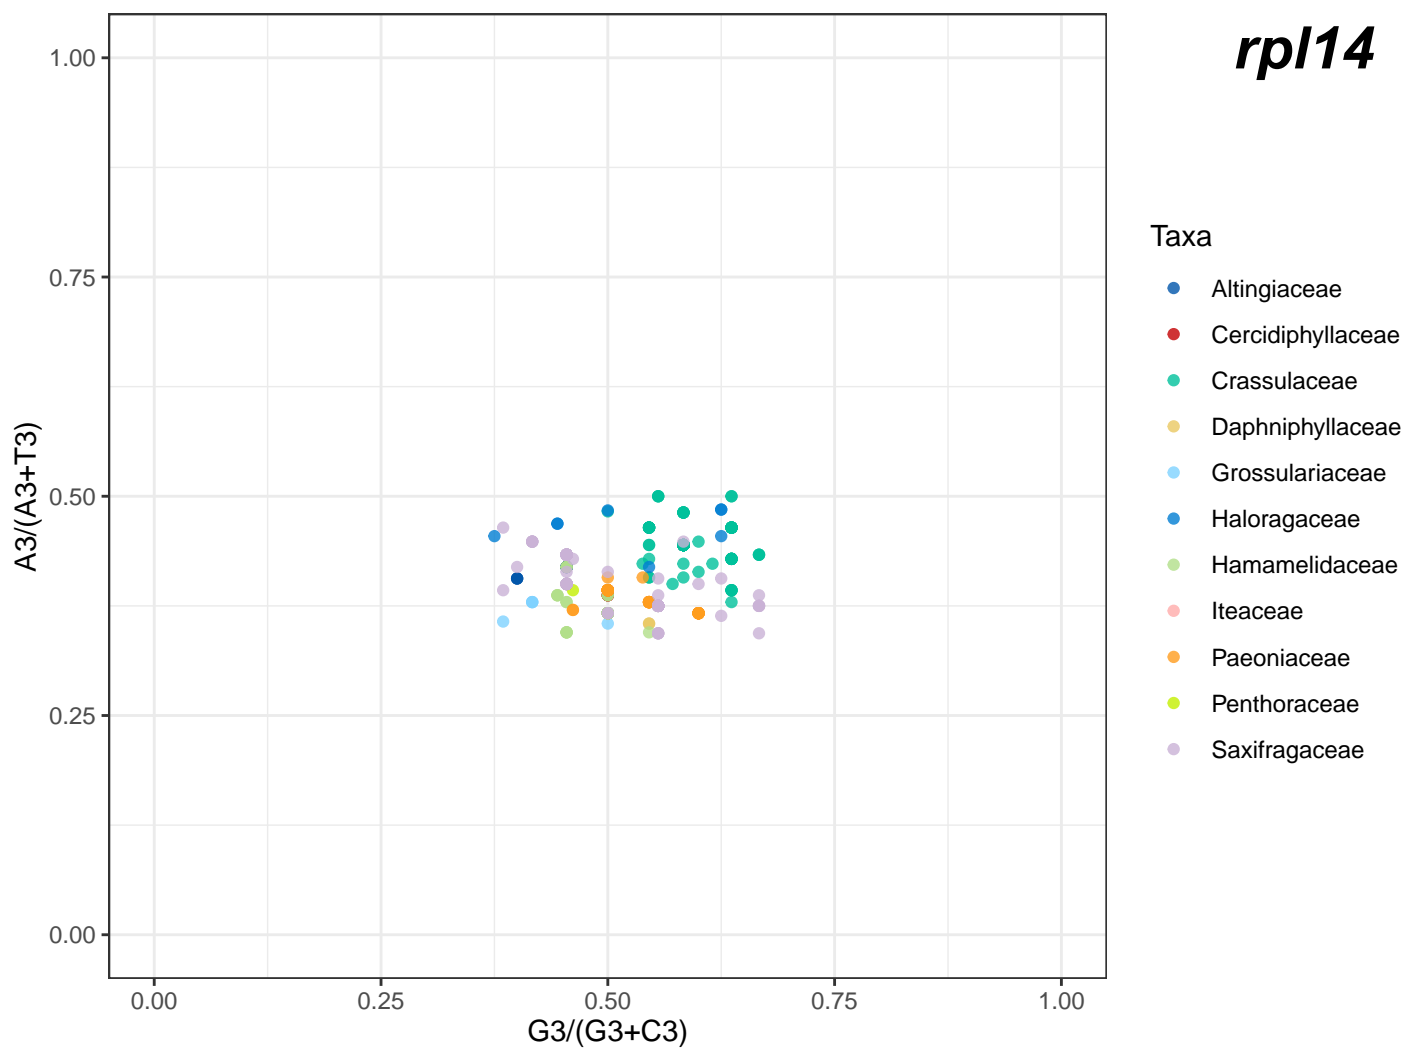

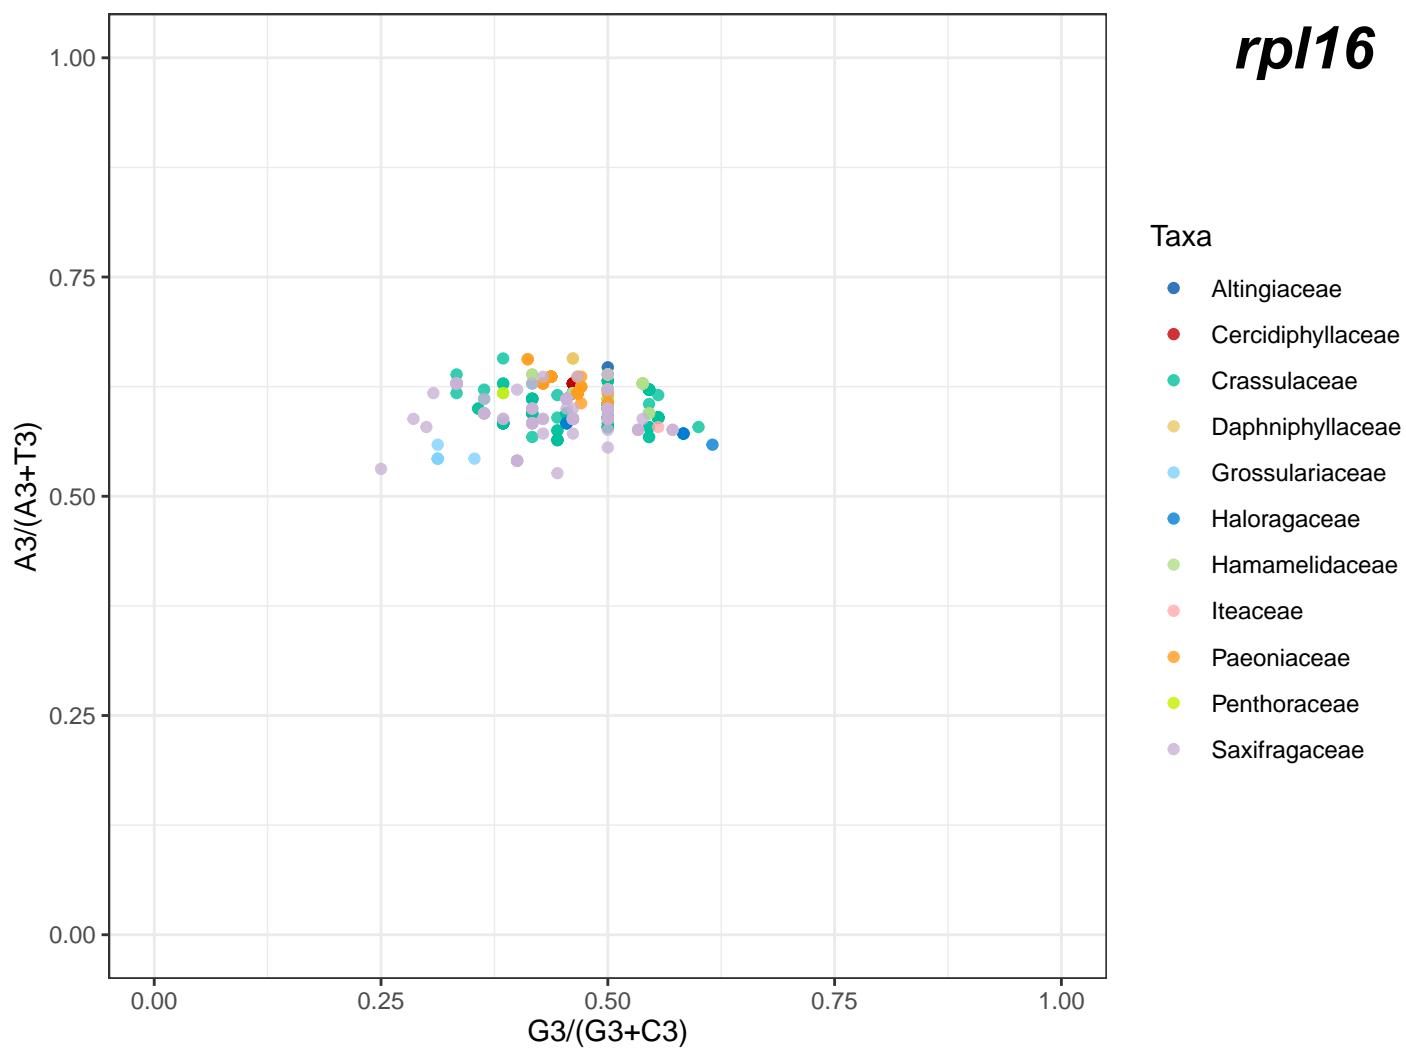

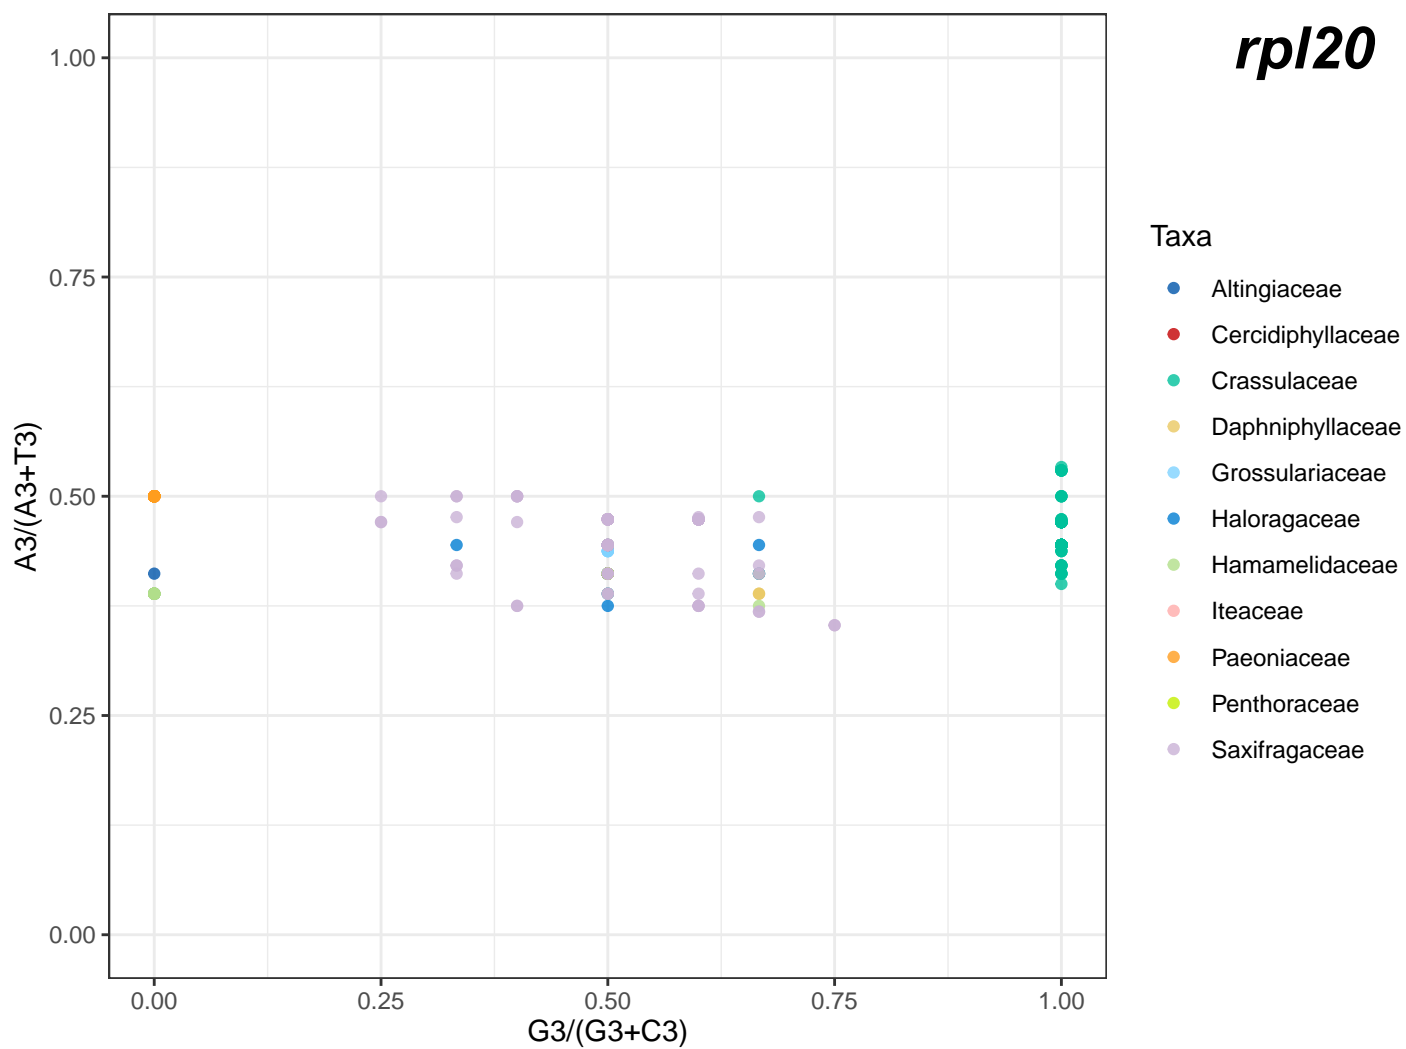

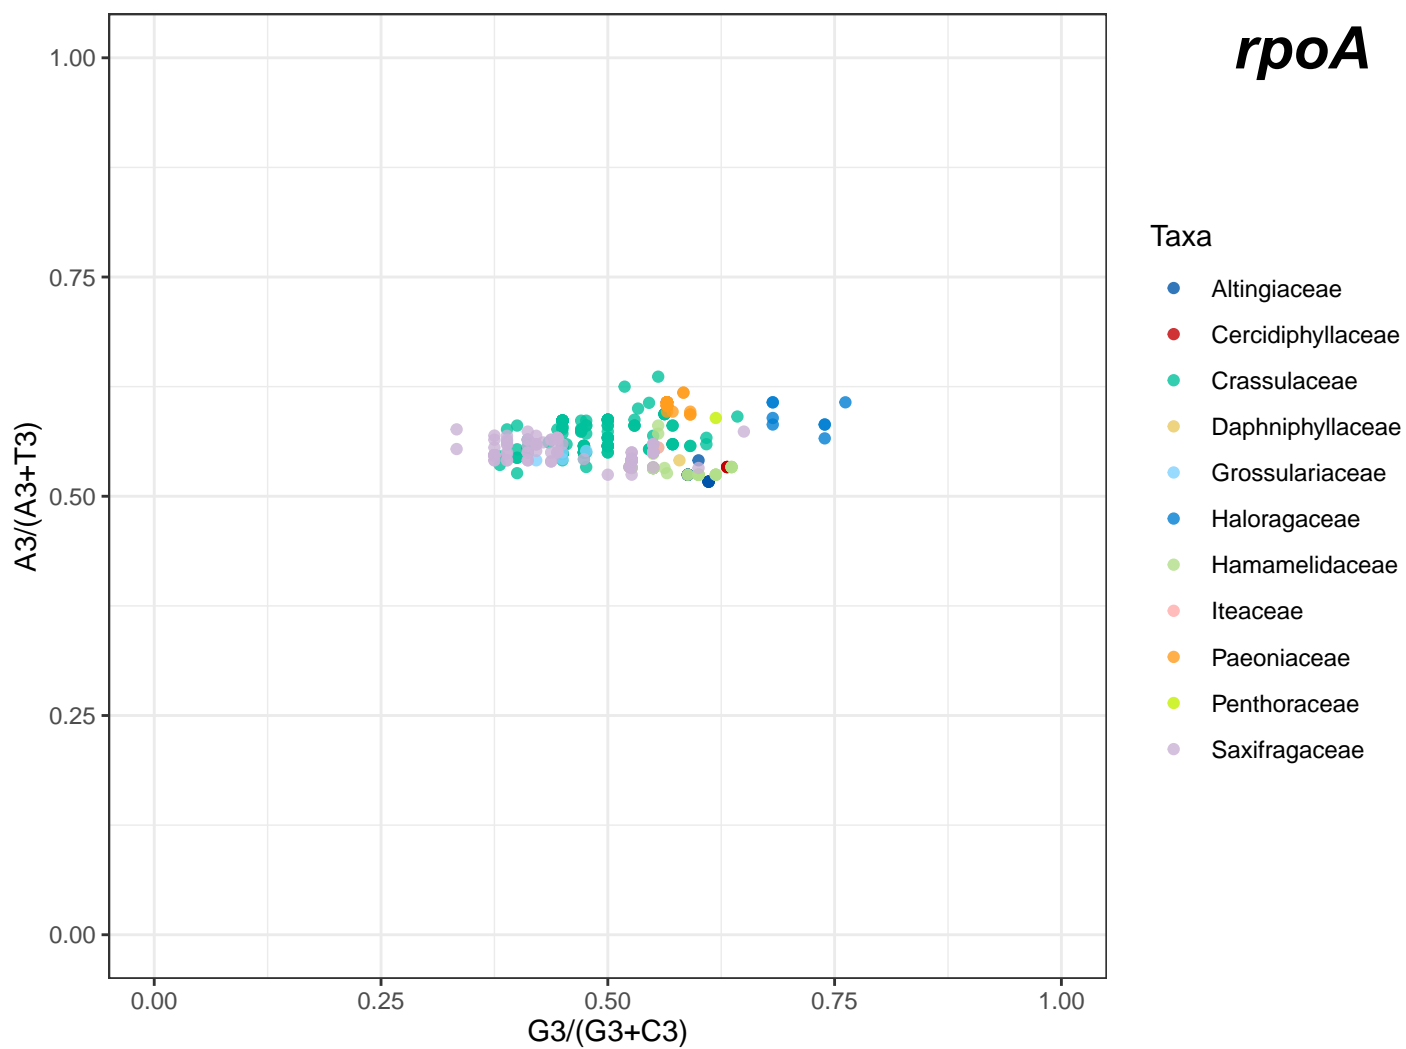

***rpoB***

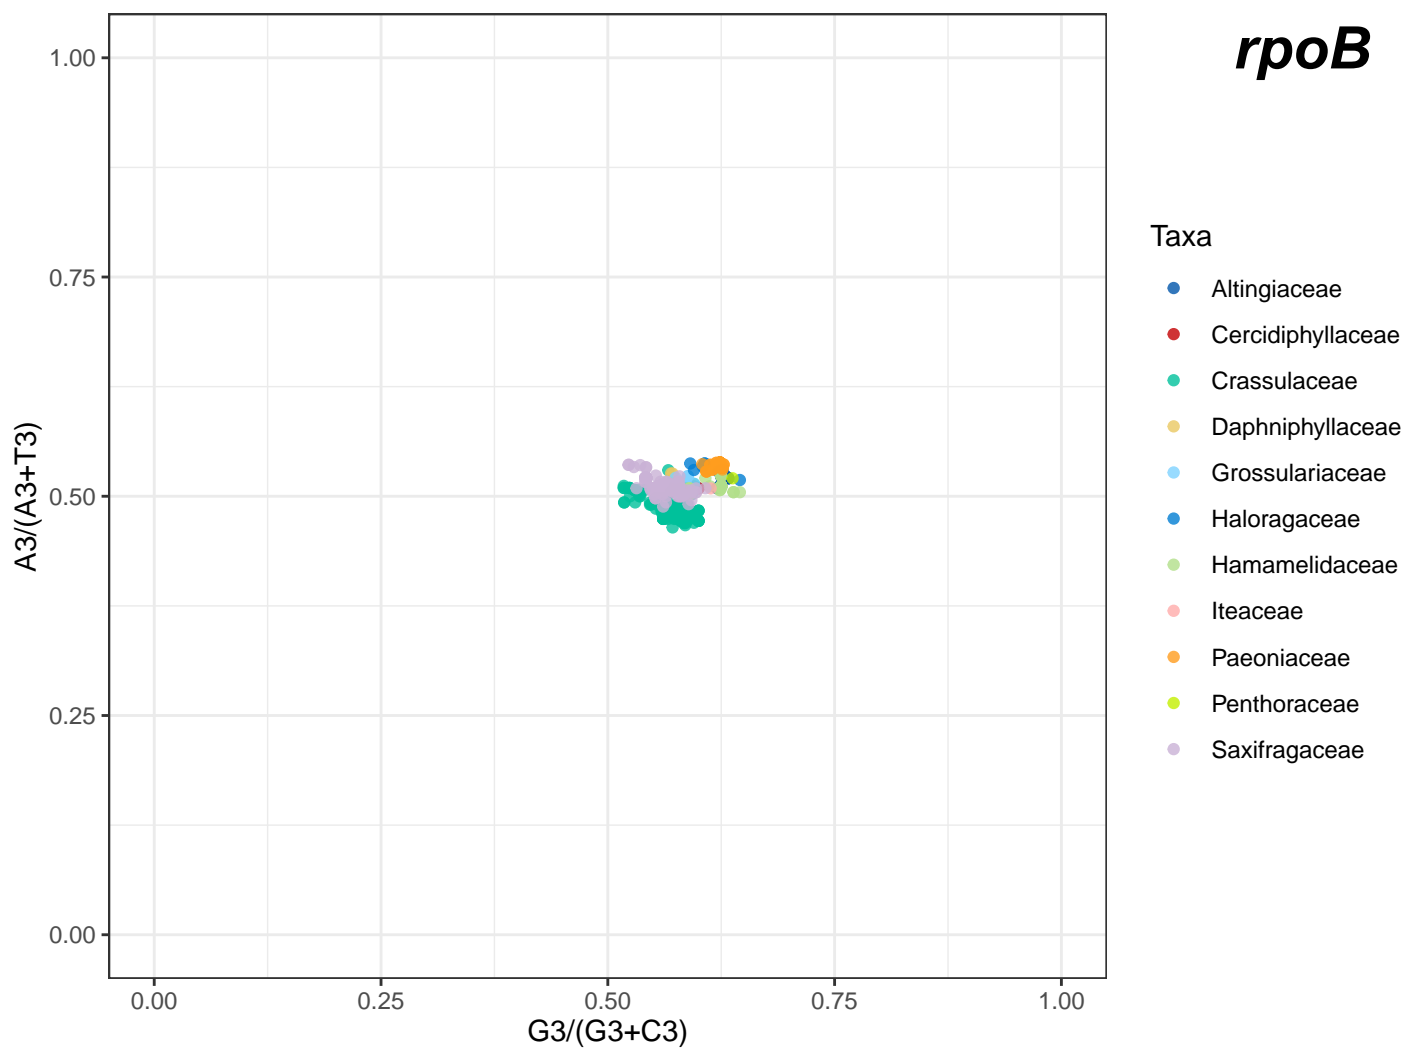

# *rpoC1*

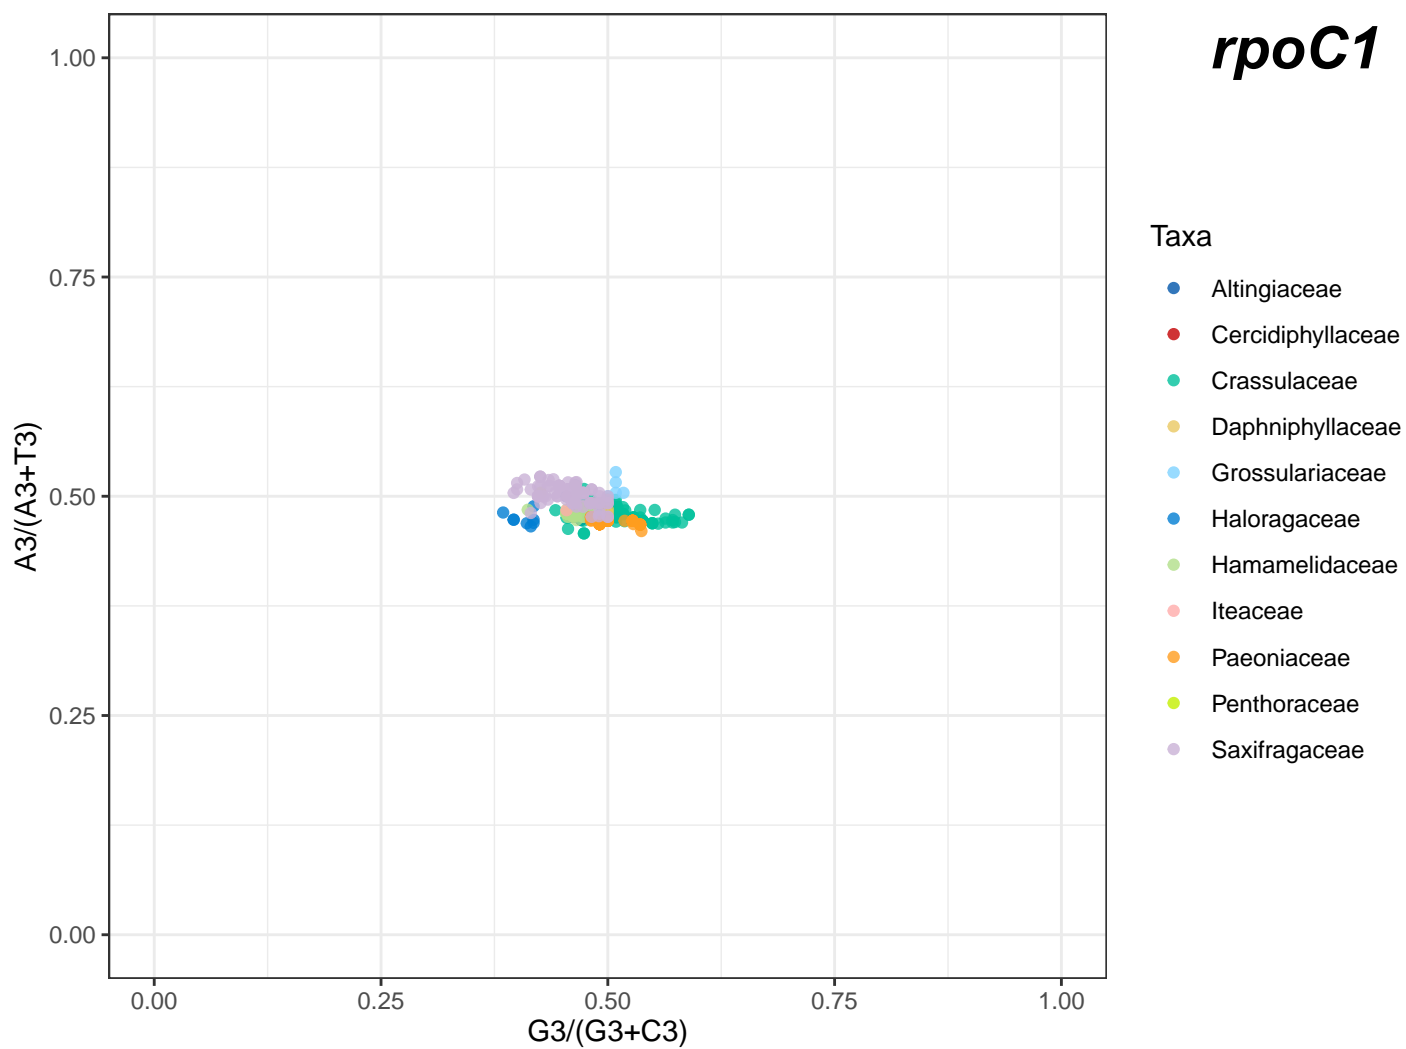



# *rpoC2*

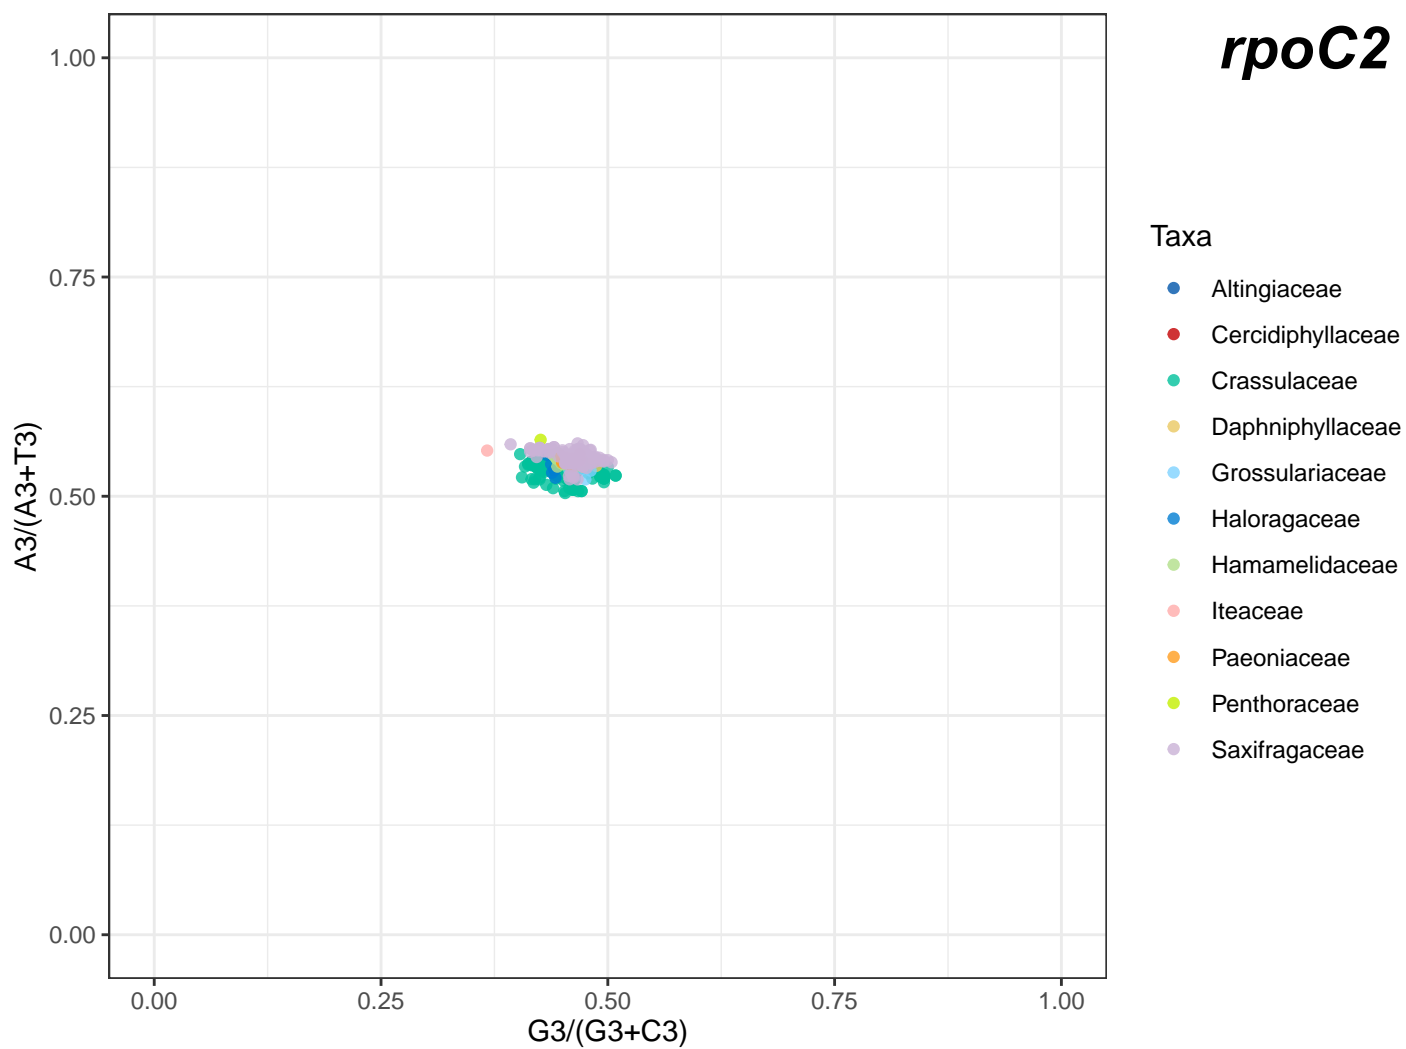

***rps2***

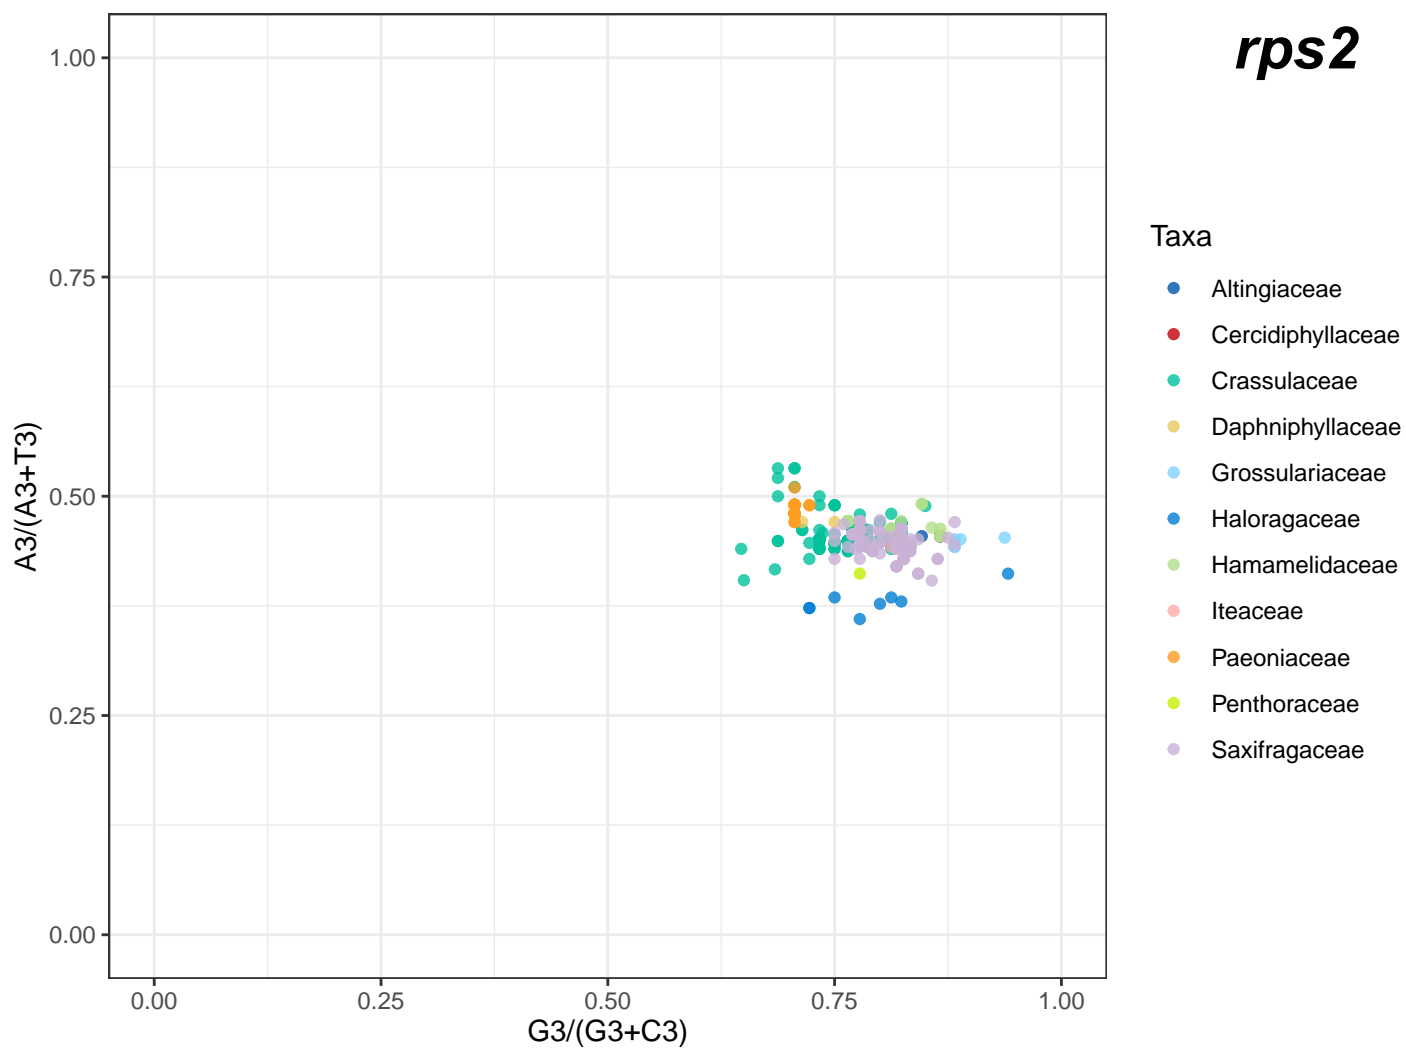

***rps3***

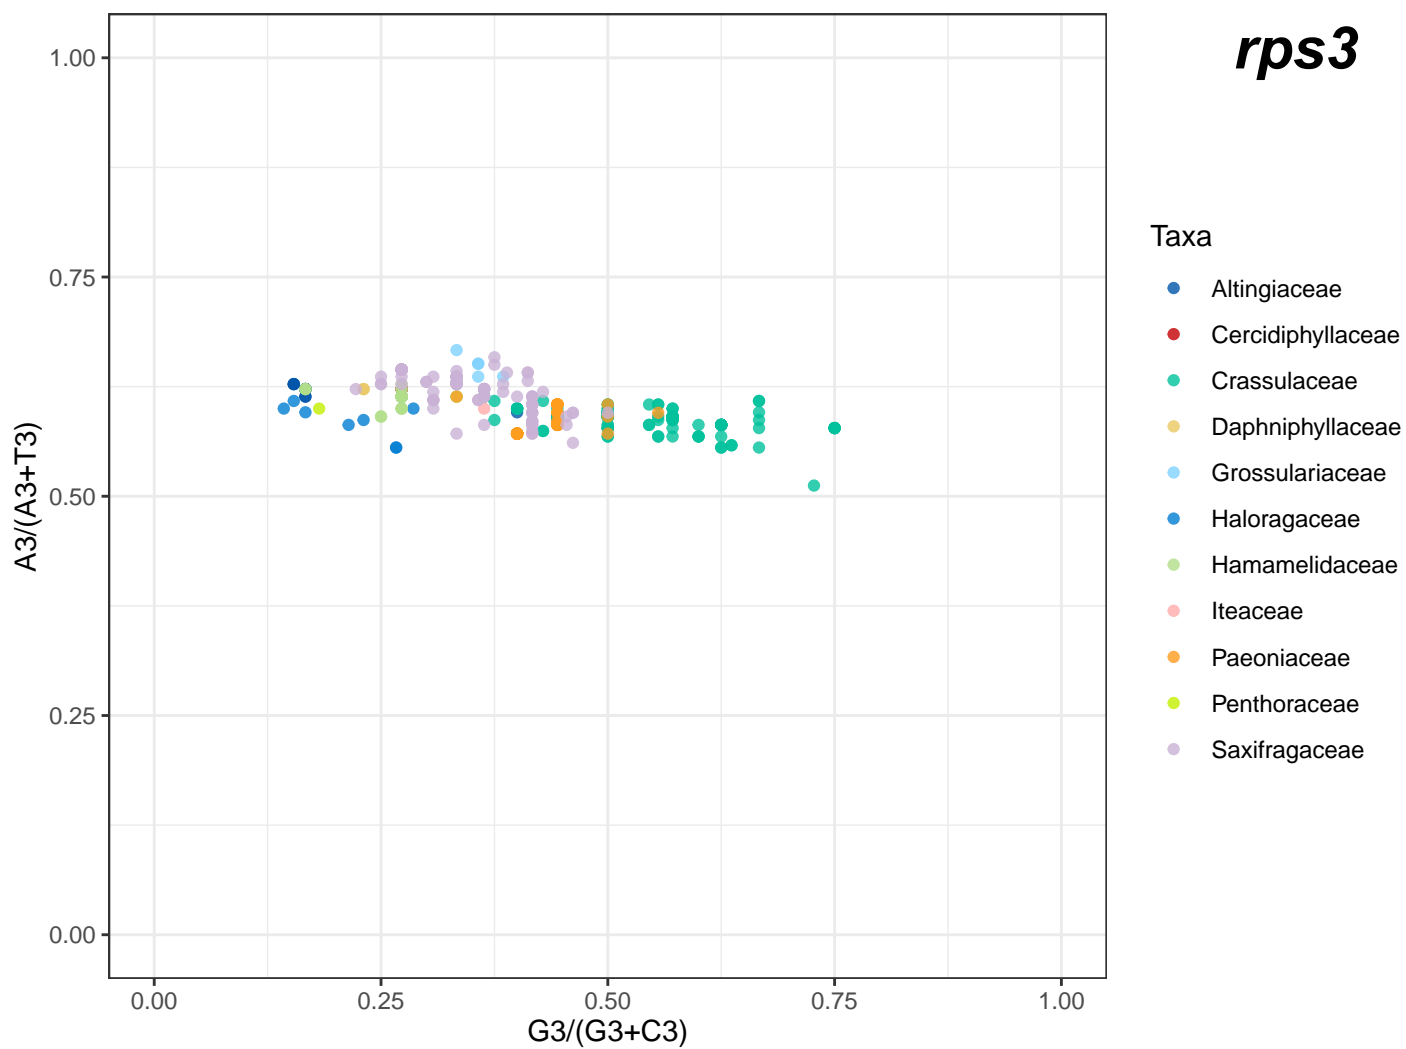

# *rps4*

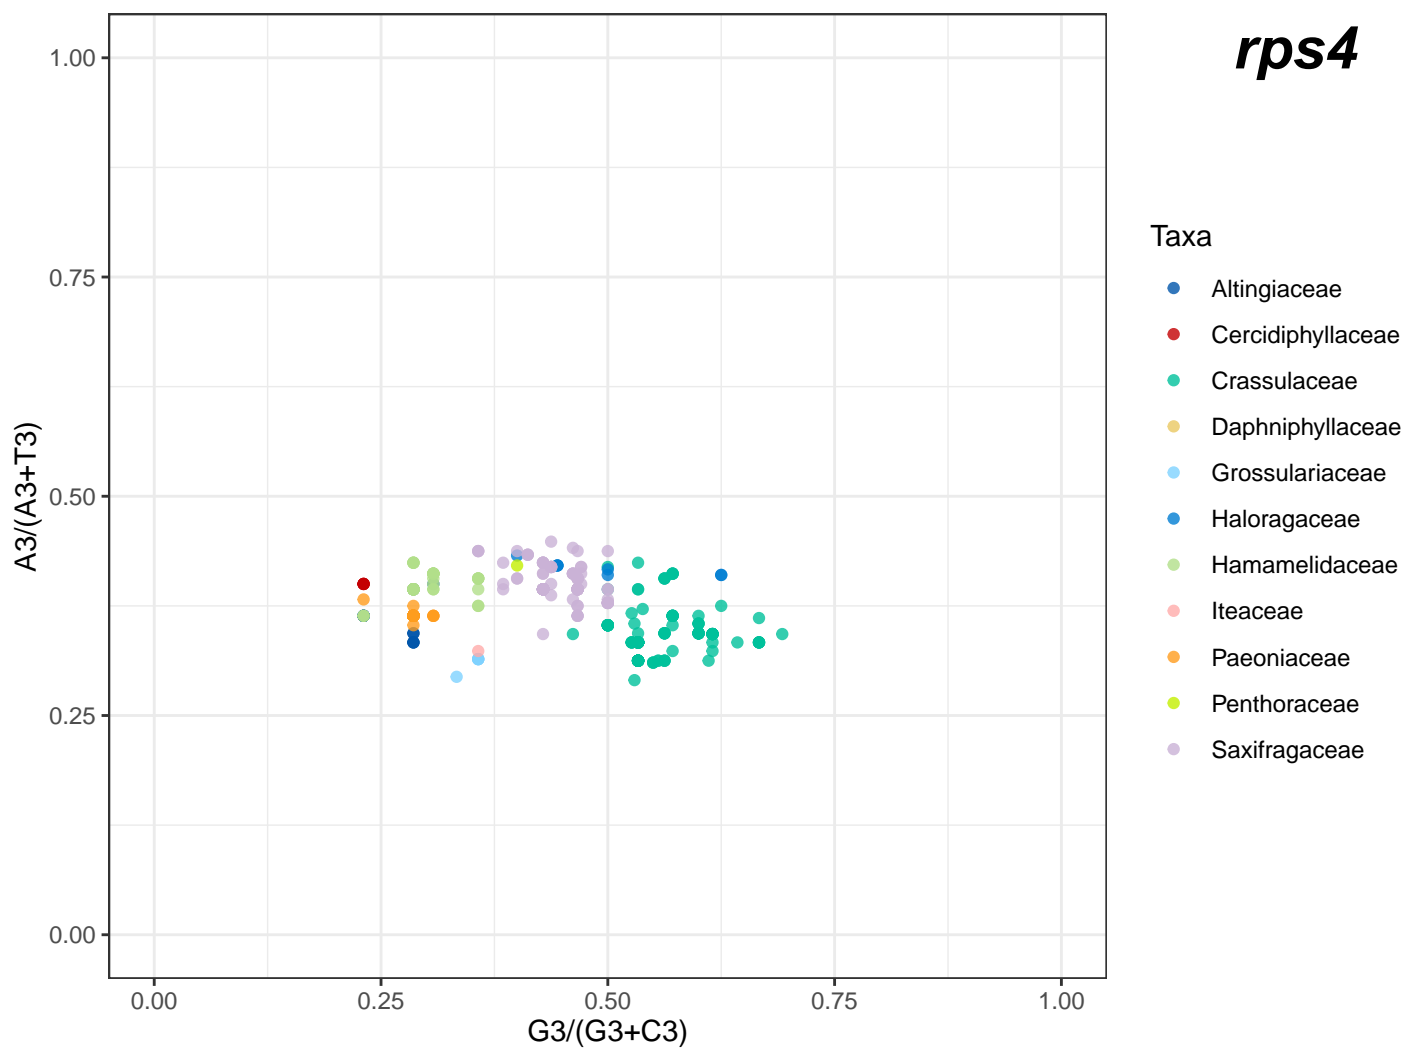

***rps7***

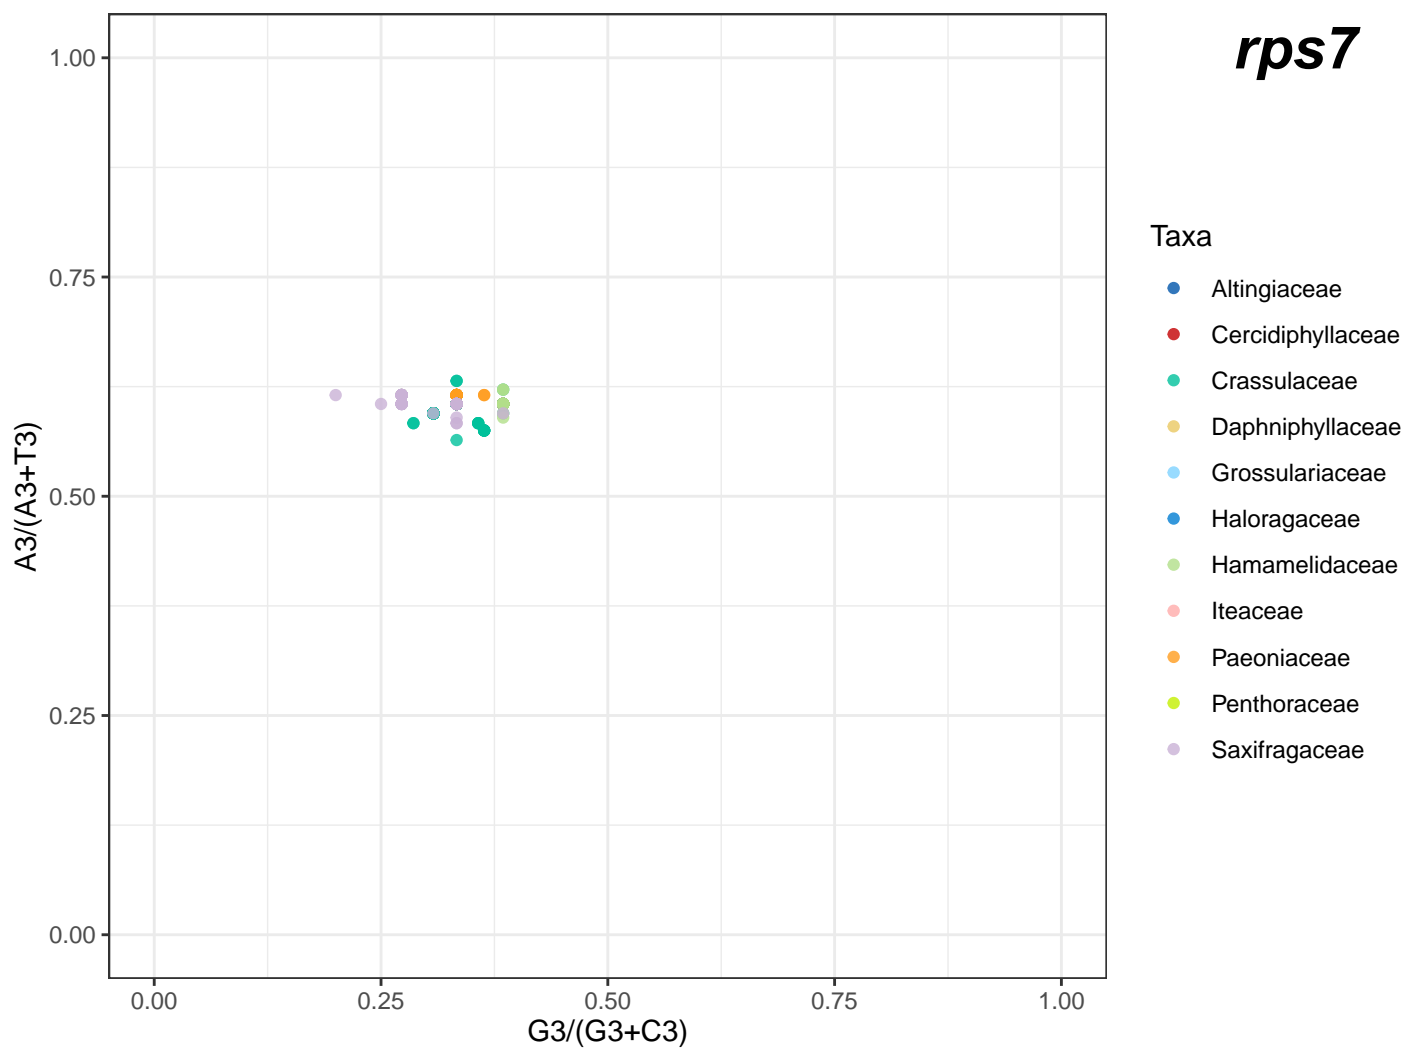

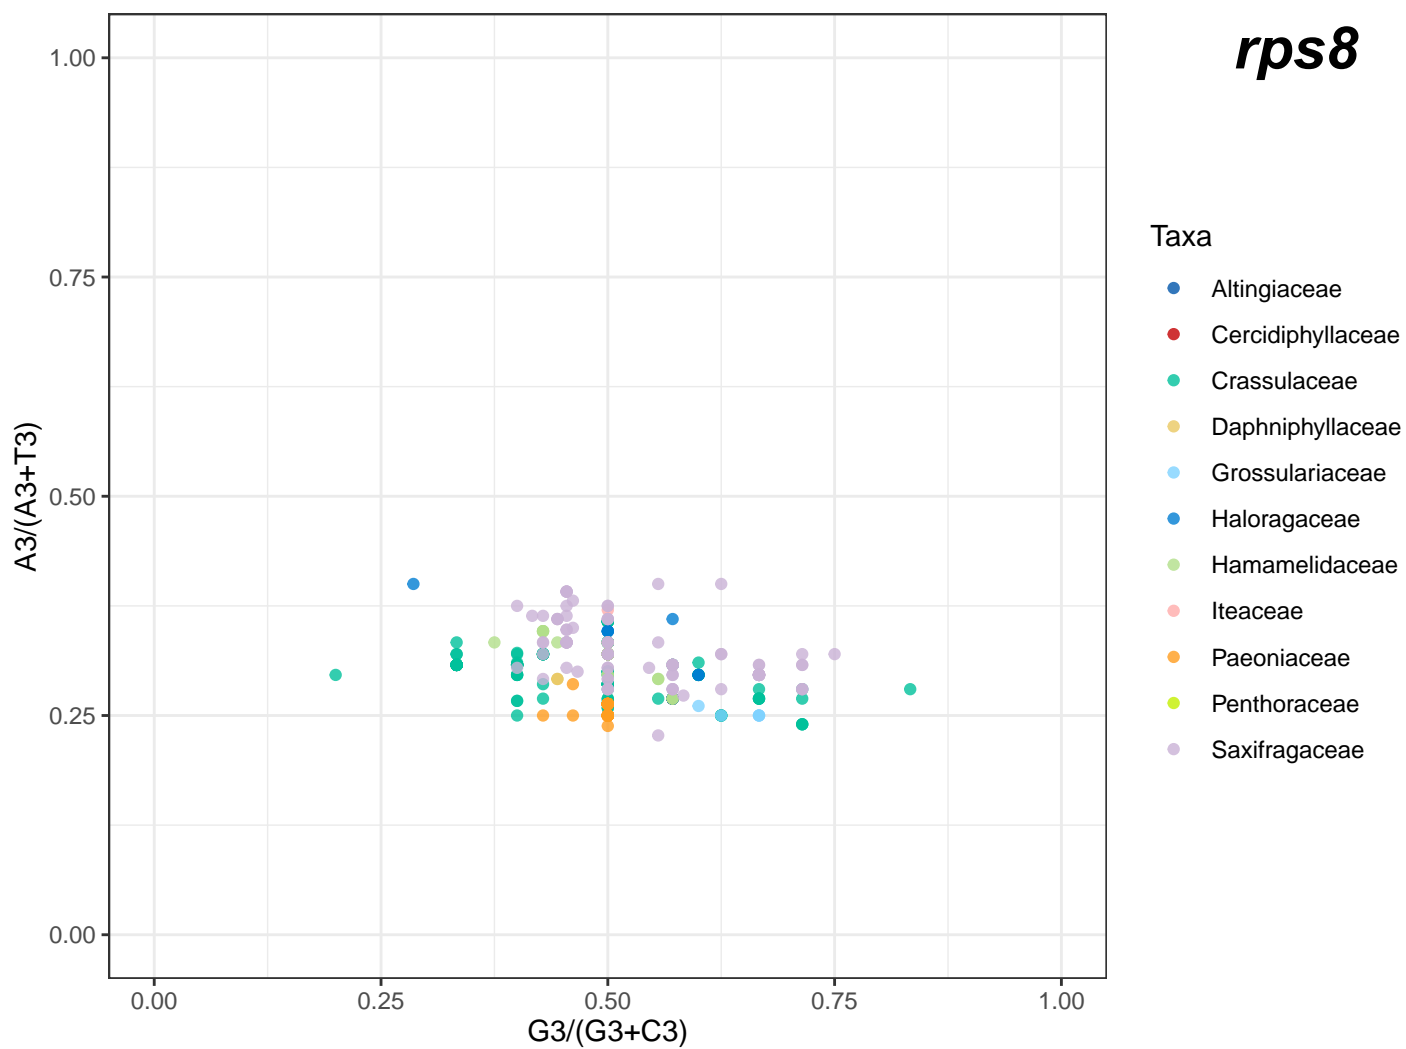

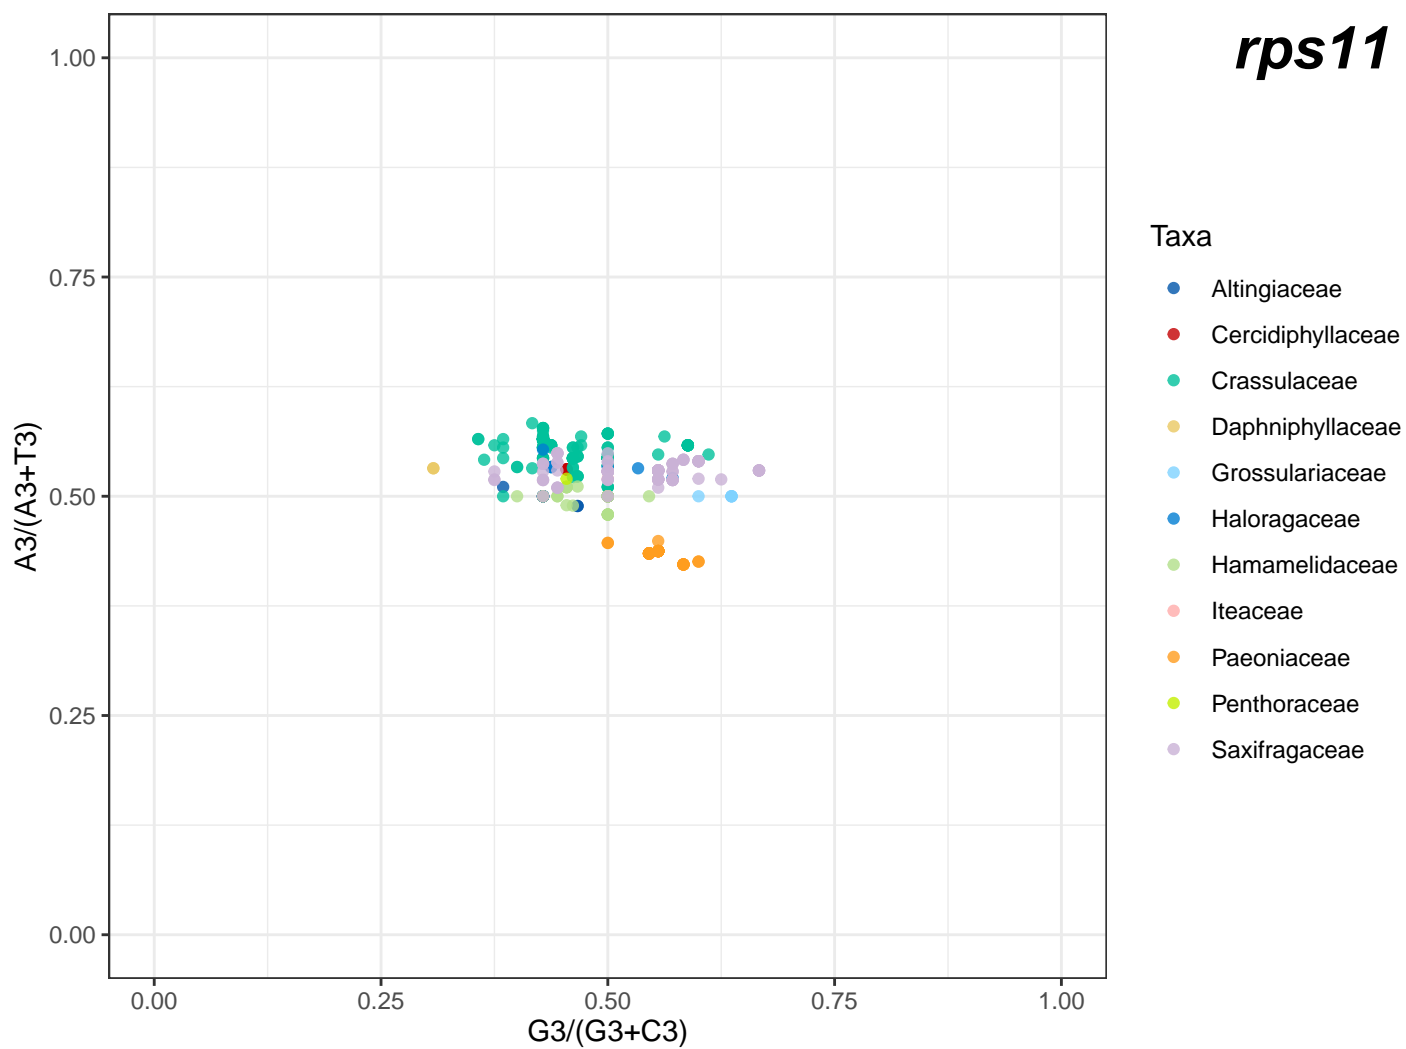

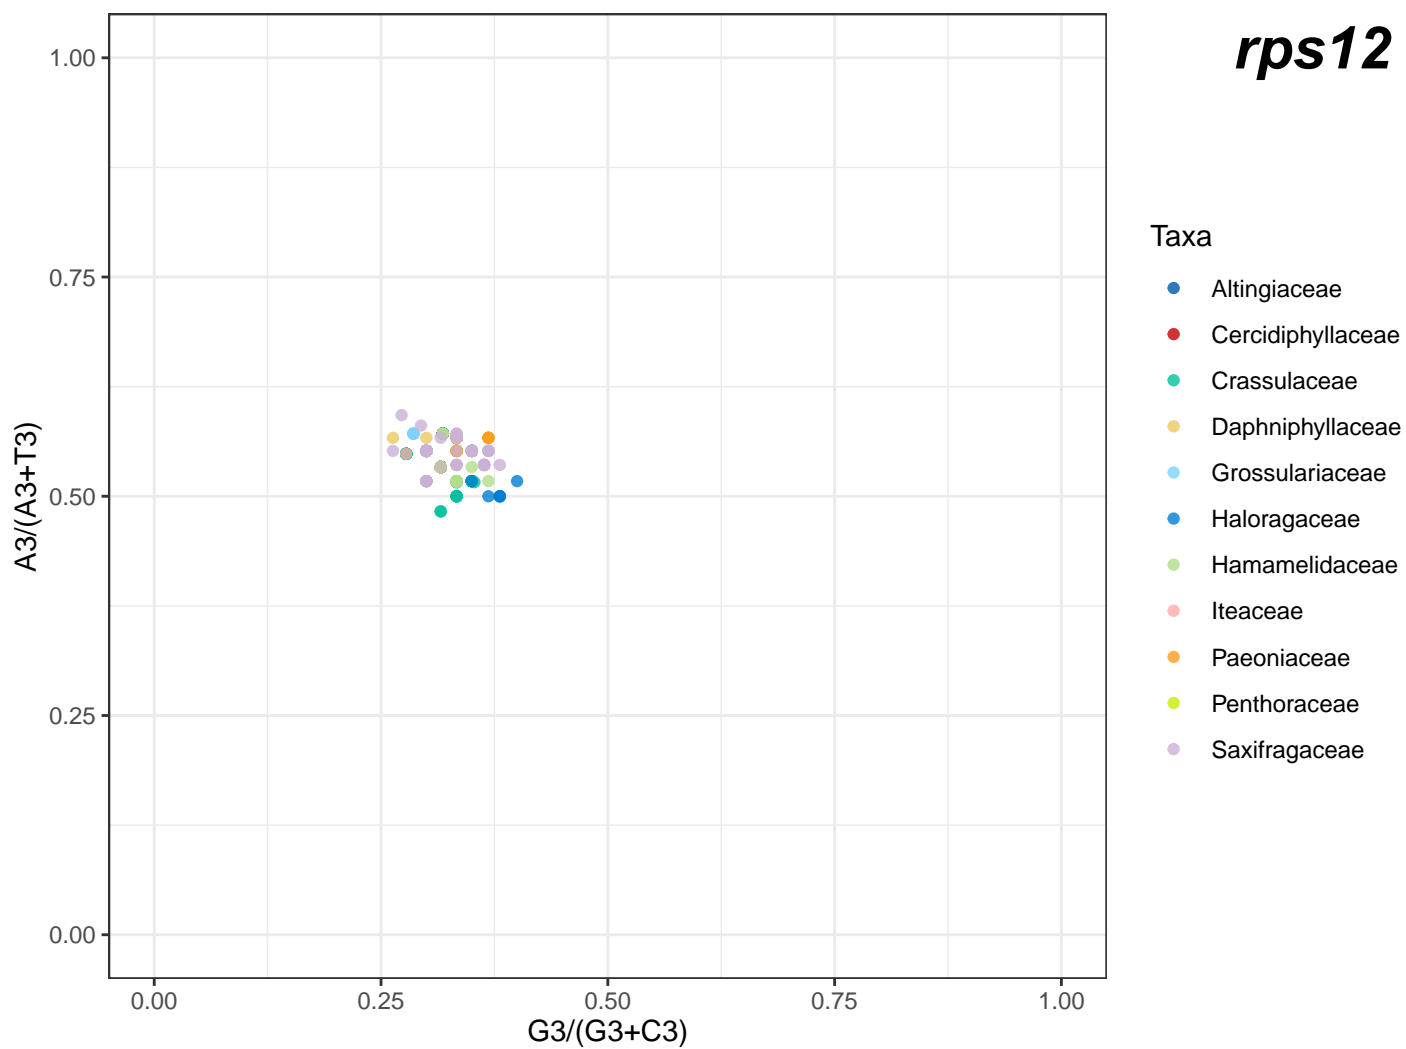



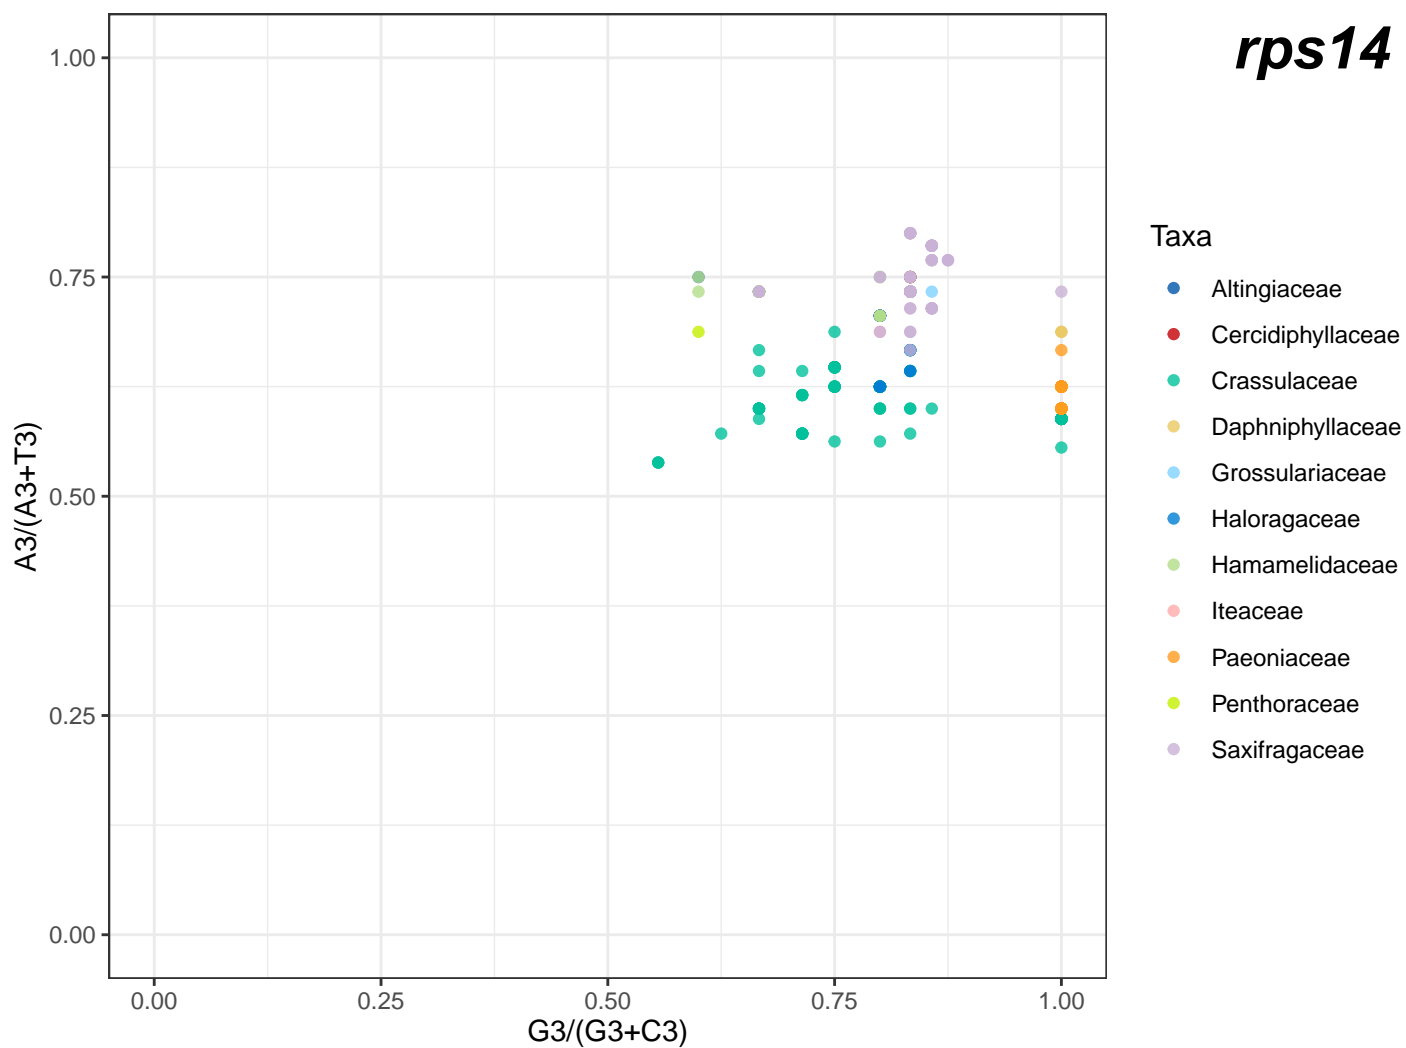

***ycf1***

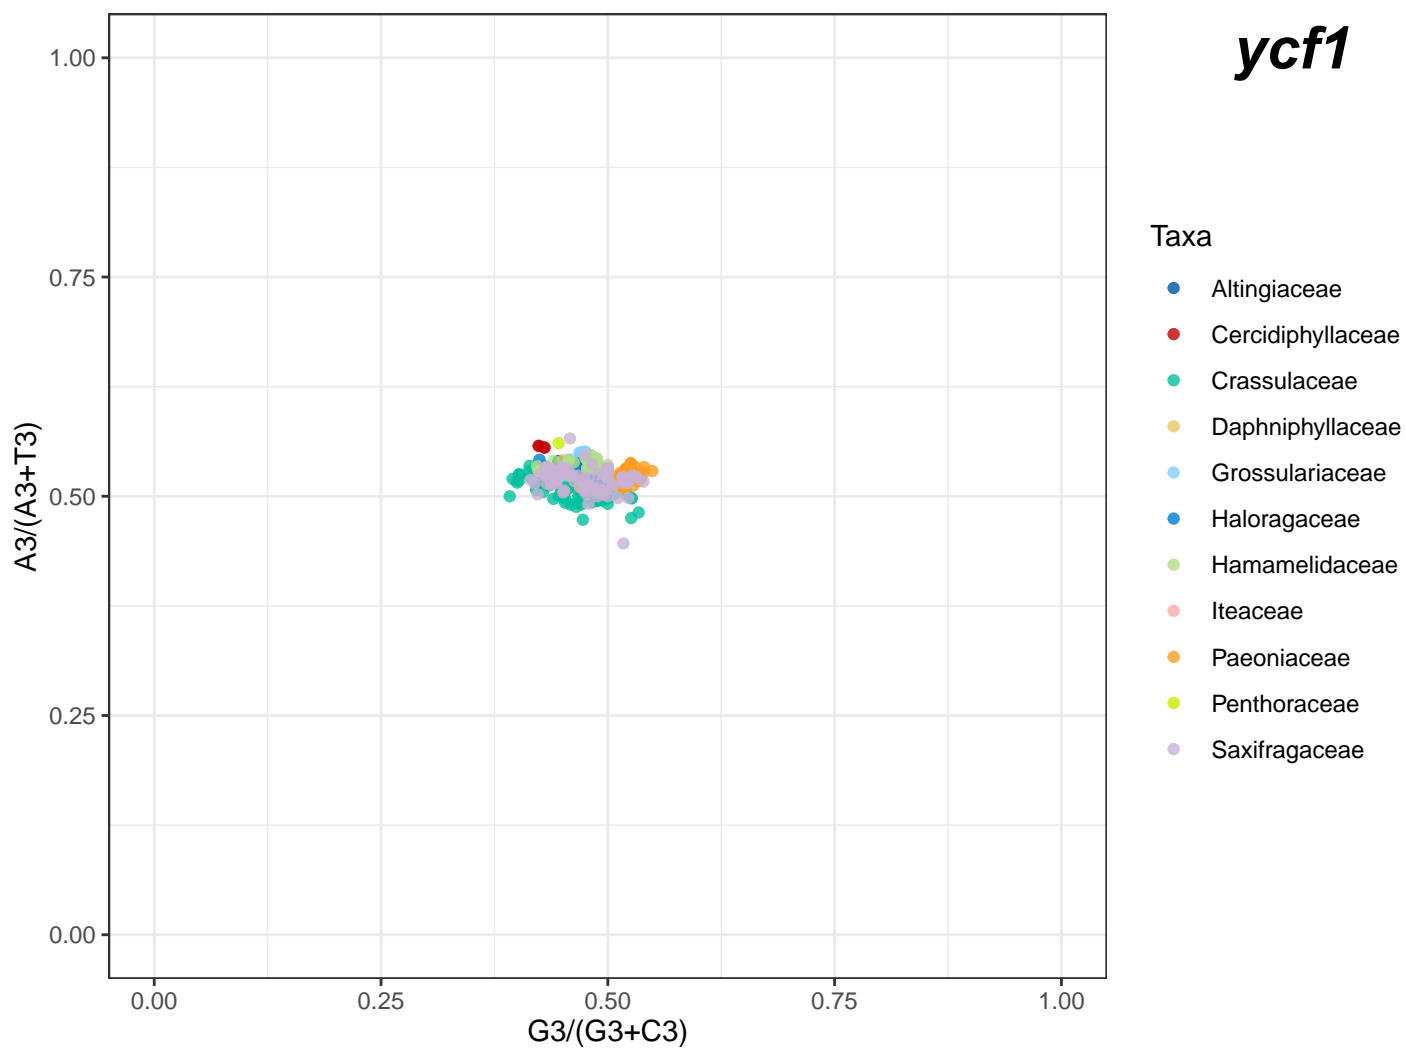

***ycf2***

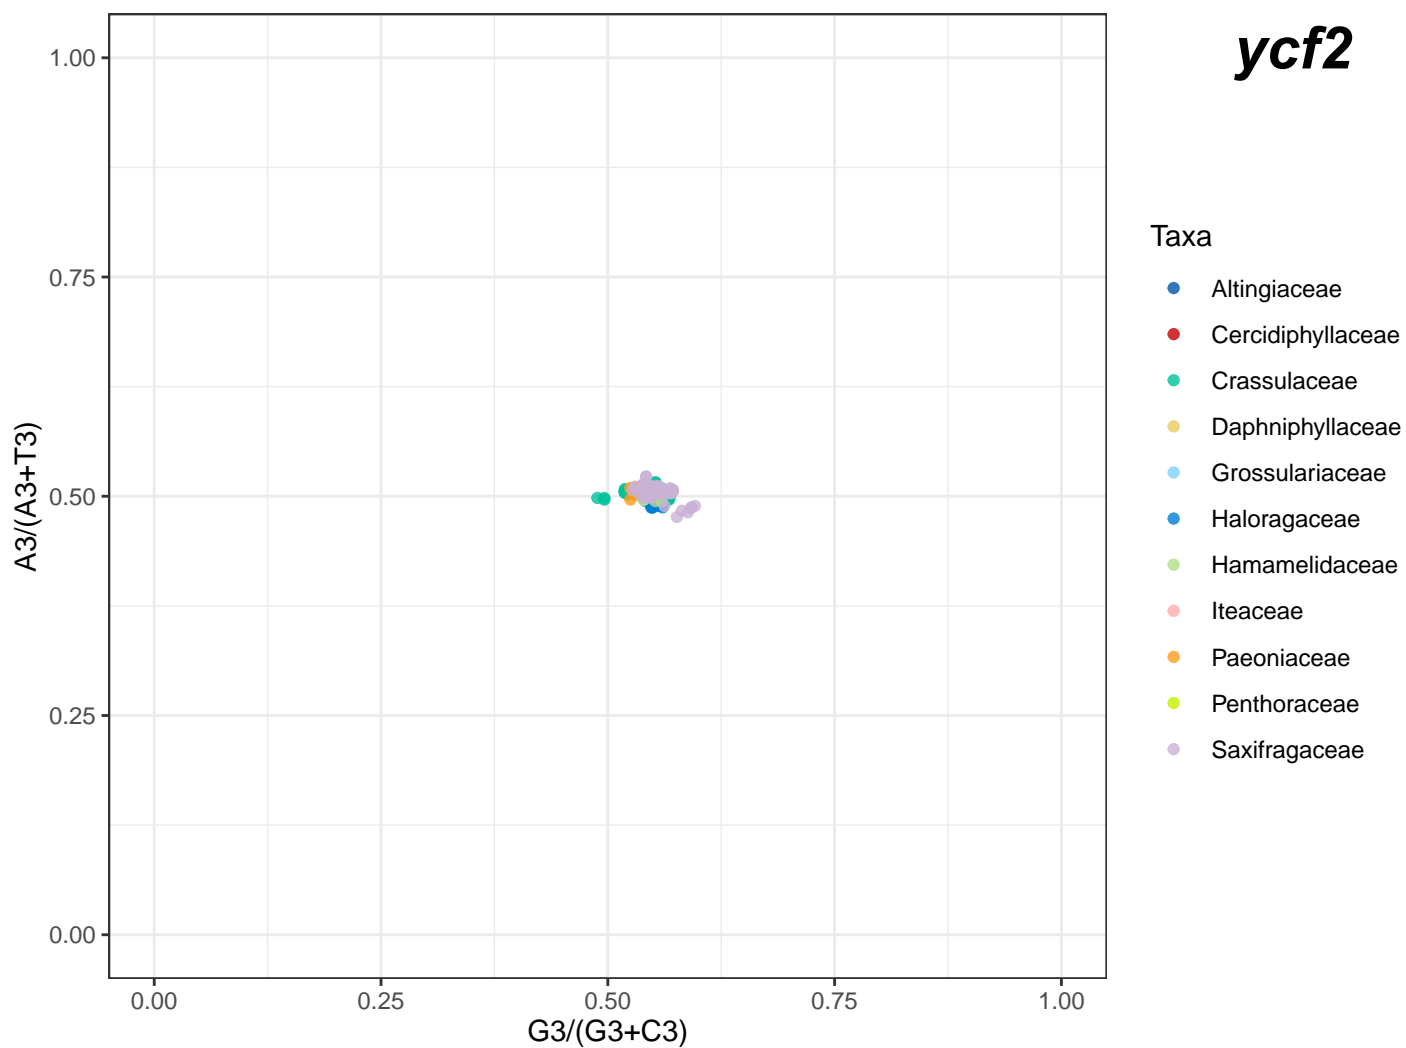

Supplement: s1 [file s1]
